# Supplementary material for: Genome Sequence Variability Predicts Drug Precautions and Withdrawals from the Market
Source: PLoS One. 2016 Sep 30;11(9):e0162135. doi: 10.1371/journal.pone.0162135 (PMC5045182; doi:10.1371/journal.pone.0162135)
Supplement: S1 File — Among 5099 drugs had at least one identified PK/PD genes from the DrugBank Version 4.1, excluding 4058 drugs having less than five PK/PD genes, 1041 drugs having five or more PK/PD genes were included. For these inclusion drugs, we matched the drug regulation information for further analysis. (XLSX) [file pone.0162135.s003.xlsx]

## Sheet: 1041 inclusion drugs
DrugBank ID	Group	Type	Drug Name	ATC Code	Genes	FDA Pharmacogenomics	Beers criteria	DrugBank withdrawn	UN withdrawn	EMA withdrawn
DB00002	approved	biotech	cetuximab	L01XC06	EGFR,FCGR3B,C1R,C1QA,C1QB,C1QC,FCGR3A,C1S,FCGR1A,FCGR2A,FCGR2B,FCGR2C	1	0	0	0	1
DB00005	approved, investigational	biotech	etanercept	L04AB01	TNF,TNFRSF1B,FCGR1A,FCGR3A,FCGR2A,FCGR2B,FCGR2C,LTA,FCGR3B,C1S,C1R,C1QA,C1QB,C1QC,PTGS2	0	0	0	0	0
DB00013	approved, investigational, withdrawn	biotech	urokinase	B01AD04	PLG,PLAUR,PLAU,PLAT,SERPINE1,SERPINB2,SERPINA5,LRP2,ST14,NID1	0	0	1	0	0
DB00020	approved, investigational	biotech	sargramostim	L03AA09	CSF2RA,IL3RA,CSF2RB,SDC2,PRG2	0	0	0	1	0
DB00025	approved, investigational	biotech	antihemophilic factor		F10,F9,VWF,PHYH,ASGR2,HSPA5,CALR,CANX,LMAN1,LRP1,MCFD2,F2,PROC	0	0	0	0	0
DB00028	approved, investigational	biotech	intravenous immunoglobulin		FCGR1A,FCGR1B,FCGR2A,FCGR2B,FCGR2C,FCGR3A,FCGR3B,C3,C4A,C4B,C5	0	0	0	0	0
DB00030	approved, experimental, investigational	biotech	insulin regular		INSR,IGF1R,RB1,CTSD,IDE,PCSK2,CPE,PCSK1,NOV,LRP2,IGFBP7,SYTL4,CYP1A2	0	0	0	0	1
DB00031	approved	biotech	tenecteplase	B01AD11	PLG,FGA,PLAUR,SERPINE1,SERPINB2,CLEC3B,KRT8,ANXA2,CALR,CANX,LRP1	0	0	0	0	0
DB00035	approved	small molecule	desmopressin	H01BA02	AVPR2,AVPR1A,AVPR1B,PTGS1,PTGS2	0	1	0	0	0
DB00036	approved	biotech	coagulation factor viia		F10,HPN,TFPI,GGCX,F7,F3	0	0	0	0	0
DB00039	approved	biotech	palifermin	V03AF08	FGFR2,NRP1,FGFR1,FGFR4,FGFR3,HSPG2	0	0	0	0	0
DB00041	approved	biotech	aldesleukin	L03AC01	IL2RB,IL2RA,IL2RG,PTGS2,PLA2G4A,CYP3A4,XDH,CYP2E1	0	0	0	0	0
DB00051	approved	biotech	adalimumab	L04AB04	TNF,FCGR3B,C1R,C1QA,C1QB,C1QC,FCGR3A,C1S,FCGR1A,FCGR2A,FCGR2B,FCGR2C	0	0	0	0	0
DB00054	approved	biotech	abciximab	B01AC13	ITGB3,ITGA2B,FCGR3B,C1R,C1QA,C1QB,C1QC,FCGR3A,C1S,FCGR1A,FCGR2A,FCGR2B,FCGR2C,VTN	0	0	0	0	0
DB00055	approved, investigational, withdrawn	biotech	drotrecogin alfa		F8,F5,SERPINE1,THBD,PROS1,CP,F2,PF4,SERPINA5,SERPINB6,GGCX,PROCR	0	0	1	0	0
DB00056	approved, investigational, withdrawn	biotech	gemtuzumab ozogamicin		CD33,FCGR3B,C1R,C1QA,C1QB,C1QC,FCGR3A,C1S,FCGR1A,FCGR2A,FCGR2B,FCGR2C	0	0	1	0	0
DB00062	approved	biotech	human serum albumin		APOE,SAA1,AMBP,CYP2C9,MPO,UGT1A9	0	0	0	0	0
DB00071	approved	biotech	insulin, porcine		INSR,IGF1R,IDE,HLA-DQA2,HLA-DQB1,RB1,CTSD,CPE,PCSK2,PCSK1,NOV,LRP2,IGFBP7,SYTL4,CYP1A2	0	0	0	0	0
DB00072	approved, investigational	biotech	trastuzumab	L01XC03	ERBB2,EGFR,C1R,C1QA,C1QB,C1QC,C1S,FCGR1A,FCGR2A,FCGR2B,FCGR2C,FCGR3B,FCGR3A,CYP19A1	1	0	0	0	0
DB00073	approved	biotech	rituximab	L01XC02	MS4A1,FCGR3B,C1R,C1QA,C1QB,C1QC,FCGR3A,C1S,FCGR1A,FCGR2A,FCGR2B,FCGR2C	1	0	0	0	0
DB00074	approved, investigational	biotech	basiliximab	L04AC02	IL2RA,IL2RB,FCGR1A,FCGR3A,FCGR2A,FCGR2B,FCGR2C,FCGR3B,C1S,C1R,C1QA,C1QB,C1QC	0	0	0	0	0
DB00075	approved, investigational	biotech	muromonab	L04AA02	CD3D,CD3E,CD3G,CD247,FCGR3B,C1R,C1QA,C1QB,C1QC,FCGR3A,C1S,FCGR1A,FCGR2A,FCGR2B,FCGR2C	0	0	0	0	0
DB00078	approved	biotech	ibritumomab		MS4A1,FCGR3B,C1R,C1QA,C1QB,C1QC,FCGR3A,C1S,FCGR1A,FCGR2A,FCGR2B,FCGR2C	0	0	0	0	0
DB00081	approved	biotech	tositumomab		MS4A1,FCGR3B,C1R,C1QA,C1QB,C1QC,FCGR3A,FCGR1A,FCGR2A,FCGR2B,FCGR2C	1	0	0	0	0
DB00082	approved	biotech	pegvisomant	H01AX01	GHR,CYP27A1,GLUL,CYP2C18,CYP3A4,BCHE,CYP2C19,CYP4A11	0	0	0	0	1
DB00087	approved, investigational	biotech	alemtuzumab	L04AA34	CD52,FCGR3B,C1R,C1QA,C1QB,C1QC,FCGR3A,FCGR1A,FCGR2A,FCGR2B,FCGR2C	0	0	0	0	0
DB00091	approved, investigational	small molecule	cyclosporine	L04AD01,S01XA18	CAMLG,PPP3R2,PPIA,PPIF,CYP3A7,CYP3A5,CYP3A4,CYP2C19,CYP2C8,CYP2C9,CYP2D6,ABCB1,ABCC3,ABCB11,ABCC1,SLCO1A2,SLC10A2,SLC10A1,SLC22A6,ABCC10,ABCC2,ABCG2,SLCO1B1	0	0	0	0	0
DB00092	approved, withdrawn	biotech	alefacept	L04AA15	CD2,C1R,C1QA,C1QB,C1QC,FCGR3A,FCGR1A,FCGR2A,FCGR2B,FCGR2C,FCGR3B	0	0	1	0	0
DB00095	approved, investigational	biotech	efalizumab	L04AA21	ITGAL,FCGR3B,C1R,C1QA,C1QB,C1QC,FCGR3A,FCGR1A,FCGR2A,FCGR2B,FCGR2C	0	0	0	0	0
DB00098	approved	biotech	antithymocyte globulin		CD1A,MR1,ITGAL,CD86,FCGR2B,CD4,ITGB1,ITGAV,ITGB3	0	0	0	0	0
DB00100	approved	biotech	coagulation factor ix	B02BD04	F10,F11,F7,F8,F2,LRP1,GGCX	0	0	0	0	0
DB00108	approved, investigational	biotech	natalizumab	L04AA23	ITGA4,FCGR3B,C1R,C1QA,C1QB,C1QC,FCGR3A,FCGR1A,FCGR2A,FCGR2B,FCGR2C,ICAM1	0	0	0	0	1
DB00110	approved, investigational	biotech	palivizumab	J06BB16	F,FCGR3B,C1R,C1QA,C1QB,C1QC,FCGR3A,FCGR1A,FCGR2A,FCGR2B,FCGR2C	0	0	0	0	0
DB00111	approved, investigational	biotech	daclizumab	L04AC01	IL2RA,IL2RB,FCGR3B,C1R,C1QA,C1QB,C1QC,FCGR3A,FCGR1A,FCGR2A,FCGR2B,FCGR2C	0	0	0	0	0
DB00112	approved, investigational	biotech	bevacizumab	L01XC07	VEGFA,FCGR3B,C1R,C1QA,C1QB,C1QC,FCGR3A,FCGR1A,FCGR2A,FCGR2B,FCGR2C	0	0	0	0	0
DB00114	nutraceutical	small molecule	pyridoxal phosphate	A11HA06	AGXT2,GAD1,CBS,KYNU,SHMT1,NFS1,GOT1,OAT,ODC1,AADAT,ABAT,PNPO,SGPL1,TAT,CCBL1,THNSL1,PYGL,SPTLC2,CSAD,HDC,ADC,SDS,GCAT,GLDC,GPT,PSAT1,ALAS1,AGXT,PDXP,SPTLC1,CTH,BCAT1,BCAT2,PROSC,FTCD,GOT2,PYGB,PYGM,DDC,SHMT2,GIG18,GAD1,SHMT1,SHMT1,ALAS1,GAD2,DDC,PDXDC1,CCBL2,GADL1,SCLY,IGSF10,AGXT2L2,GAD1,SHMT2,GPT2,MOCOS,SDSL,pcap,SRR,SEPSECS,SPTLC3,GAD65,TLH6,CSAD	0	0	0	0	0
DB00115	approved, nutraceutical	small molecule	cyanocobalamin	B03BA01	MTR,MUT,MTRR,MMAA,MMACHC,MTHFR,MMAB,AMN,TCN1,TCN2,GIF,CUBN	0	0	0	0	0
DB00116	approved, nutraceutical	small molecule	tetrahydrofolic acid		MTHFD1,MTHFD2,AMT,ALDH1L1,MTR,FTCD,ATIC,SHMT1,SHMT2,MTHFR,SHMT1,SHMT1,MTHFR,SHMT2,MTFMT,ABCC2	0	0	0	0	0
DB00117	approved, nutraceutical	small molecule	l-histidine		HDC,HARS,SLC38A3,HAL,SLC16A10	0	0	0	0	0
DB00118	approved, nutraceutical	small molecule	s-adenosylmethionine		GNMT,AMD1,MAT2A,CBS,MAT1A,COMT,CYP2E1,SRM	0	0	0	0	0
DB00119	approved, nutraceutical	small molecule	pyruvic acid		SLC16A3,SLC16A2,AGXT2,SLC16A5,PKLR,SLC16A6,SLC16A7,PDHB,PKM2,ABAT,SLC16A4,SLC16A8,SLC16A1,PC,SLC16A7,SLC16A1,SLC16A10,SLCO2A1,SLC16A3	0	0	0	0	0
DB00120	approved, nutraceutical	small molecule	l-phenylalanine		TAT,SLC7A8,FARSA,PAH,FARS2,FARSB,TH,SLC16A10	0	0	0	0	0
DB00121	approved, nutraceutical	small molecule	biotin	A11HA05	PCCB,HLCS,SLC5A6,MCCC2,ACACB,MCCC1,PC,PCCA,ACACA,CYP1B1	0	0	0	0	0
DB00122	approved, nutraceutical	small molecule	choline		PCYT1B,ACHE,PCYT1A,PLD2,BCHE,PLD1,PHOSPHO1,CEPT1,CHKB,CHAT,CHKA,CHDH,SLC22A2,SLC22A1,SLC22A3,SLC22A5,SLC22A4,SLC44A1,SLC44A4,SLC44A2,SLC44A3,SLC5A7	0	0	0	0	0
DB00123	approved, nutraceutical	small molecule	l-lysine		SLC7A1,SLC7A4,SLC7A3,SLC7A2,KARS,SLC16A10,SLC22A4	0	0	0	0	0
DB00125	approved, nutraceutical	small molecule	l-arginine		NOS3,SLC7A3,ADC,ASL,NOS2,SLC7A1,ARG2,SLC7A4,ASS1,SLC22A5,SLC16A10,SLC22A4	0	0	0	0	0
DB00126	approved, nutraceutical	small molecule	vitamin c	G01AD03,S01XA15	LCT,SP_0314,xylA,PLOD2,PHYH,PLOD3,BBOX1,DBH,PAM,P4HA1,LEPRE1,OGFOD2,ALKBH2,LEPREL1,LEPREL2,OGFOD1,EGLN2,ALKBH3,KDM5D,EGLN1,SLC23A1,PLOD1,EGLN3,TMLHE,P4HTM,SLC23A1	0	0	0	0	0
DB00127	approved, nutraceutical	small molecule	spermine		SMS,SMOX,ODC1,XDH,SAT1,SAT2,SLC22A4,SLC22A1	0	0	0	0	0
DB00128	approved, nutraceutical	small molecule	l-aspartic acid		RNASE1,LYZ,SLC25A13,GOT1,SLC25A13,ASPA,ASNS,ASS1,ACY1,GOT2,DARS,SLC25A12,ASPH,PAICS,CAD,ADSS,SLC1A1,GIG18,ASS1,DARS2,ASRGL1,ADSSL1,ACY3,SLC16A10	0	0	0	0	0
DB00129	approved, nutraceutical	small molecule	l-ornithine		OAT,OTC,ARG1,OAZ1,SLC7A2,SLC25A2,SLC7A4,SLC7A1,ARG2,SLC25A15,SLC7A3,OAZ2,GATM,OAZ3	0	0	0	0	0
DB00130	approved, investigational, nutraceutical	small molecule	l-glutamine	A16AA03	CTPS,PPAT,GLUL,F13A1,GLS,GLS2,TGM2,TGM5,TGM6,TGM1,TGM4,TGM3,TGM7,GMPS,ASNS,CCBL1,PFAS,PET112L,GFPT2,CAD,QARS,NADSYN1,SLC16A10,SLC38A3,SLC1A5,SLC7A8	0	0	0	0	0
DB00131	approved, nutraceutical	small molecule	adenosine monophosphate		CREB1,PIM1,PDE4B,PYGL,PRKAB1,HINT1,PDE4D,ACSS1,ACSS2,PRKAA1,PRKAB2,ADCY1,ACSL1,FBP1,ADK,AMPD1,APRT	0	0	0	0	0
DB00132	approved, nutraceutical	small molecule	alpha-linolenic acid		FADS1,FADS2,SLC8A1,TRPV1,ELOVL4,FABP7	0	0	0	0	0
DB00133	approved, nutraceutical	small molecule	l-serine		CBS,SDS,SRR,SPTLC2,SPTLC1,SARS,AGXT,SLC16A10	0	0	0	0	0
DB00134	approved, nutraceutical	small molecule	l-methionine	V03AB26	MTRR,MTR,METAP2,BHMT,BHMT2,GLUL,MTHFR,MAT2A,MSRB2,MAT1A,SEPX1,MSRA,MARS,MARS2,MAT2B,SLC16A10	0	0	0	0	0
DB00135	approved, nutraceutical	small molecule	l-tyrosine		TH,YARS2,YARS,TAT,SLC16A2,SLC16A10	0	0	0	0	0
DB00138	approved, nutraceutical	small molecule	l-cystine		SLC7A11,CTNS,SLC7A9,SLC3A1,SLC16A10	0	0	0	0	0
DB00139	approved, nutraceutical	small molecule	succinic acid		SDHC,SUCNR1,OXCT2,TMLHE,SUCLA2,SLC25A10,SDHA,HSD17B6,SLC13A3,SLC13A2,SLC13A1,SUCLG2,SDHD,P4HA2,PLOD3,BBOX1,P4HA1,SDHB,ALDH5A1,SUCLG1,OXCT1,PLOD1,ASPH,LEPRE1,LEPREL1,LEPREL2,SLC22A8	0	0	0	0	0
DB00140	approved, nutraceutical	small molecule	riboflavin		RFK,ribE,BLVRB,MAOA,MTHFR,SLC22A6	0	0	0	0	0
DB00141	approved, nutraceutical	small molecule	n-acetyl-d-glucosamine		B4GALT3,B4GALT4,B4GALT2,NAGK,NAGPA,NAGLU,RENBP,B4GALT1	0	0	0	0	0
DB00142	nutraceutical	small molecule	l-glutamic acid		GRM1,GRM4,GRIK4,GRIK5,GRM7,GRM8,SLC1A7,OPLAH,PFAS,BCAT2,GRIN2D,GRID2,GRIN3B,PET112L,GLS,GOT2,EPRS,ASNS,GLUL,GOT1,TAT,GPT,GGCX,SLC1A3,SLC1A2,SLC1A1,GCLC,SLC1A6,GLUD2,GMPS,BCAT1,ABAT,GRIN1,FPGS,ENPEP,GRIN2A,GRIN2B,GRIN2C,GIG18,EARS2,LGSN,NADSYN1,CCBL2,NAGS,AADAT,GRIN3A,GPT2,SLC25A18,SLC25A22,AASS,GLS2,DNPEP,GRID1,SLC7A11,PGCP,PSAT1,GLUD1,GRIK1,GRIA1,GCLM,FOLH1,GAD2,GAD1,FTCD,GRIA2,GRIA3,GRIA4,ALDH1…	0	0	0	0	0
DB00143	approved, nutraceutical	small molecule	glutathione	V03AB32	MGST3,HPGDS,TXNDC12,GSTA1,GSTA2,MGST1,ESD,GGT1,GSTM2,GLRX,GPX4,GSTM5,GPX6,HAGH,GPX1,GPX8,GPX7,MGST2,GSTO2,GLRX2,GLO1,LTC4S,GSR,GSS,GSTM1,GSTK1,GSTA3,GSTM3,GSTA4,GSTM4,GSTA5,GSTP1,GSTO1,GPX1,GPX2,GSTT1,GSTZ1,GPX5,GPX3,GSTA2,GSTA1,ABCC1,ABCC2,ABCC3,ABCC4,ABCC5	0	0	0	0	0
DB00144	approved, nutraceutical	small molecule	phosphatidylserine		DGKG,DGKD,PTDSS2,SMPD4,SMPD3,ATP8A1,PRKCA,PTDSS1,PISD,SCARB1	0	0	0	0	0
DB00145	approved, nutraceutical	small molecule	glycine	B05CX03	GCAT,ALAS1,ALAS2,GCSH,GARS,GRIN2A,BAAT,GPR18,GSS,GRIN2C,SHMT1,SHMT1,GLYAT,SLC36A1,SHMT2,GLYATL2,GLYATL1,AGXT2,SLC32A1,PIPOX,SLC6A5,GRIN3B,GLDC,SLC6A9,GLRA1,AGXT,GLRB,SHMT1,GLRA3,GLRA2,GNMT,SHMT2,GATM,SLC16A10	0	0	0	0	0
DB00148	approved, nutraceutical	small molecule	creatine		CKM,CKMT1A,CKB,CKMT2,SLC6A8,GAMT,SLC22A5	0	0	0	0	0
DB00149	approved, nutraceutical	small molecule	l-leucine		LARS2,BCAT2,BCAT1,LCMT2,LCMT1,LARS,SLC16A10,SLC16A2	0	0	0	0	0
DB00150	approved, nutraceutical	small molecule	l-tryptophan	N06AX02	WARS2,trpS,WARS,TDO2,DDC,trpS,WARS2,TPH1,TPH2,WARS,IDO1,SLC16A2,SLC16A10	0	0	0	1	0
DB00151	approved, nutraceutical	small molecule	l-cysteine		GCLM,GCLC,CDO-1,GOT1,CTH,CBS,CARS,MGMT,GSS,SLC19A3,CARS2,CSAD,NFS1,CDO1,SLC16A10	0	0	0	0	0
DB00152	approved, nutraceutical	small molecule	thiamine		TPK1,SLC19A2,CYP4B1,SLC22A2,SLC22A1,SLC22A5	0	0	0	0	0
DB00153	approved, nutraceutical	small molecule	ergocalciferol	A11CC01	VDR,CYP24A1,CYP27B1,CYP27A1,CYP3A4,CYP2R1	0	0	0	0	0
DB00155	approved, nutraceutical	small molecule	l-citrulline		ASS1,DDAH2,ASS1,DDAH1,OTC,NOS1,NOS2,NOS3,PADI6,PADI1,PADI3,PADI2,PADI4	0	0	0	0	0
DB00157	nutraceutical	small molecule	nadh		UGDH,ADH1A,SORD,ADH4,ADH1C,ADH1B,ADH7,GPD1,LDHAL6A,ADH5,AKR1B1,HSD17B10,MDH2,LDHA,ME2,HSD17B4,LDHAL6B,LDHC,LDHB,EHHADH,HADH,ME3,BDH1,MDH1,HIBADH,HSD17B3,HMGCR,ME1,PHGDH,HSD17B7,IDH3G,IDH3B,IDH3A,HSD17B1,HSD17B2,RDH5,H6PD,HSD17B8,AKR1C4,IMPDH2,AKR1C3,HPGD,TSTA3,AKR1C1,HSD11B1,HSD3B2,HSD3B1,IMPDH1,HADHA,ALDH2,HSD11B2,AKR1C2,NSDHL,ALDH3B2,ALDH6A1,ALDH3A1,ALDH1A1,GAPDHS,ALDH9A1,ALDH1A3,ALDH1B1,ALDH3B…	0	0	0	0	0
DB00158	approved, nutraceutical	small molecule	folic acid	B03BB01	FOLR2,FOLR3,CYP2E1,GGH,MTHFR,ABCC3,ABCC11,SLC22A6,ABCC4,ABCG2,SLC46A1,SLC25A32	0	0	0	0	1
DB00159	approved, nutraceutical	small molecule	icosapent		PTGS2,PTGS1,PPARG,PPARD,FADS1,ACSL4,ACSL3,FFAR1,SLC8A1,TRPV1,FABP7	0	0	0	0	0
DB00160	approved, nutraceutical	small molecule	l-alanine		AGXT,ABAT,KYNU,AARS2,AGXT2L2,GPT2,GPT,NFS1,SLC36A1,SLC7A8,AGXT2,AARS,SLC1A4,SLC16A10	0	0	0	0	0
DB00161	approved, nutraceutical	small molecule	l-valine		PCCB,BCAT1,VARS,VARS,PCCB,BCAT1,SLC16A10	0	0	0	0	0
DB00162	approved, nutraceutical	small molecule	vitamin a	D10AD02,R01AX02,S01XA02	RDH12,DHRS3,ALDH1A3,RETSAT,RDH11,DHRS4,RDH14,RDH8,LRAT,RBP1,RDH5,RDH13,RBP3,ALDH1A2,ALDH1A1,RLBP1,CYP1A1,CYP26A1,RBP5,RBP7,RBP4,RBP2	0	0	0	0	0
DB00163	approved, nutraceutical	small molecule	vitamin e		NR1I2,PRKCB,ALOX5,PRKCA,DGKA,PPP2CB,PPP2CA,SEC14L4,SEC14L3,SEC14L2,GSTA2,GSTP1,GSTO1,GSTM3,GCLC,NQO1,HMOX1,SOD1,TTPA	0	0	0	0	0
DB00167	approved, nutraceutical	small molecule	l-isoleucine		IARS2,ACADSB,BCAT1,BCAT2,IARS,SLC16A10	0	0	0	0	0
DB00168	approved, nutraceutical	small molecule	aspartame		TRPV1,TAS1R2,SLC22A6,SLC22A8,SLC22A11	0	0	0	0	0
DB00169	approved, nutraceutical	small molecule	cholecalciferol	A11CC05	VDR,CYP2R1,CYP27A1,CYP2J2,CYP3A4,CYP11A1,CYP1A1,CYP2B6,CYP2C19,CYP2C8,CYP2C9,CYP2D6,GC	0	0	0	0	0
DB00170	approved, nutraceutical	small molecule	menadione	B02BA02	GGCX,VKORC1,VKORC1L1,F2,F7,F9,F10,PROC,PROS1,PROZ,NQO2,NQO1,BGLAP,XDH,AOX1,CYP2E1,MTHFR,CYP1A1,CYP1A2,CYP2A6	0	0	0	0	0
DB00171	approved, nutraceutical	small molecule	adenosine triphosphate		ABL2,ABCB1,ABCG1,ABCC2,ABCA1,ACSS2,NAE1,PRKAA1,ARAF,ACVRL1,ACSL1,NT5C2,ASNA1,ABCC9,AKT1,ADRBK1,APAF1,ACSS1,ACVR1B,ACVR1,ABCB11,ASNS,CDK15,SLC25A4,ABCC8,ASS1,AFG3L2,ADRBK2,AMHR2,TNK2,ABL1,ADCY1,ADK	0	0	0	0	0
DB00172	approved, nutraceutical	small molecule	l-proline		P4HA2,PRODH,PPIH,PROSC,P4HA1,PPIB,PPIF,PPIC,PPIA,PPIG,LEPRE1,P5CR2,PARS2,LEPREL1,LEPREL2,PYCRL,C14orf149,PYCR1,EPRS,SLC6A14,SLC6A7,PYCR2,PRODH,SLC16A10	0	0	0	0	0
DB00173	approved, nutraceutical	small molecule	adenine		APRT,mtnN,ACACB,ACP1,PECR,mutY,ptd,SRPK2,ruvB,MTAP,cobT,UGT1A1	0	0	0	0	0
DB00174	approved, nutraceutical	small molecule	l-asparagine		SLC1A5,ASRGL1,NARS2,SLC38A3,ASNS,NARS,SLC16A10	0	0	0	0	0
DB00175	approved	small molecule	pravastatin	C10AA03	HMGCR,CYP2C8,CYP2C9,CYP2D6,CYP3A4,CYP3A5,SLCO1B1,SLCO2B1,ABCB1,SLCO1A2,SLC22A6,SLC22A8,ABCC2,SLC22A11,ABCG2,SLC22A7,SLC16A1,ABCB11,SLCO1B3	1	0	0	0	0
DB00176	approved, investigational	small molecule	fluvoxamine	N06AB08	SLC6A4,CYP2D6,CYP1A2,CYP2E1,CYP1A1,CYP3A4,CYP3A5,CYP3A7,CYP2C9,CYP2C19,CYP2B6,ABCB1	1	0	0	1	0
DB00177	approved, investigational	small molecule	valsartan	C09CA03	AGTR1,CYP2C9,ALB,SLCO1B3,SLCO1B1	0	0	0	0	0
DB00182	approved, illicit	small molecule	amphetamine	N06BA01	SLC18A2,SLC6A3,CARTPT,TAAR1,SLC6A2,ADRA1A,ADRA1B,ADRA1D,ADRA2A,ADRA2B,ADRA2C,ADRB1,ADRB2,ADRB3,DRD2,MAOB,SLC6A4,CYP2D6,CYP2A6,SLC22A3,SLC22A5	0	0	0	0	0
DB00184	approved	small molecule	nicotine	N07BA01	CHRNA4,CHRNA7,CHRNB2,CHRNA2,CHRNA3,CHRNA5,CHRNA6,CHRNA9,CHRNA10,CHRNB3,CHRNB4,CYP19A1,CHAT,CYP2A6,CYP2E1,CYP2A13,CYP2B6,CYP1A1,CYP1A2,CYP2C19,CYP2C8,CYP2C9,CYP2D6,CYP3A4,MAOA,MAOB,SLC22A2,SLC22A1,SLC22A3,SLC22A5,SLC22A4	0	0	0	0	0
DB00185	approved	small molecule	cevimeline	N07AX03	CHRM3,CHRM1,CYP2D6,CYP3A4,FMO1	1	0	0	0	0
DB00186	approved	small molecule	lorazepam	N05BA06	GABRA1,GABRA2,GABRA3,GABRA4,GABRA5,GABRA6,GABRB1,GABRB2,GABRB3,GABRD,GABRE,GABRG1,GABRG2,GABRG3,GABRP,GABRQ,TSPO,UGT2B15	0	1	0	0	0
DB00188	approved, investigational	small molecule	bortezomib	L01XX32	PSMD2,PSMB1,PSMB5,PSMB2,PSMD1,CYP3A4,CYP2C19,CYP2D6,CYP1A2,CYP2C9,PTGS1,CYP1A1,CYP2C8,SLC31A1	0	0	0	0	1
DB00189	approved, illicit, withdrawn	small molecule	ethchlorvynol	N05CM08	GABRA1,GABRA2,GABRA3,GABRA4,GABRA5,GABRA6,GABRB1,GABRB2,GABRB3,GABRD,GABRE,GABRG1,GABRG2,GABRG3,GABRP,GABRQ	0	0	1	0	0
DB00191	approved, illicit	small molecule	phentermine	A08AA01	SLC6A2,SLC6A4,SLC6A3,MAOA,MAOB,MAOA,MAOB,CYP1A2,CYP2C9,CYP2D6	0	0	0	1	0
DB00193	approved, investigational	small molecule	tramadol	N02AX02	OPRM1,SLC6A2,SLC6A4,HTR2C,OPRK1,OPRD1,GRIN3A,CHRFAM7A,CHRM3,CYP2D6,CYP3A4,CYP2B6	1	0	0	0	0
DB00196	approved	small molecule	fluconazole	D01AC15,J02AC01	ERG11,CYP3A4,CYP2C9,CYP2C19,CYP3A5,CYP3A7,CYP11B1,ABCB1	0	0	0	0	0
DB00197	withdrawn	small molecule	troglitazone		PPARG,ACSL4,SERPINE1,SLC29A1,ESRRG,ESRRA,CYP3A4,CYP2C8,UGT1A1,CYP2C19,CYP19A1,CYP1A1,CYP2B6,CYP2C9,CYP3A5,CYP3A7,UGT1A3,UGT1A4,UGT1A6,UGT1A7,UGT1A8,UGT1A9,UGT1A10,UGT2B7,UGT2B15,ABCB11,SLCO1B1	0	0	1	1	0
DB00198	approved	small molecule	oseltamivir	J05AH02	NA,CES1,NEU1,NEU2,ABCC4,SLC15A1,SLC22A8	0	0	0	0	0
DB00199	approved	small molecule	erythromycin	D10AF02,J01FA01,S01AA17	rplV,rplD,ABCB1,CYP3A4,MLNR,KCNH2,CYP51A1,ALB,SLC47A1,CYP3A4,CYP3A7,CYP3A5,CYP1A2,CYP2B6,ABCB1,ABCC1,SLCO1A2,SLC22A7	0	0	0	0	0
DB00200	approved	small molecule	hydroxocobalamin	B03BA03,V03AB33	MTR,MUT,MTRR,MMAA,TCN1,AMN,CUBN,MMAB,MMACHC,TCN2	0	0	0	0	0
DB00201	approved	small molecule	caffeine	N06BC01	ADORA1,ADORA2A,PDE4B,RYR1,PDE1A,PDE1B,PDE1C,PDE10A,PDE4A,PDE4B,PDE4C,PDE4D,PDE7B,PDE2A,PDE3A,PDE3B,PDE5A,PDE6C,PDE11A,PDE7A,PDE8A,PDE8B,PDE9A,PDE6A,PDE6B,PRKDC,PIK3CD,PIK3CA,PIK3CB,ITPR1,ITPR2,ITPR3,ATM,CYP3A5,CYP1A2,CYP3A7,CYP3A4,CYP2E1,CYP2C8,CYP2C9,CYP1A1,CYP1B1,CYP2D6,ABCB1	0	0	0	0	0
DB00202	approved	small molecule	succinylcholine	M03AB01	CHRNA10,CHRFAM7A,CHRM1,CHRM2,CHRM3,BCHE	0	0	0	0	0
DB00203	approved, investigational	small molecule	sildenafil	G04BE03	PDE5A,PDE6G,PDE6H,CYP3A4,CYP3A5,CYP3A7,CYP2C9,CYP2C19,CYP2D6,CYP1A1,CYP2E1,ABCC4,ABCC5,ABCC10	0	0	0	0	1
DB00206	approved	small molecule	reserpine	C02AA02	SLC18A2,SLC18A1,CYP3A5,ABCB1,SLC22A1,ABCB11,ABCC2,SLC22A2	0	1	0	0	0
DB00207	approved	small molecule	azithromycin	J01FA10,S01AA26	rplD,rplV,PADI4,CYP3A4,CYP2A6,CYP3A4,CYP1A2,ABCB1	0	0	0	0	0
DB00208	approved	small molecule	ticlopidine	B01AC05	P2RY12,CYP2C19,CYP2D6,CYP3A4,MPO,CYP2C9,CYP2C8,CYP1A2,CYP1A1,CYP2B6,CYP2E1	0	1	0	0	0
DB00210	approved	small molecule	adapalene	D10AD03	RARG,RARB,RXRG,RXRB,RARA,RXRA	0	0	0	0	0
DB00211	approved	small molecule	midodrine	C01CA17	ADRA1A,ADRA1B,ADRA1D,CYP2D6,SLC15A1	0	0	0	0	0
DB00213	approved	small molecule	pantoprazole	A02BC02	ATP4A,CYP2C19,CYP3A4,CYP1A2,CYP2C9,ABCB1,ABCG2,SLCO1B1	1	0	0	0	0
DB00214	approved	small molecule	torasemide	C03CA04	SLC12A1,CYP2C8,CYP2C9,PTGS1,CYP2C19	0	0	0	0	0
DB00215	approved	small molecule	citalopram	N06AB04	SLC6A4,HRH1,ADRA1A,CHRM1,CYP3A4,CYP2C19,CYP2D6,CYP2E1,CYP1A2,CYP2B6,ABCB1,SLC6A3,SLC6A2,SLC6A4	1	0	0	0	0
DB00216	approved, investigational	small molecule	eletriptan	N02CC06	HTR1D,HTR1B,HTR1F,HTR1A,HTR1E,HTR2B,HTR7,CYP3A4,CYP2D6,CYP2C9,CYP2C19,PTGS1,CYP2A6,ABCB1	0	0	0	0	0
DB00217	approved	small molecule	bethanidine	C02CC01	ADRA2A,ADRA2B,ADRA2C,KCNJ1,ADRB1,ADRB2,ADRB3	0	0	0	0	0
DB00220	approved	small molecule	nelfinavir	J05AE04	HIV-1 protease,CYP2B6,CYP2C19,CYP3A4,CYP3A7,CYP3A5,CYP1A2,CYP2C9,CYP2D6,ABCB1,SLC22A1,SLCO1A2,ABCG2,SLCO1B1	0	0	0	0	0
DB00224	approved	small molecule	indinavir	J05AE02	pol,CYP3A4,CYP3A7,CYP3A5,CYP2C19,CYP2C9,CYP2D6,ABCB1,SLC22A1,ABCC1,SLCO1A2,SLCO1B1,ABCC2	0	0	0	0	0
DB00227	approved, investigational	small molecule	lovastatin	C10AA02	HMGCR,ITGAL,HDAC2,CYP3A4,CYP3A5,CYP3A7,PON3,CYP2C8,CYP2C9,CYP2C19,CYP2D6,UGT1A1,UGT1A3,UGT2B7,ABCB1,SLCO1A2,SLCO1B1,ABCC2	0	0	0	0	0
DB00228	approved	small molecule	enflurane	N01AB04	GABRA1,GABRA2,GABRA3,GABRA4,GABRA5,GABRA6,GABRB1,GABRB2,GABRB3,GABRD,GABRE,GABRG1,GABRG2,GABRG3,GABRP,GABRQ,GLRA1,GLRB,KCNN4,KCNA1,ATP2C1,GRIA1,ATP5D,CYP2E1,ALB	0	0	0	0	0
DB00231	approved	small molecule	temazepam	N05CD07	GABRA1,GABRA2,GABRA3,GABRA4,GABRA5,GABRA6,GABRB1,GABRB2,GABRB3,GABRG1,GABRG2,GABRG3,GABRD,GABRE,GABRP,GABRR1,GABRR2,GABRR3,GABRQ,TSPO,GABRA1,GABRA2,GABRA3,GABRA4,GABRA5,GABRA6,GABRB1,GABRB2,GABRB3,GABRD,GABRE,GABRG1,GABRG2,GABRG3,GABRP,GABRQ,CYP2C19,CYP3A4,CYP2B6,CYP2C8,CYP2C9	0	1	0	0	0
DB00233	approved	small molecule	aminosalicylic acid	J04AA01	PTGS2,CHUK,ALOX5,PLA2G2E,folK,MPO	0	0	0	0	0
DB00237	approved, illicit	small molecule	butabarbital		GABRA1,GABRA2,GABRA3,GABRA4,GABRA5,GABRA6,GABRB1,GABRB2,GABRB3,GABRD,GABRE,GABRG1,GABRG2,GABRG3,GABRP,GABRQ,CHRNA4,CHRNA7,GRIA2,GRIK2	0	1	0	0	0
DB00238	approved	small molecule	nevirapine	J05AG01	pol,CYP2B6,CYP3A4,CYP3A5,CYP2C9,CYP2A6,CYP2D6,CYP1A2	0	0	0	1	0
DB00241	approved, illicit	small molecule	butalbital		GABRA1,GABRA2,GABRA3,GABRA4,GABRA5,GABRA6,CHRNA4,CHRNA7,GRIA2,GRIK2,GABRA1,GABRA2,GABRA3,GABRA4,GABRA5,GABRA6,GABRB1,GABRB2,GABRB3,GABRD,GABRE,GABRG1,GABRG2,GABRG3,GABRP,GABRQ	0	1	0	0	0
DB00242	approved, investigational	small molecule	cladribine	L01BB04	RRM1,RRM2,RRM2B,POLA1,POLE,POLE2,POLE3,POLE4,PNP,DCK,SLC22A2,SLC22A1,ABCG2,SLC28A3	0	0	0	0	1
DB00244	approved	small molecule	mesalazine	A07EC02	PTGS2,PTGS1,ALOX5,PPARG,CHUK,IKBKB,MPO,nat	0	0	0	0	0
DB00245	approved	small molecule	benzatropine	N04AC01	CHRM1,SLC6A3,HRH1,CYP2C19,CYP2D6	0	0	0	0	0
DB00246	approved	small molecule	ziprasidone	N05AE04	DRD2,HTR2A,DRD1,DRD5,DRD3,DRD4,HTR1A,HTR1B,HTR1D,HTR1E,HTR2C,HTR3A,HTR6,HTR7,HRH1,ADRA1A,ADRA1B,ADRA2A,ADRA2B,ADRA2C,CHRM1,CHRM2,CHRM3,CHRM4,CHRM5,CYP3A4,CYP3A5,CYP3A7,CYP1A2,CYP2D6	0	1	0	0	0
DB00247	approved	small molecule	methysergide	N02CA04	HTR2B,HTR2C,HTR2A,HTR1A,HTR7,HTR1B,HTR1F,HTR1E	0	0	0	0	0
DB00248	approved	small molecule	cabergoline	G02CB03,N04BC06	DRD2,HTR2B,DRD3,HTR2A,ADRA2B,HTR1D,DRD4,ADRA2A,HTR1A,ADRA2C,DRD5,DRD1,HTR1B,HTR2C,HTR7,ADRA1A,ADRA1B,ADRA1D,ADRB1,ADRB2,DRD1,DRD5,CYP3A4	0	0	0	0	0
DB00250	approved, investigational	small molecule	dapsone	D10AX05,J04BA02	folP2,folP1,CYP3A5,CYP3A4,FMO3,PTGS1,PTGS2,CYP2C8,CYP2C19,NAT2,CYP2C9,CYP3A7,CYP2E1,MPO,CYP2C18	1	0	0	0	0
DB00252	approved	small molecule	phenytoin	N03AB02	SCN5A,SCN1A,CYP2C9,CYP2C19,CYP2C8,CYP2B6,CYP3A4,CYP2C18,CYP3A5,CYP3A7,CYP11B1,ALB,SLCO1C1,ABCB1,ABCC2	1	0	0	0	0
DB00254	approved, investigational	small molecule	doxycycline	A01AB22,J01AA02	rpsI,rpsD,PADI4,B2M,CYP3A4,SLC22A6,SLC22A8,SLC22A11	0	0	0	0	0
DB00255	approved	small molecule	diethylstilbestrol	G03CB02,G03CC05,L02AA01	ESR1,ESRRG,ESR2,COMT,CYP19A1,CYP2A6,CYP3A4,CYP2C8,CYP2C9,CYP2E1,TTR,ABCG2,ABCB1	0	0	0	1	0
DB00257	approved	small molecule	clotrimazole	A01AB18,D01AC01,G01AF02	ERG11,KCNN4,CYP2C8,CYP3A4,CYP2B6,CYP11A1,CYP1A2,CYP2D6,CYP11B1,CYP19A1,CYP2A6,CYP2C19,CYP2C9,CYP2E1,CYP3A7,ABCC3,ABCB1,ABCC2	0	0	0	0	0
DB00259	approved	small molecule	sulfanilamide	D06BA05,J01EB06	folP,CYP2C19,CYP2C9,CYP2D6,CYP2E1,CYP3A4	0	0	0	1	0
DB00264	approved, investigational	small molecule	metoprolol	C07AB02	ADRB1,ADRB2,CYP2D6,CYP2C19,SLC22A2,ABCB1	1	0	0	0	0
DB00268	approved, investigational	small molecule	ropinirole	N04BC04	DRD3,DRD2,DRD4,HTR1A,HTR1D,HTR2B,DRD1,DRD5,HTR1B,HTR2A,HTR2C,ADRA2A,ADRA2B,ADRA2C,CYP1A2,CYP3A4,CYP2D6	0	0	0	0	0
DB00270	approved	small molecule	isradipine	C08CA03	CACNA1C,CACNA2D1,CACNB2,CACNA1H,CACNA2D2,CACNA1D,CACNA1S,CYP3A4	0	0	0	0	0
DB00273	approved	small molecule	topiramate	N03AX11	GABRA1,SCN1A,GRIK1,CA2,CA4,GABRA1,GABRA2,GABRA3,GABRA4,GABRA5,GABRA6,GABRB1,GABRB2,GABRB3,GABRD,GABRE,GABRG1,GABRG2,GABRG3,GABRP,GABRQ,CYP2C19,CYP3A4	0	0	0	0	0
DB00274	approved	small molecule	cefmetazole	J01DC09	mecA,mrcA,mrcB,ftsI,dacA,dacC,ALB,SLC15A1,SLC15A2	0	0	0	0	0
DB00277	approved	small molecule	theophylline	R03DA04	ADORA1,ADORA2A,ADORA2B,PDE4B,PDE5A,PDE4A,PDE3A,HDAC2,CYP3A4,CYP1A2,ADA,CYP2E1,CYP1A1,CYP1B1,CYP2C8,CYP2C9,CYP2D6,SLC22A7	0	0	0	0	0
DB00279	approved	small molecule	liothyronine		THRA,THRB,TTR,SERPINA7,ALB,SLCO1A2,SLCO1B1,SLCO1B3,SLCO4C1,SLC10A1,SLCO1C1,SLCO4A1,SLC22A8,SLC16A10,ABCB1,SLC7A5	0	0	0	0	0
DB00280	approved	small molecule	disopyramide	C01BA03	SCN5A,CHRM1,CHRM2,CHRM3,KCND2,KCND3,CYP3A4,ORM1,SLC22A1,SLC22A2	0	1	0	0	0
DB00281	approved	small molecule	lidocaine	C01BB01,C05AD01,D04AB01,N01BB02,R02AD02,S01HA07,S02DA01	SCN10A,SCN9A,SCN5A,EGFR,CYP3A4,CYP2D6,CYP3A5,CYP3A7,CYP1A2,CYP2C9,CYP2C8,CYP2C18,CYP2A6,CYP2B6,SLC22A5,ABCB1	0	0	0	0	0
DB00285	approved	small molecule	venlafaxine	N06AX16	SLC6A4,SLC6A2,SLC6A3,CYP2D6,CYP3A4,CYP2C9,CYP2C19,CYP2B6,ABCB1,ABCG2	1	0	0	0	0
DB00286	approved	small molecule	conjugated estrogens	G03CA57	ESR1,CYP3A4,CYP1A2,COMT,ABCC3,ABCC4,ABCC1,SLCO1A2,SLC10A1,SLC22A10,SLC22A8,SLCO1C1,SLCO1B1,SLCO2B1,ABCB1,SLC22A6,OSTA,OSTB,ABCC2,SLCO4A1,ABCC11,SLCO1B3,SLC22A11,SLCO3A1,ABCG2	0	0	0	0	0
DB00289	approved	small molecule	atomoxetine	N06BA09	SLC6A2,SLC6A4,SLC6A3,GRIN1,GRIN2A,GRIN2B,GRIN2C,GRIN2D,GRIN3A,GRIN3B,CYP2D6,CYP2C19,CYP3A4	1	0	0	0	0
DB00292	approved	small molecule	etomidate	N01AX07	GABRA1,ADRA2B,GABRA1,GABRA2,GABRA3,GABRA4,GABRA5,GABRA6,GABRB1,GABRB2,GABRB3,GABRD,GABRE,GABRG1,GABRG2,GABRG3,GABRP,GABRQ,CYP11B1,CYP11B2,CYP19A1,SLC2A1	0	0	0	0	0
DB00295	approved, investigational	small molecule	morphine	N02AA01	OPRM1,OPRK1,OPRD1,CYP2D6,CYP2C8,CYP3A4,UGT2B7,UGT1A1,UGT1A8,UGT2B15,UGT2B4,UGT1A3,ABCB1	0	0	0	0	0
DB00296	approved	small molecule	ropivacaine	N01BB09	SCN10A,CYP1A2,CYP2B6,CYP2D6,CYP3A4	0	0	0	0	0
DB00297	approved, investigational	small molecule	bupivacaine	N01BB01	SCN10A,PTGER1,CYP3A4,CYP1A2,CYP2C19,CYP2D6	0	0	0	0	0
DB00300	approved, investigational	small molecule	tenofovir		pol,CYP1A2,AK2,AK4,NME1,NME2,SLC22A6,SLC22A8,ABCC10,ABCC4,ABCC2	0	0	0	0	0
DB00306	approved, illicit	small molecule	talbutal	N05CA07	GABRA1,GABRA2,GABRA3,GABRA4,GABRA5,GABRA6,CHRNA4,CHRNA7,GRIA2,GRIK2,GABRA1,GABRA2,GABRA3,GABRA4,GABRA5,GABRA6,GABRB1,GABRB2,GABRB3,GABRD,GABRE,GABRG1,GABRG2,GABRG3,GABRP,GABRQ	0	0	0	0	0
DB00307	approved, investigational	small molecule	bexarotene	L01XX25	RXRA,RXRB,RXRG,CYP3A4,CYP2C9	0	0	0	0	0
DB00308	approved	small molecule	ibutilide	C01BD05	CACNA1C,CACNB1,KCNH2,CACNA2D1,CACNG1,KCNK1,KCNK6,KCNH6,KCNH7,KCNJ11	0	0	0	0	0
DB00311	withdrawn	small molecule	ethoxzolamide		CA1,CA2,CA4,CA7,SLC22A6	0	0	1	0	0
DB00312	approved	small molecule	pentobarbital	N05CA01	GABRA1,GABRA2,GABRA3,GABRA4,GABRA5,GABRA6,CHRNA4,CHRNA7,GRIA2,GRIK2,GABRA1,GABRA2,GABRA3,GABRA4,GABRA5,GABRA6,GABRB1,GABRB2,GABRB3,GABRD,GABRE,GABRG1,GABRG2,GABRG3,GABRP,GABRQ,GRIN1,GRIN2A,GRIN2B,GRIN2C,GRIN2D,GRIN3A,GRIN3B,CYP3A4,CYP2C19,CYP2A6	0	1	0	1	0
DB00313	approved, investigational	small molecule	valproic acid	N03AG01	HDAC9,ABAT,ACADSB,OGDH,ALDH5A1,SCN1A,SCN10A,SCN11A,SCN2A,SCN3A,SCN4A,SCN5A,SCN7A,SCN8A,SCN9A,SCN1B,SCN2B,SCN3B,SCN4B,HDAC2,CYP2A6,CYP2B6,CYP2C9,CYP3A5,PTGS1,CYP1A2,CYP2C18,CYP2C19,CYP2C8,CYP3A4,UGT1A4,UGT1A8,UGT1A10,UGT1A6,UGT1A3,UGT2B7,UGT2B15,UGT1A9,SLC22A6,SLC22A5,SLC22A8,SLC16A1,SLC22A7	1	0	0	0	0
DB00315	approved, investigational	small molecule	zolmitriptan	N02CC03	HTR1B,HTR1D,HTR1F,HTR1A,CYP1A2,MAOA	0	0	0	0	0
DB00316	approved	small molecule	acetaminophen	N02BE01	PTGS2,PTGS1,CYP1A2,CYP2E1,CYP2D6,CYP1A1,CYP2A6,CYP2C8,CYP2C9,CYP3A4,UGT1A1,UGT1A6,UGT1A9,UGT2B15,UGT1A10,SULT1A1,SULT1A3,SULT1E1,SULT2A1,NAT2,ABCB1,SLC22A6	0	0	0	1	0
DB00317	approved, investigational	small molecule	gefitinib	L01XE02	EGFR,CYP3A4,CYP2D6,CYP3A5,CYP1A1,CYP2C9,CYP2C19,ALB,ORM1,ABCB1,ABCG2	0	0	0	0	0
DB00318	approved, illicit	small molecule	codeine	R05DA04	OPRM1,OPRK1,OPRD1,CYP2D6,CYP3A4,CYP3A5,CYP3A7,UGT2B7,UGT2B4,SLC22A1	1	0	0	1	0
DB00319	approved	small molecule	piperacillin	J01CA12	pbp3,penA,pbp2a,pbp1b,SLC22A6	0	0	0	0	0
DB00320	approved	small molecule	dihydroergotamine	N02CA01	HTR1D,HTR1B,ADRA2A,HTR2B,CYP3A4,ABCB1	0	0	0	0	0
DB00321	approved	small molecule	amitriptyline	N06AA09	SLC6A2,SLC6A4,HTR2A,HTR1A,OPRD1,OPRK1,NTRK1,NTRK2,ADRA1A,ADRA1D,ADRA2A,HRH1,CHRM1,CHRM2,CHRM3,CHRM4,CHRM5,KCNQ2,KCNA1,KCND2,KCND3,HRH2,HRH4,SIGMAR1,HTR2C,ADRA1B,HTR7,HTR1D,OPRM1,HTR1B,HTR6,KCNQ3,ADRB1,ADRB2,ADRB3,CYP2D6,CYP1A2,CYP2C19,CYP2C9,CYP3A4,CYP3A5,CYP2B6,CYP2C8,CYP2E1,ALB,ORM1,ABCB1	1	1	0	0	0
DB00327	approved, illicit	small molecule	hydromorphone	N02AA03	OPRM1,OPRD1,OPRK1,CYP3A4,CYP2C9,CYP2D6,PTGS1,UGT1A9	0	0	0	1	0
DB00328	approved, investigational	small molecule	indomethacin	C01EB03,M01AB01,M02AA23,S01BC01	PTGS1,PTGS2,PLA2G2A,PTGR2,PPARG,GLO1,GPR44,PPARA,CYP2C19,CYP2C9,CES1,UGT1A9,UGT1A1,UGT2B7,ALB,ABCC3,ABCC4,ABCC6,ABCB1,ABCC1,SLCO1A2,SLC22A6,SLC22A8,ABCC2,ABCC11,SLC22A11,SLC10A1,SLC22A7	0	1	0	0	0
DB00331	approved	small molecule	metformin	A10BA02	PRKAB1,SLC22A1,SLC22A2,SLC22A3,SLC47A1,SLC29A4	0	0	0	0	0
DB00332	approved	small molecule	ipratropium bromide	R01AX03,R03BB01	CHRM1,CHRM2,CHRM3,CYP2D6,CYP3A4,SLC22A5,SLC22A4	0	0	0	0	0
DB00333	approved	small molecule	methadone	N07BC02	OPRM1,GRIN3A,CHRNA10,OPRD1,HTR3A,CYP3A4,CYP2C19,CYP3A5,CYP3A7,CYP2D6,CYP2B6,CYP2C8,CYP19A1,CYP1A2,CYP2C18,CYP2C9,ABCB1	0	0	0	0	0
DB00334	approved, investigational	small molecule	olanzapine	N05AH03	HTR2A,DRD2,DRD1,DRD5,DRD3,DRD4,HTR1A,HTR1B,HTR1D,HTR1E,HTR2C,HTR3A,HTR6,HTR7,HRH1,ADRA1A,ADRA1B,ADRA2A,ADRA2B,ADRA2C,CHRM1,CHRM2,CHRM3,CHRM4,CHRM5,HTR2B,HTR5A,DRD1,DRD5,HRH2,HRH4,GABRA1,GABRA2,GABRA3,GABRA4,GABRA5,GABRA6,GABRB1,GABRB2,GABRB3,GABRD,GABRE,GABRG1,GABRG2,GABRG3,GABRP,GABRQ,ADRB1,ADRB2,ADRB3,CYP1A2,CYP2D6,FMO3,CYP2C19,CYP2C9,CYP3A4,ALB,ORM1,ABCB1	0	1	0	0	0
DB00336	approved	small molecule	nitrofural	B05CA03,D08AF01,D09AA03,P01CC02,S01AX04,S02AA02	poxB,gor,mdh,citC,XDH,CYP2D6	0	0	0	1	0
DB00338	approved, investigational	small molecule	omeprazole	A02BC01	ATP4A,CYP2C19,CYP3A4,CYP1A2,CYP2C9,CYP2C18,CYP2C8,CYP2D6,CYP11A1,CYP1A1,CYP1B1,ABCC3,ABCB1,ABCG2	1	1	0	0	0
DB00340	approved	small molecule	metixene	N04AA03	CHRM1,CHRM4,CHRM5,CHRM2,CHRM3	0	0	0	0	0
DB00342	withdrawn	small molecule	terfenadine		HRH1,KCNH2,CHRM3,CHRM1,CHRM5,CHRM4,CHRM2,CYP3A4,CYP3A7,CYP2D6,CYP2C9,CYP3A5,CYP2C8,CYP2J2,ABCB1	0	0	1	1	0
DB00343	approved	small molecule	diltiazem	C05AE03,C08DB01	CACNG1,CYP3A4,CYP3A5,CYP3A7,CYP2C19,CYP2D6,CYP2C8,CYP2C9,ABCB1	0	0	0	0	0
DB00345	approved	small molecule	aminohippurate	V04CH30	SLC22A2,SLC22A1,SLC22A5,ABCB1,SLC22A6,SLC22A8,ABCC2,SLC22A4,SLC22A11,SLCO3A1,SLCO1B1,ABCC1,SLCO1A2,SLC16A1,SLC22A7	0	0	0	0	0
DB00346	approved, investigational	small molecule	alfuzosin	G04CA01	ADRA1A,ADRA1B,ADRA1D,KCNH2,CYP3A4	0	0	0	0	0
DB00347	approved	small molecule	trimethadione	N03AC02	CACNA1G,CYP2E1,CYP3A4,CYP2C8,CYP2C9,CYP2C19	0	0	0	0	0
DB00349	approved, illicit	small molecule	clobazam	N05BA09	GABRA1,GABRA2,GABRA3,GABRA4,GABRA5,GABRA6,GABRB1,GABRB2,GABRB3,GABRD,GABRE,GABRG1,GABRG2,GABRG3,GABRP,GABRQ,CYP3A4,CYP2C19,CYP2B6,CYP2C18,SLC6A1,SLC6A11,ABCB1	1	0	0	0	0
DB00356	approved	small molecule	chlorzoxazone	M03BB03	KCNMA1,CYP2E1,CYP1A1,CYP1A2,CYP2A6,CYP3A4,CYP2D6	0	1	0	0	0
DB00357	approved	small molecule	aminoglutethimide	L02BG01	CYP19A1,CYP11A1,CYP3A4,CYP1A2,CYP2C19	0	0	0	1	0
DB00358	approved	small molecule	mefloquine	P01BC02	HBA1,ADORA2A,CYP3A4,BCHE,CYP19A1,CYP2D6,ACHE,ABCB1	0	0	0	0	0
DB00360	approved, investigational	small molecule	tetrahydrobiopterin	A16AX07	NOS3,PAH,TH,TPH1,PTGS2	0	0	0	0	0
DB00363	approved	small molecule	clozapine	N05AH02	DRD2,HTR2A,DRD1,DRD3,DRD4,HTR1A,HTR1B,HTR1D,HTR1E,HTR2C,HTR3A,HTR6,HTR7,HRH1,HRH4,ADRA1A,ADRA1B,ADRA2A,ADRA2B,ADRA2C,CHRM1,CHRM2,CHRM3,CHRM4,CHRM5,CALY,CYP1A2,CYP2D6,CYP2C9,CYP3A4,CYP2C19,CYP2A6,CYP2C8,FMO3,UGT1A4,CYP2E1,CYP1A1,CYP1B1,ABCB1	1	1	0	1	0
DB00364	approved	small molecule	sucralfate	A02BX02	FGF2,EGF,FGA,FGB,FGG,ALB	0	0	0	0	0
DB00365	withdrawn	small molecule	grepafloxacin		gyrA,parC,CYP1A2,CYP3A4,ABCB1,ABCC1,SLC22A6,SLC22A2,SLC22A5,ABCC2	0	0	1	1	0
DB00367	approved, investigational	small molecule	levonorgestrel	G03AC03,G03AD01	PGR,SRD5A1,ESR1,AR,CYP3A4,CYP19A1	0	0	0	0	0
DB00368	approved	small molecule	norepinephrine	C01CA03	ADRA1A,ADRA1B,ADRA1D,ADRA2A,ADRA2B,ADRA2C,ADRB1,ADRB2,ADRB3,PAH,SLC18A2,SLC18A1,CYP1A2,SLC6A2,SLC22A2,SLC22A3,SLC22A5,SLC22A1,POU5F1	0	0	0	0	0
DB00370	approved	small molecule	mirtazapine	N06AX11	HTR2A,HTR3A,ADRA2A,HTR2C,OPRK1,HRH1,ADRA2C,HTR7,ADRA1A,ADRA1B,ADRA1D,DRD2,DRD3,SLC6A2,SLC6A4,SLC6A3,HTR2B,DRD1,DRD5,HRH3,ADRA1A,ADRB1,ADRB2,CYP3A4,CYP2D6,CYP1A2,CYP2C9,CYP2C8	0	0	0	0	0
DB00371	approved, illicit	small molecule	meprobamate	N05BC01	GABRA1,GABRA2,GABRA3,GABRA4,GABRA5,GABRA6,GABRA1,GABRA2,GABRA3,GABRA4,GABRA5,GABRA6,GABRB1,GABRB2,GABRB3,GABRD,GABRE,GABRG1,GABRG2,GABRG3,GABRP,GABRQ,CYP2C19,CYP2E1,ABCB1	0	1	0	1	0
DB00373	approved	small molecule	timolol	C07AA06,S01ED01	ADRB1,ADRB2,E,CYP2D6,CYP2C19,ABCB1	0	0	0	0	0
DB00376	approved	small molecule	trihexyphenidyl	N04AA01	CHRM1,CHRM2,CHRM3,CHRM4,CHRM5	0	1	0	0	0
DB00379	approved	small molecule	mexiletine	C01BB02	SCN5A,AHR,CYP1A2,CYP2D6,CYP2B6,CYP2E1,CYP3A4	0	0	0	0	0
DB00381	approved	small molecule	amlodipine	C08CA01	CACNA1C,CACNA2D1,CACNB2,CACNA1D,CACNA1S,CACNA1B,CACNA2D3,CACNB1,CA1,SMPD1,CYP3A4,CYP3A5,CYP3A7,CYP1A2,CYP1A1,CYP2B6,CYP2A6,CYP2C8,CYP2C9,CYP2D6,ABCB1	0	0	0	0	0
DB00384	approved	small molecule	triamterene	C03DB02	SCNN1G,SCNN1A,SCNN1B,SCNN1D,CYP1A2	0	0	0	0	0
DB00388	approved	small molecule	phenylephrine	C01CA06,R01AA04,R01AB01,R01BA03,S01FB01,S01GA05	ADRA1A,ADRA1B,ADRA1D,MAOA,CYP1A2	0	0	0	1	0
DB00390	approved	small molecule	digoxin	C01AA05	ATP1A1,CYP11A1,CYP3A4,ABCB1,SLCO4C1,SLC22A8,SLCO2B1,ABCB11,SLCO1A2,OSTA,OSTB,SLCO4A1,SLCO1B3,SLCO1C1,SLCO1B1	0	1	0	0	0
DB00393	approved	small molecule	nimodipine	C08CA06	CACNA1C,CACNA1D,CACNA1F,CACNA1S,CACNB1,CACNB2,CACNB3,CACNB4,NR3C2,AHR,CYP3A4,CYP3A5	0	0	0	0	0
DB00396	approved	small molecule	progesterone	G03DA04	PGR,ESR1,NR3C2,CYP17A1,OPRK1,CYP3A5,CYP2C9,CYP3A7,CYP2C19,CYP3A4,CYP17A1,CYP1A1,CYP1A2,CYP1B1,CYP2A6,CYP2C8,CYP2D6,ABCB1,SLC22A2,SLC22A1,SLC22A3,ABCB11,ABCC1,SLC10A1	0	0	0	0	0
DB00397	approved, withdrawn	small molecule	phenylpropanolamine	R01BA01	ADRA1A,ADRA2A,DRD1,ADRB1,ADRB2,MAOA,CYP1A2	0	0	1	1	0
DB00398	approved, investigational	small molecule	sorafenib	L01XE05	BRAF,RAF1,FLT4,KDR,FLT3,PDGFRB,KIT,FGFR1,RET,FLT1,CYP2C9,CYP3A5,CYP3A7,CYP3A4,CYP2B6,CYP2C8,CYP1A2,CYP2C19,CYP2D6,UGT1A9,UGT1A1,ABCG2,ABCC4,ABCB1,ABCC2,RALBP1	0	0	0	0	0
DB00400	approved	small molecule	griseofulvin	D01AA08,D01BA01	TUB2,TUB1,KRT12,CYP1A2,CYP3A4	0	0	0	0	0
DB00401	approved	small molecule	nisoldipine	C08CA07	CACNA1C,CACNA2D1,CACNB2,CACNA1D,CACNA1S,CYP3A4,CYP3A5,CYP3A7,CYP1A2,ABCB1	0	0	0	0	0
DB00402	approved	small molecule	eszopiclone	N05CF04	GABRA1,GABRA2,GABRA3,GABRA5,TSPO,GABRA1,GABRA2,GABRA3,GABRA4,GABRA5,GABRA6,GABRB1,GABRB2,GABRB3,GABRD,GABRE,GABRG1,GABRG2,GABRG3,GABRP,GABRQ,CYP3A4,CYP2C8,CYP2C9,PTGS1	0	1	0	0	1
DB00404	approved, illicit, investigational	small molecule	alprazolam	N05BA12	GABRA1,GABRA2,GABRA3,GABRA4,GABRA5,GABRA6,GABRB1,GABRB2,GABRB3,GABRD,GABRE,GABRG1,GABRG2,GABRG3,GABRP,GABRQ,CYP2C9,CYP3A7,CYP3A4,CYP3A5	0	1	0	0	0
DB00408	approved	small molecule	loxapine	N05AH01	DRD2,DRD1,HTR2A,HTR2C,HTR1A,HTR1B,HTR1D,HTR1E,HTR3A,HTR5A,HTR6,HTR7,ADRA1A,ADRA1B,ADRA2A,ADRA2B,ADRA2C,ADRB1,CHRM1,CHRM2,CHRM3,CHRM4,CHRM5,DRD1,DRD5,DRD3,DRD4,DRD5,HRH1,HRH2,HRH4,SLC6A4,SLC6A2,SLC6A3	0	1	0	0	0
DB00409	approved, withdrawn	small molecule	remoxipride	N05AL04	DRD2,DRD4,DRD3,HTR2A,SIGMAR1,CYP2D6	0	0	1	1	0
DB00412	approved, investigational	small molecule	rosiglitazone	A10BG02	PPARG,ACSL4,CYP2C8,CYP2C9,PTGS1,CYP1A2,CYP2A6,CYP2C19,CYP2D6,ALB,SLCO1B1	0	0	0	0	0
DB00413	approved, investigational	small molecule	pramipexole	N04BC05	DRD3,DRD2,DRD4,ADRA2B,HTR1A,HTR1D,ADRA2A,HTR1B,HTR2A,HTR2B,HTR2C,ADRA2C,DRD1,DRD5,SLC22A2,SLC22A1	0	0	0	0	0
DB00415	approved	small molecule	ampicillin	J01CA01,S01AA19	pbp2a,pbp1b,pbp3,pbpA,penA,SLC15A1,SLC15A2,TEK,ALB,SLC22A5,SLC15A1,SLC15A2,SLC16A1	0	0	0	0	0
DB00418	approved	small molecule	secobarbital	N05CA06	GABRA1,GABRA2,GABRA3,GABRA4,GABRA5,GABRA6,CHRNA4,CHRNA7,GRIA2,GRIK2,GRIN1,GRIN2A,GRIN2B,GRIN2C,GRIN2D,GRIN3A,GRIN3B,CYP2C9,CYP2C8,CYP1A2	0	1	0	0	0
DB00420	approved	small molecule	promazine	N05AA03	DRD2,HTR2A,HTR2C,DRD1,DRD4,CHRM4,CHRM2,CHRM3,CHRM1,ADRA1B,CHRM5,ADRA1A,HRH1,ADRA1D,CYP2C19,CYP1A2,CYP3A4,CYP2C9	0	0	0	0	0
DB00421	approved	small molecule	spironolactone	C03DA01	NR3C2,AR,PGR,NR3C1,CYP11B2,SRD5A1,SRD5A2,SRD5A3,SHBG,CACNG1,CACNA2D1,CACNA2D2,CACNA2D3,CACNA1C,CACNA1D,CACNA1F,CACNA1S,CACNB1,CACNB2,CACNB3,CACNB4,CACNA1B,CACNA1A,CACNA1G,CACNA1H,CACNA1I,CACNB1,CYP2C8,CYP11B1,ABCC2,ABCB1,SLCO1A2	0	0	0	0	0
DB00422	approved, investigational	small molecule	methylphenidate	N06BA04	SLC6A3,SLC6A2,SLC6A4,CYP2D6,CES1A1a	0	0	0	1	0
DB00425	approved	small molecule	zolpidem	N05CF02	GABRA1,GABRA2,GABRA3,CYP3A5,CYP3A7,CYP3A4,CYP1A2,CYP2C9,CYP2C19,CYP2D6,PTGS1	0	1	0	0	0
DB00428	approved	small molecule	streptozocin	L01AD04	SLC2A2,BT_4395,CYP1A1,CYP1A2,CYP2E1,ABCB1	0	0	0	0	0
DB00430	approved	small molecule	cefpiramide	J01DD11	ftsI,mrcB,mrcA,ponB,dacC,mrcA,mecA,ALB	0	0	0	0	0
DB00431	approved, withdrawn	small molecule	lindane	P03AB02	GABRB1,GLRA1,GLRA2,GLRA3,GLRB	0	0	1	1	0
DB00434	approved	small molecule	cyproheptadine	R06AX02	HRH1,HTR2A,HTR2C,CHRM1,CHRM2,CHRM3,UGT1A3	0	1	0	1	0
DB00435	approved	small molecule	nitric oxide	R07AX01	GUCY1A2,ALDH2,CYP1A2,CYP2B6,CYP3A4	0	0	0	0	0
DB00436	approved	small molecule	bendroflumethiazide	C03AA01	SLC12A3,KCNMA1,CA1,CA2,CA4,TPMT	0	0	0	0	0
DB00437	approved	small molecule	allopurinol	M04AA01	XDH,AOX1,XDH,SLC22A8,SLC22A7	0	0	0	0	0
DB00438	approved	small molecule	ceftazidime	J01DD02	ftsI,pbp3,mrcA,pbpA,mrcB,ponB,pbpA,mrdA,pbpG,SLC22A5,SLC15A1,SLC15A2,SLC22A6	0	0	0	0	0
DB00439	withdrawn	small molecule	cerivastatin		HMGCR,CYP3A4,CYP3A5,CYP3A7,CYP2C8,CYP2D6,CYP2C19,CYP2C9,CYP2B6,ABCB1,ABCC2,ABCG2,SLCO1B1	0	0	1	1	0
DB00440	approved	small molecule	trimethoprim	J01EA01	TYMS,DHFR,CYP2C9,CYP3A4,CYP2C8,ABCB1	1	0	0	0	0
DB00441	approved	small molecule	gemcitabine	L01BC05	RRM1,TYMS,CMPK1,CDA,DCK,ABCB1,ABCC10,SLC29A1,SLC28A1,SLC29A2,SLC28A3	0	0	0	0	0
DB00444	approved	small molecule	teniposide	L01CB02	TOP2A,CYP3A4,CYP2C9,CYP2C19,CYP3A5,ABCC6,ABCG2	0	0	0	0	0
DB00445	approved	small molecule	epirubicin	L01DB03	CHD1,TOP2A,UGT2B7,PLA2G4A,ABCC1	0	0	0	0	0
DB00446	approved	small molecule	chloramphenicol	D06AX02,D10AF03,G01AA05,J01BA01,S01AA01,S02AA01,S03AA08	rplP,draA,CD55,CYP3A4,CYP3A5,CYP3A7,CYP2C19,cat3,cat,CYP2C8,CYP2C9,SLC22A6	0	0	0	1	0
DB00448	approved, investigational	small molecule	lansoprazole	A02BC03	ATP4A,CYP3A4,CYP2C19,CYP2C9,CYP1A1,CYP1A2,CYP1B1,CYP2C18,CYP2C8,CYP2D6,CYP4A11,ABCB1,ABCG2	1	1	0	0	0
DB00449	approved	small molecule	dipivefrin		ADRA1A,ADRA2A,ADRB2,BCHE,ACHE	0	0	0	0	0
DB00451	approved	small molecule	levothyroxine		THRA,THRB,CYP2C8,CYP3A4,TTR,SERPINA7,ALB,SLCO1C1,SLC16A2,ABCB1,SLCO1A2,SLCO1B1,SLCO1B3,SLCO4A1,SLCO4C1,SLC7A5	0	0	0	0	0
DB00454	approved	small molecule	pethidine	N02AB02	OPRK1,GRIN1,GRIN2B,GRIN2A,GRIN2C,GRIN2D,CHRM1,CHRM2,CHRM3,CHRM4,CHRM5,OPRM1,SLC6A3,SLC6A2,SLC6A4,CYP3A4,CYP2C19,CYP2B6,CYP2D6,ALB,ORM1	0	0	0	0	0
DB00455	approved	small molecule	loratadine	R06AX13	HRH1,CYP2C8,CYP3A4,CYP2C19,CYP2D6,CYP2C9,ABCB1	0	0	0	0	0
DB00456	approved	small molecule	cefalotin	J01DB03	pbpA,pbp1b,pbp3,pbp2a,penA,pbpA,ampC,ALB,SLC22A5,SLC15A1,SLC15A2,SLC22A6,SLC22A8,SLC22A11,SLC22A7	0	0	0	0	0
DB00457	approved	small molecule	prazosin	C02CA01	ADRA1A,ADRA1B,ADRA1D,KCNH2,KCNH6,KCNH7,ADRA2A,ADRA2B,CYP1A1,ORM1,SLC22A2,SLC22A1,SLC22A3,ABCB1,ABCG2	0	1	0	0	0
DB00458	approved	small molecule	imipramine	N06AA02	SLC6A2,SLC6A4,HTR2A,HRH1,ADRA1A,ADRA1D,CHRM1,CHRM2,CHRM3,CHRM4,CHRM5,KCND2,KCND3,snf,HTR2C,ADRA1B,HTR7,DRD1,DRD5,DRD2,KCNH2,SLC6A3,HTR1A,HTR6,CYP2D6,CYP2C19,CYP1A2,CYP3A4,CYP3A7,CYP2B6,CYP2C18,CYP2E1,ORM1,ABCB1,SLC22A1,SLC22A2,SLC22A3,SLC22A4	1	1	0	0	0
DB00459	approved	small molecule	acitretin	D05BB02	RXRA,RARA,RARB,RARG,RXRB,RXRG,RBP1,CYP26A1,ALB	0	0	0	0	0
DB00463	withdrawn	small molecule	metharbital		GABRA1,GABRA2,GABRA3,GABRA4,GABRA5,GABRA6,CHRNA4,CHRNA7,GRIA2,GRIK2,GABRA1,GABRA2,GABRA3,GABRA4,GABRA5,GABRA6,GABRB1,GABRB2,GABRB3,GABRD,GABRE,GABRG1,GABRG2,GABRG3,GABRP,GABRQ	0	0	1	0	0
DB00466	experimental	small molecule	picrotoxin		GABRR1,GABRA1,GLRA2,GLRA3,CYP1A1,GLUL	0	0	0	0	0
DB00468	approved	small molecule	quinine	P01BC01	GP9,KCNN4,CYP3A5,CYP1A2,CYP2C8,CYP2C9,CYP2C19,CYP2E1,CYP3A7,CYP1A1,CYP3A4,CYP2D6,SLC22A2,SLC22A1,SLC22A5,ABCB1,SLCO1A2,SLC22A4	0	0	0	1	0
DB00470	approved, illicit	small molecule	dronabinol	A04AD10	CNR1,CNR2,CYP3A4,CYP2C9,CYP2C19,PTGS1,CYP1A1,CYP2A6,ABCB1,ABCG2	0	0	0	0	0
DB00471	approved	small molecule	montelukast	R03DC03	CYSLTR1,ALOX5,CYP2C8,CYP3A4,CYP2C9,PTGS1,CYP2A6,SLCO2B1	0	0	0	0	0
DB00472	approved	small molecule	fluoxetine	N06AB03	SLC6A4,CYP2C19,CYP2D6,CYP2C9,CYP2B,CYP1A2,CYP3A4,CYP2B6,CYP3A5,ALB,ORM1,ABCB1	1	0	0	0	0
DB00475	approved, illicit	small molecule	chlordiazepoxide	N05BA02	GABRA1,GABRA2,GABRA3,GABRA4,GABRA5,GABRA6,GABRB1,GABRB2,GABRB3,GABRD,GABRE,GABRG1,GABRG2,GABRG3,GABRP,GABRQ,CYP3A4,CYP2D6	0	1	0	0	0
DB00476	approved	small molecule	duloxetine	N06AX21	SLC6A4,SLC6A2,SLC6A3,CYP1A2,CYP2D6	0	0	0	0	1
DB00477	approved	small molecule	chlorpromazine	N05AA01	DRD2,DRD1,HTR2A,HTR1A,ADRA1A,ADRA1B,HRH1,KCNH2,DRD1,DRD5,DRD3,DRD4,DRD5,HTR2C,HTR2A,HTR2B,HTR2C,ADRA1A,ADRA1B,ADRA1D,ADRA2A,ADRA2B,ADRA2C,CHRM1,CHRM3,SMPD1,CALM1,ORM1,ORM2,HTR6,HTR7,HRH4,CYP2D6,CYP1A2,CYP3A4,CYP2E1,BCHE,ALB,ABCB1,SLC22A1,ABCB11	0	0	0	0	0
DB00480	approved	small molecule	lenalidomide	L04AX04	CRBN,TNFSF11,CDH5,PTGS2,ABCB1	1	0	0	0	1
DB00481	approved, investigational	small molecule	raloxifene	G03XC01	ESR1,ESR2,CYP2B6,CYP2C8,AOX1,CYP19A1,CYP3A4	0	0	0	0	0
DB00482	approved, investigational	small molecule	celecoxib	L01XX33,M01AH01	PTGS2,PDPK1,CYP2C9,CYP3A4,CYP2D6,ALB,ORM1,ABCC4	1	0	0	0	0
DB00485	approved	small molecule	dicloxacillin	J01CF01	LMHCC_2184,LMHCC_2773,pbp1b,pbp2a,pbp3,pbpA,penA,CYP3A4,SLC15A1,SLC15A2	0	0	0	0	0
DB00487	approved	small molecule	pefloxacin	J01MA03	parC,gyrA,TOP2A,topA,CYP1A2	0	0	0	0	0
DB00490	approved, investigational	small molecule	buspirone	N05BE01	HTR1A,DRD2,CYP3A4,CYP3A5,CYP3A7,CYP2D6,ABCB1	0	0	0	0	0
DB00491	approved	small molecule	miglitol	A10BF02	MGAM,GAA,GANAB,GANC,AMY2A	0	0	0	0	0
DB00493	approved	small molecule	cefotaxime	J01DD01	pbp1b,pbp2a,pbpC,pbpA,penA,SLC22A6,SLC22A8,SLC22A11,SLC22A7,SLC15A1,ALB,SLC15A2,SLC15A1,SLC15A2,SLC22A6,SLC22A8,SLC22A11,SLC22A7	0	0	0	0	0
DB00495	approved	small molecule	zidovudine	J05AF01	pol,TERT,CYP2A6,CYP2C19,CYP2C8,CYP2C9,CYP3A4,TK1,UGT2B7,ALB,SLC22A2,SLC22A6,SLC22A7,SLC22A8,SLC22A11,SLC28A1,SLC29A2,ABCB1,ABCC4,ABCC5,ABCG2	0	0	0	0	0
DB00496	approved, investigational	small molecule	darifenacin	G04BD10	CHRM3,CHRM1,CHRM2,CHRM4,CHRM5,CYP3A4,CYP2D6	0	0	0	0	0
DB00497	approved, illicit, investigational	small molecule	oxycodone	N02AA05	OPRM1,OPRK1,OPRD1,ORM1,ORM2,CYP2D6,CYP3A4,CYP3A5,CYP3A7	0	0	0	0	0
DB00499	approved	small molecule	flutamide	L02BB01	AR,AHR,CYP3A4,CYP1A2,CYP1A1,CYP1B1,CYP2C19,CYP3A5	0	0	0	0	0
DB00500	approved	small molecule	tolmetin	M01AB03,M02AA21	PTGS2,PTGS1,TDO2,MPO,SLC22A6	0	1	0	0	0
DB00501	approved	small molecule	cimetidine	A02BA01	HRH2,CYP1A2,CYP2C19,CYP3A4,CYP3A5,CYP3A7,CYP2D6,CYP11B1,CYP2C8,CYP2C9,CYP2E1,FMO3,FMO1,ABCB1,SLC22A2,SLC22A1,SLC22A3,SLC22A5,ABCB11,SLC22A6,SLC22A8,SLC47A1,SLC22A4,SLC22A11,SLC22A7	0	0	0	0	0
DB00502	approved	small molecule	haloperidol	N05AD01	DRD2,DRD1,GRIN2B,HTR2A,DRD3,CYP3A5,CYP3A7,CYP1A2,CYP2D6,CYP3A4,CBR1,UGT1A9,CYP1A1,CYP2C19,CYP2C9,ABCB1	0	1	0	0	0
DB00503	approved, investigational	small molecule	ritonavir	J05AE03	pol,CYP2C19,CYP2B6,CYP2C8,CYP3A7,CYP3A5,CYP3A4,CYP2D6,CYP2C9,CYP1A2,CYP2E1,ABCB1,ABCC1,ABCC2,SLCO1A2,ABCG2,SLCO1B1	0	0	0	0	0
DB00508	approved	small molecule	triflupromazine	N05AA05	DRD1,DRD2,HTR2B,CHRM1,CHRM2,BCHE,ABCB1	0	0	0	0	0
DB00509	approved	small molecule	dextrothyroxine	C10AX01	THRA,THRB,TPO,SLCO1B1,SLCO1C1,SLCO4A1,SLCO4C1,SLC7A5	0	0	0	0	0
DB00514	approved	small molecule	dextromethorphan	R05DA09	SIGMAR1,OPRS1,GRIN3A,CHRNA2,SLC6A4,PGRMC1,CHRNA3,CHRNA4,CHRNB4,CHRNB2,CHRNA7,OPRM1,OPRD1,OPRK1,CYBB,CYBA,NCF1,NCF2,NCF4,RAC1,RAC2,SLC6A2,CYP3A4,CYP2D6,CYP3A5,CYP3A7,CYP2B6,CYP2C19,CYP2C9,CYP2C8,CYP2E1,ABCB1	1	0	0	0	0
DB00515	approved	small molecule	cisplatin	L01XA01	MPO,XDH,CYP4A11,PTGS2,nat,CYP2C9,CYP2B6,BCHE,GSTT1,MT1A,MT2A,SOD1,GSTP1,NQO1,GSTM1,ABCC3,ABCC5,ABCC2,SLC22A2,SLC31A1,SLC31A2,ABCC6,ABCB1,ATP7B,ATP7A,ABCG2	1	0	0	0	0
DB00518	approved	small molecule	albendazole	P02CA03	TUBA1A,TUBB2C,SO_0970,CYP3A4,CYP1A1,CYP1A2,ABCB1	0	0	0	0	0
DB00520	approved	small molecule	caspofungin	J02AX04	fksA,CYP3A4,SLC22A1,ABCB1,SLC22A6,SLCO1B1,SLCO1B3	0	0	0	0	0
DB00523	approved, investigational	small molecule	alitretinoin	D11AH04,L01XX22	RARA,RXRA,RARB,RXRB,RARG,RXRG,CYP1A2,CRABP2,CRABP1,ABCB1	0	0	0	0	0
DB00526	approved, investigational	small molecule	oxaliplatin	L01XA03	CYP1A1,CYP1A2,CYP1B1,CYP2E1,GSTT1,MT1A,MT2A,MPO,SOD1,GSTP1,GSTM1,NQO1,SLC22A2,SLC22A1,SLC31A1,SLC22A3,ABCG2,ABCC2,ATP7B,ATP7A	0	0	0	0	0
DB00528	approved, investigational	small molecule	lercanidipine	C08CA13	CACNG1,CYP3A7,CYP3A4,CYP3A5,CYP2D6	0	0	0	0	0
DB00530	approved, investigational	small molecule	erlotinib	L01XE03	EGFR,NR1I2,CYP3A4,CYP3A5,CYP1A2,CYP1A1,CYP2D6,CYP2C8,CYP1B1,UGT1A1,ALB,ORM1,ABCG2,ABCB1	1	0	0	0	0
DB00531	approved, investigational	small molecule	cyclophosphamide	L01AA01	CYP2C9,CYP3A4,CYP2B6,CYP2C19,CYP2A6,CYP2C18,CYP2C8,CYP2D6,CYP3A7,CYP3A5,ABCB1	0	0	0	0	0
DB00532	investigational, withdrawn	small molecule	mephenytoin	N03AB04	SCN5A,CYP2C19,CYP2B6,CYP1A2,CYP2D6,CYP2C8,CYP2C9	0	0	1	0	0
DB00533	investigational, withdrawn	small molecule	rofecoxib	M01AH02	PTGS2,ELN,CYP1A2,CYP3A4,PTGS1,CYP2C8,CYP2C9,ABCC4	0	0	1	1	0
DB00535	approved	small molecule	cefdinir	J01DD15	penA,pbp3,MPO,SLC22A5,SLC15A1,SLC15A2	0	0	0	0	0
DB00536	approved	small molecule	guanidine		argG,GAMT,RNASE1,DLG4,E,ALDH2,rocF,SLC22A2,SLC22A1,SLC22A3,SLC22A5,SLC22A8,SLC22A4	0	0	0	0	0
DB00537	approved, investigational	small molecule	ciprofloxacin	J01MA02,S01AE03,S02AA15,S03AA07	parC,gyrA,TOP2A,KCNH2,CYP3A4,CYP3A5,CYP3A7,CYP1A2,ABCB1	0	0	0	0	0
DB00539	approved, investigational	small molecule	toremifene	L02BA02	ESR1,CYP3A4,CYP1A1,CYP1A2,ABCB1	0	0	0	0	0
DB00540	approved	small molecule	nortriptyline	N06AA10	SLC6A2,SLC6A4,HTR2A,HTR1A,HRH1,ADRA1A,ADRA1D,CHRM1,CHRM2,CHRM3,CHRM4,CHRM5,HTR2C,HTR6,ADRA1B,ADRA2A,ADRA2B,ADRA2C,ADRB1,ADRB2,ADRB3,DRD2,PGRMC1,SIGMAR1,Htr2c,CYP2D6,CYP3A4,CYP1A2,CYP2C19,CYP2C9,CYP3A5,PTGS1,CYP2E1,ALB,ORM1	1	1	0	0	0
DB00541	approved, investigational	small molecule	vincristine	L01CA02	TUBB,TUBA4A,CYP3A5,CYP3A7,CYP3A4,ABCB1,ABCC3,SLC22A3,ABCC1,ABCC10,ABCC2,ABCB11,ABCG2,RALBP1	0	0	0	0	0
DB00543	approved	small molecule	amoxapine	N06AA17	SLC6A2,SLC6A4,DRD2,DRD1,ADRA2A,ADRA1A,CHRM1,GABRA1,HTR2A,HTR2C,HTR6,HTR7,DRD3,DRD4,HRH1,ADRA1A,ADRA1B,ADRA1D,CHRM1,CHRM2,CHRM3,CHRM4,CHRM5,HTR2B,HTR3A,HTR1A,HTR1B,ADRA2A,ADRA2B,ADRA2C,HRH4,GABRA1,GABRA2,GABRA3,GABRA4,GABRA5,GABRA6,GABRB1,GABRB2,GABRB3,GABRD,GABRE,GABRG1,GABRG2,GABRG3,GABRP,GABRQ,SLC6A3,CYP2D6,ORM1	0	1	0	0	0
DB00544	approved	small molecule	fluorouracil	L01BC02	TYMS,CYP2C9,CYP1A2,TYMP,DPYD,UPP1,UPP2,CYP2A6,CYP2C8,MTHFR,TYMS,UMPS,PPAT,ALB,SLC22A7,SLC29A1,ABCG2,ABCC3,ABCC4,ABCC5	1	0	0	0	0
DB00546	approved	small molecule	adinazolam	N05BA07	GABRA1,GABRA2,GABRA3,GABRA5,GABRG1,GABRG2,GABRG3,GABRB1,GABRB2,GABRB3,GABRD,GABRE,GABRP,GABRR1,GABRR2,GABRR3,CYP2C19,CYP3A4	0	0	0	0	0
DB00548	approved	small molecule	azelaic acid	D10AX03	trxB,AKR1D1,SRD5A2,TYR,polA	0	0	0	0	0
DB00549	approved, investigational	small molecule	zafirlukast	R03DC01	CYSLTR1,CYP2C9,CYP2C8,PTGS1,CYP3A4,CYP1A2,CYP2C19,CYP2D6,CYP2E1,ABCG2	0	0	0	0	0
DB00553	approved	small molecule	methoxsalen	D05AD02,D05BA02	CYP1A2,CYP2A6,CYP1A1,CYP2A13,CYP3A4	0	0	0	0	0
DB00554	approved, investigational	small molecule	piroxicam	M01AC01,M02AA07,S01BC06	PTGS2,PTGS1,CYP2C9,CYP2C8,ALB,SLC22A6,SLC22A8,SLC22A11	0	1	0	0	0
DB00559	approved, investigational	small molecule	bosentan	C02KX01	EDNRA,EDNRB,CYP3A4,CYP2C9,ABCB11	0	0	0	0	0
DB00562	approved	small molecule	benzthiazide		SLC12A3,CA1,CA2,CA4,CA9,CA12	0	0	0	0	0
DB00563	approved	small molecule	methotrexate	L01BA01,L04AX03	DHFR,MTHFR,AOX1,PGD,FPGS,GGH,DHFR,TYMS,ATIC,ALB,ABCC3,ABCC4,ABCC1,SLC22A6,ABCC10,SLC22A8,ABCC2,ABCB1,SLCO1A2,SLC16A1,ABCC11,SLCO1B3,SLC22A11,SLCO1C1,SLCO3A1,ABCG2,SLC22A7,SLCO1B1,SLC46A1,SLCO4C1,SLC19A1,FOLR1	0	0	0	0	0
DB00564	approved, investigational	small molecule	carbamazepine	N03AF01	SCN5A,CYP3A4,CYP2C8,CYP1A2,CYP2C9,CYP2C19,CYP2B6,CYP3A5,CYP3A7,UGT2B7,ABCB1,RALBP1,ABCC2	1	0	0	0	0
DB00567	approved	small molecule	cephalexin	J01DB01	pbp3,pbp2a,pbp1b,penA,pbpA,CYP2D6,CYP3A4,ALB,SLC22A5,SLC15A1,SLC15A2,SLC22A6,SLC47A1,SLC22A8	0	0	0	0	0
DB00568	approved	small molecule	cinnarizine	N07CA02	HRH1,CACNA1C,CACNA1D,CACNA1F,CACNA1S,CACNA1G,CACNA1H,CACNA1I,DRD2,DRD1,DRD5,CHRM1,CHRM2,CHRM3,CHRM4,CHRM5,CYP2D6,CYP2C9,CYP1A2,CYP2B6,CYP2A6,CYP1A1	0	0	0	0	0
DB00570	approved	small molecule	vinblastine	L01CA01	TUBA1A,TUBB,TUBD1,TUBG1,TUBE1,JUN,CYP3A4,CYP2D6,ABCB1,ABCC1,ABCC2,ABCC6,ABCB11,SLC22A2	0	0	0	0	0
DB00571	approved, investigational	small molecule	propranolol	C07AA05	ADRB1,ADRB2,ADRB3,HTR1A,HTR1B,CYP3A5,CYP2D6,CYP3A7,CYP1A2,CYP2C19,CYP3A4,CYP1A1,ORM1,SLC22A2,ABCB1	1	0	0	0	0
DB00572	approved	small molecule	atropine	A03BA01,S01FA01	CHRM1,CHRM2,CHRM3,CHRM4,CHRM5,CYP1A2	0	1	0	0	0
DB00575	approved	small molecule	clonidine	C02AC01,N02CX02,S01EA04	ADRA2A,ADRA2B,ADRA2C,ADRA1A,ADRA1B,ADRA1D,CYP2D6,CYP1A2,CYP3A4,CYP1A1,CYP3A5,SLC22A1,SLC22A3,SLC22A5,SLC22A4,ABCB1	0	1	0	0	0
DB00577	approved, investigational	small molecule	valaciclovir	J05AB11	UL30,TK,SLC15A1,SLC15A2,SLC22A8,SLC22A6,SLC6A14,SLC10A2	0	0	0	0	0
DB00580	investigational, withdrawn	small molecule	valdecoxib	M01AH03	PTGS2,CYP3A4,CYP2C9,PTGS1,UGT1A9,CYP2C19	0	0	1	1	0
DB00582	approved, investigational	small molecule	voriconazole	J02AC03	ERG11,FMO1,FMO3,CYP3A5,CYP3A7,CYP2C19,CYP3A4,CYP2C9,PTGS1	1	0	0	0	0
DB00583	approved	small molecule	l-carnitine		SLC22A4,SLC22A5,CRAT,SLC25A29,SLC25A20,CROT,CPT2,CPT1A,XDH,CES1,MPO,SLC22A4,SLCO1B1,SLC22A5,SLC22A16,SLC22A8	0	0	0	0	0
DB00584	approved	small molecule	enalapril	C09AA02	ACE,CYP3A4,ABCB1,SLC15A1,SLC22A6,SLC22A8,SLC22A7,SLCO1A2	0	0	0	0	0
DB00586	approved	small molecule	diclofenac	D11AX18,M01AB05,M02AA15,S01BC03	PTGS2,PTGS1,ALOX5,SCN4A,ACCN2,KCNQ2,KCNQ3,PLA2G2A,CYP2C9,CYP2C19,CYP1A2,CYP2C8,UGT1A1,UGT2B7,PTGS1,CYP3A4,CYP1A1,CYP2B6,CYP2C18,CYP2E1,TTR,ALB,ABCC4,ABCB1,ABCC1,SLC22A6,SLC22A8,SLCO1C1,SLC22A11	0	1	0	1	0
DB00588	approved	small molecule	fluticasone propionate	D07AC17,R01AD08,R03BA05	NR3C1,PGR,PLA2G4A,NR3C2,CYP3A4,CYP3A5,CYP3A7,SERPINA6	0	0	0	0	0
DB00589	approved	small molecule	lisuride	G02CB02,N02CA07	DRD2,DRD3,DRD4,DRD1,DRD5,HTR1A,HTR1D,HTR2B,HTR2A,HTR2C,HTR1B,ADRA2A,ADRA2B,ADRA2C,CYP2D6,CYP3A4	0	0	0	0	1
DB00590	approved	small molecule	doxazosin	C02CA04	ADRA1A,ADRA1B,ADRA1D,KCNH2,KCNH6,KCNH7,CYP2C19,CYP2D6,ORM1,ABCB1	0	1	0	0	0
DB00593	approved	small molecule	ethosuximide	N03AD01	CACNA1G,CYP2E1,CYP3A4,CYP3A43,CYP3A5,CYP3A7	0	0	0	0	0
DB00594	approved	small molecule	amiloride	C03DB01	SCNN1A,SCNN1B,SCNN1G,SCNN1D,ABP1,ACCN1,ACCN2,SLC9A1,PLAU,ABP1,ABP1,SLC22A2,SLC22A1,SLC22A4	0	0	0	0	0
DB00595	approved	small molecule	oxytetracycline	D06AA03,G01AA07,J01AA06,S01AA04	rpsI,rpsD,SLC22A6,SLC22A8,SLC22A11,SLC22A7	0	0	0	0	0
DB00598	approved	small molecule	labetalol	C07AG01	ADRB1,ADRB2,ADRA1A,ADRA1B,ADRA1D,CYP2D6	0	0	0	1	0
DB00599	approved	small molecule	thiopental	N01AF03,N05CA19	GABRA1,GABRA2,GABRA3,GABRA4,GABRA5,GABRA6,CHRNA4,CHRNA7,GRIA2,GRIK2,FAAH,CYP2E1,CYP3A4	0	0	0	0	0
DB00602	approved	small molecule	ivermectin	D11AX22,P02CF01	GLRA3,GABRB3,CYP3A4,ABCB1,ABCC1,ABCC2,ABCG2	0	0	0	0	0
DB00603	approved, investigational	small molecule	medroxyprogesterone acetate		PGR,ESR1,CYP3A4,CYP2C8,HSD3B2,CYP2C9	0	0	0	1	0
DB00604	approved, investigational, withdrawn	small molecule	cisapride	A03FA02	HTR4,HTR3A,HTR2A,KCNH2,CYP3A7,CYP3A4,CYP3A5,CYP1A2,CYP2A6,CYP2B6,CYP2C19,CYP2C8,CYP2C9,CYP2D6	0	0	1	1	0
DB00605	approved	small molecule	sulindac	M01AB02	PTGS2,PTGS1,AKR1B1,MAPK3,PPARD,GPR44,CYP1A1,CYP1A2,ALB,SLC22A6	0	1	0	0	0
DB00606	approved	small molecule	cyclothiazide	C03AA09	FXYD2,CA1,CA2,CA4,SLC22A6	0	0	0	0	0
DB00607	approved	small molecule	nafcillin	J01CF06	pbp1b,penA,pbp2a,pbp3,pbpA,CYP3A4,CYP1A2,SLC22A6	0	0	0	0	0
DB00608	approved	small molecule	chloroquine	P01BA01	GSTA2,TNF,TLR9,GST,CYP3A4,CYP2D6,CYP1A1,CYP2C8,CYP3A5,ABCB1	1	0	0	1	0
DB00613	approved	small molecule	amodiaquine	P01BA06	HNMT,CYP2C8,CYP1A1,CYP1B1,CYP2D6,CYP2C9	0	0	0	0	0
DB00615	approved	small molecule	rifabutin	J04AB04	rpoA,rpoB,rpoC,HSP90AA1,HSP90B1,CYP3A4,CYP1A2	0	0	0	0	0
DB00617	approved	small molecule	paramethadione	N03AC01	CACNA1I,CYP2E1,CYP3A4,CYP2C9,CYP2C8	0	0	0	0	0
DB00619	approved	small molecule	imatinib	L01XE01	BCR/ABL fusion,KIT,RET,NTRK1,CSF1R,PDGFRA,DDR1,ABL1,PDGFRB,CYP3A4,CYP3A5,CYP3A7,CYP1A2,CYP2C9,CYP2D6,CYP2C19,PTGS1,ALB,ORM1,SLC22A1,ABCB1,SLC22A2,ABCG2,ABCA3	1	0	0	0	1
DB00620	approved	small molecule	triamcinolone	A01AC01,C05AA12,D07AB09,D07XB02,H02AB08,R01AD11,R03BA06,S01BA05	NR3C1,CYP3A4,PTGS2,BCHE,SERPINA6	0	0	0	0	0
DB00622	approved	small molecule	nicardipine	C08CA04	CACNA1C,CACNB2,CACNA1D,CACNA2D1,PDE1A,PDE1B,ADRA1A,ADRA1B,ADRA1D,CHRM1,CHRM2,CHRM3,CHRM4,CHRM5,CALM1,CYP3A4,CYP2D6,CYP2C9,CYP2C19,CYP2C8,CYP2B6,CYP2E1,CYP3A5,ABCB1	0	0	0	0	0
DB00623	approved	small molecule	fluphenazine	N05AB02	DRD2,DRD1,CALM1,CYP2D6,CYP1A2,CYP2E1,ABCB1	0	1	0	0	0
DB00624	approved, investigational	small molecule	testosterone	G03BA03	AR,CYP3A5,CYP19A1,CYP11A1,MAOA,CYP3A7,CYP3A4,CYP1A1,CYP1B1,CYP2A13,CYP2B6,CYP2C19,CYP2C8,CYP2C9,CYP3A43,ALB,SHBG,SLCO1A2,SLC22A8,SLC22A7,SLC22A1,ABCB1,SLC10A1,SLC22A3,SLC22A4,ABCG2	0	1	0	0	1
DB00625	approved, investigational	small molecule	efavirenz	J05AG03	pol,CYP2C19,CYP2C9,CYP2B6,CYP3A4,CYP1A2,CYP2D6	0	0	0	0	0
DB00627	approved, investigational, nutraceutical	small molecule	niacin	C04AC01,C10AD02	GPR109B,GPR109A,QPRT,NNMT,CYP2D6,SLC22A5,SLCO2B1,SLC16A1,SLC5A8,SLC16A3	0	0	0	0	0
DB00628	approved, illicit	small molecule	clorazepate		GABRA1,GABRA2,GABRA3,GABRA4,GABRA5,GABRA6,GABRB1,GABRB2,GABRB3,GABRD,GABRE,GABRG1,GABRG2,GABRG3,GABRP,GABRQ,TSPO,CYP3A4	0	1	0	0	0
DB00630	approved	small molecule	alendronate	M05BA04	FDPS,PTPN4,PTPRS,PTPRE,ATP6V1A	0	0	0	0	0
DB00633	approved	small molecule	dexmedetomidine	N05CM18	ADRA2A,CYP2E1,CYP1A2,CYP1A1,CYP2D6	0	0	0	0	0
DB00635	approved	small molecule	prednisone	A07EA03,H02AB07	NR3C1,HSD11B1,CYP3A4,CYP2C19,ALB,ABCB1,SLCO1A2	0	0	0	0	0
DB00636	approved	small molecule	clofibrate	C10AB01	PPARA,CYP2E1,GSTA2,CYP3A4,CYP1A1,CYP2A6,CYP2B6,CYP4A11	0	0	0	1	0
DB00637	approved, withdrawn	small molecule	astemizole	R06AX11	HRH1,KCNH2,CYP3A4,CYP3A5,CYP3A7,CYP2D6,CYP2J2,ABCB1	0	0	1	1	0
DB00640	approved, investigational	small molecule	adenosine	C01EB10	ADORA2A,ADORA2B,ADORA3,ADORA1,ADA,ADK,SLC28A3	0	0	0	0	0
DB00641	approved	small molecule	simvastatin	C10AA01	HMGCR,ITGB2,CYP3A4,CYP3A5,CYP3A7,CYP2C8,CYP2C9,CYP2C19,CYP2D6,CYP2B6,UGT1A1,UGT1A3,UGT2B7,ABCB1,SLCO1A2,SLCO1B1,ABCC2	0	0	0	0	0
DB00642	approved, investigational	small molecule	pemetrexed	L01BA04	TYMS,ATIC,DHFR,GART,DCK,SLC29A1	0	0	0	0	0
DB00643	approved	small molecule	mebendazole	P02CA01	TUBA1A,TUBB2C,CYP3A4,CYP1A1,ABCB1	0	0	0	0	0
DB00647	approved, illicit, withdrawn	small molecule	dextropropoxyphene	N02AC04	OPRM1,OPRD1,OPRK1,CYP3A4,CYP2D6,CYP2C8,CYP2C9,CYP3A7	0	0	1	0	0
DB00651	approved	small molecule	dyphylline	R03DA01	PDE4B,PDE4A,PDE4C,PDE4D,ADORA1,ADORA2A,PDE7A,PDE7B	0	0	0	0	0
DB00653	approved	small molecule	magnesium sulfate	A06AD04,A12CC02,B05XA05,D11AX05,V04CC02	CACNG1,CACNA2D1,CACNA1C,CACNB1,CACNB2,CACNA1S	0	0	0	0	0
DB00655	approved	small molecule	estrone	G03CA07,G03CC04	ESR1,CYP1A1,CYP1A2,CYP3A4,CYP1B1,CYP2B6,CYP2C9,CYP2E1,CYP3A5,CYP4A11,ALB,SLCO2B1,ABCB1,SLCO1A2,ABCG2,SLCO1B1	0	0	0	0	0
DB00656	approved, investigational	small molecule	trazodone	N06AX05	HTR2A,HTR2C,SLC6A4,HTR1A,HRH1,ADRA1A,ADRA2A,CYP3A4,CYP3A5,CYP3A7,CYP2D6,ORM1,ABCB1	0	0	0	1	0
DB00659	approved, investigational	small molecule	acamprosate	N07BB03	GABRA1,GABRA2,GABRA3,GABRA4,GABRA5,GABRA6,GABRB1,GABRB2,GABRB3,GABRD,GABRE,GABRG1,GABRG2,GABRG3,GABRP,GABRQ,GRIN1,GRIN2A,GRIN2B,GRIN2C,GRIN2D,GRIN3A,GRIN3B,GRM5,SLC36A1	0	0	0	0	0
DB00661	approved	small molecule	verapamil	C08DA01	CACNA1C,CACNA1D,CACNA1F,CACNA1S,CACNB1,CACNB2,CACNB3,CACNB4,CACNA1I,CACNA1G,CACNA1B,CACNA1A,KCNH2,SCN5A,KCNJ11,SLC6A4,CYP3A4,CYP3A5,CYP3A7,CYP1A2,CYP2C9,CYP2C8,CYP2C19,CYP2C18,CYP2B6,CYP2D6,ABCB1,SLC22A1,ABCC3,ABCC4,SLC22A5,ABCB11,ABCC1,SLCO1A2,ABCC10,ABCC2,SLC22A4,ABCG2,SLCO1B1	0	0	0	0	0
DB00665	approved	small molecule	nilutamide	L02BB02	AR,POR,CYP2C19,CYP2C8,CYP2C9	0	0	0	0	0
DB00667	approved	small molecule	histamine phosphate	V04CG03	HRH1,HRH2,HRH3,HRH4,HNMT,CYP2C9,CYP2D6,CYP3A4,SLC22A2,SLC22A1,SLC22A3,SLC22A5	0	0	0	0	0
DB00668	approved	small molecule	epinephrine	S01EA01,A01AD01,B02BC09,C01CA24,R01AA14,R03AA01	ADRA1A,ADRA1B,ADRB1,ADRB2,ADRA2A,ADRA2B,ADRA1D,PAH,ADRA2C,ADRB3,TNF,CYP1A2,CYP2C9,CYP3A4,SLC22A2,SLC22A1,SLC22A5	0	0	0	1	0
DB00669	approved, investigational	small molecule	sumatriptan	N02CC01	HTR1D,HTR1B,HTR1F,HTR1A,MAOA,SLCO1A2,ABCB1,ABCG2,SLCO1B1	0	0	0	0	0
DB00672	approved	small molecule	chlorpropamide	A10BB02	ABCC8,CYP2C9,CYP2C19,PTGS1,ABCB1,SLC15A1,SLC15A2,SLC22A6	1	0	0	0	0
DB00673	approved, investigational	small molecule	aprepitant	A04AD12	TACR1,CYP3A4,CYP3A5,CYP3A7,CYP1A2,CYP2C19,CYP2C9	0	0	0	0	0
DB00674	approved	small molecule	galantamine	N06DA04	ACHE,CHRNA1,CHRNB1,CHRND,CHRNG,CHRNE,CHRNA2,CHRNA3,CHRNA4,CHRNA5,CHRNA6,CHRNA7,CHRNA9,CHRNA10,CHRNB2,CHRNB3,CHRNB4,BCHE,CYP3A4,CYP2D6	1	0	0	0	0
DB00675	approved	small molecule	tamoxifen	L02BA01	ESR1,ESR2,EBP,PRKCA,PRKCB,PRKCD,PRKCE,PRKCG,PRKCI,PRKCQ,PRKCZ,CYP2D6,CYP3A4,CYP3A5,CYP3A7,CYP2C9,CYP2C19,CYP2B6,CYP1A1,CYP1A2,CYP1B1,FMO1,FMO3,CYP2C8,CES1,CYP19A1,CYP2A6,CYP2E1,UGT1A4,SULT1A1,ABCB1,ABCG2,ABCB11,ABCC2	1	0	0	0	0
DB00678	approved	small molecule	losartan	C09CA01	AGTR1,CYP2C9,CYP3A4,CYP3A5,CYP2C8,CYP2C19,CYP1A2,UGT1A1,UGT1A3,UGT1A10,UGT2B7,UGT2B17,ALB,ABCB1,SLC22A6,SLC22A12,SLC2A9	0	0	0	0	0
DB00679	approved	small molecule	thioridazine	N05AC02	DRD2,DRD1,ADRA1A,ADRA1B,HTR2A,KCNH2,CYP2D6,CYP2C19,CYP1A2,CYP2C8,CYP2C9,CYP2E1	1	1	0	1	0
DB00682	approved	small molecule	warfarin	B01AA03	VKORC1,CYP2C9,CYP1A2,CYP2C19,CYP3A4,CYP2C8,CYP2C18,CYP1A1,ALB,ORM1	1	0	0	1	0
DB00683	approved, illicit	small molecule	midazolam	N05CD08	GABRA1,GABRA2,GABRA3,GABRA4,GABRA5,GABRB1,GABRB3,GABRB2,GABRA6,GABRG1,GABRG2,GABRG3,GABRD,GABRE,GABRP,GABRR1,GABRR2,GABRR3,GABRQ,CYP3A4,CYP3A5,CYP3A7,CYP2B6,CYP4B1,UGT1A4,CYP2E1,ABCB1,SLC22A1	0	0	0	0	0
DB00688	approved, investigational	small molecule	mycophenolate mofetil		IMPDH1,IMPDH2,UGT1A1,UGT1A7,UGT1A6,UGT1A9,UGT2B7,UGT1A8,UGT1A10,CES1,CES2,CYP3A4,CYP3A5,CYP2C8,ALB,SLCO1B1,SLCO1B3,ABCC2,ABCG2,ABCB1	0	0	0	0	0
DB00690	approved, illicit	small molecule	flurazepam	N05CD01	GABRA1,GABRA2,GABRA3,GABRA4,GABRA5,GABRA6,GABRB1,GABRB2,GABRB3,GABRG1,GABRG2,GABRG3,GABRD,GABRE,GABRP,GABRR1,GABRR2,GABRR3,GABRQ,CYP2E1,CYP2A6,CYP3A4,ABCB1,SLC22A2	0	1	0	0	0
DB00694	approved	small molecule	daunorubicin	L01DB02	TOP2A,TOP2B,CYP3A4,CYP3A5,CYP1A2,CYP1A1,CYP1B1,XDH,POR,ABCB1,ABCC1,ABCC2,SLC22A2,ABCC6,ABCB11,ABCC10,ABCG2	0	0	0	0	0
DB00695	approved	small molecule	furosemide	C03CA01	SLC12A1,CA2,PGD,ALB,SLC22A6,SLC22A5,SLC22A8,ABCC2,SLCO2A1,SLC22A11	0	0	0	0	0
DB00696	approved	small molecule	ergotamine	N02CA02	HTR1D,HTR1B,HTR2A,DRD2,ADRA1A,ADRA1B,ADRA1D,ADRA2A,ADRA2B,SLC6A2,DRD1,DRD5,HTR1A,HTR1F,HTR2C,CYP3A4,CYP1A2,ABCB1	0	0	0	0	0
DB00697	approved	small molecule	tizanidine	M03BX02	ADRA2A,ADRA2B,ADRA2C,NISCH,CYP1A2	0	0	0	0	0
DB00698	approved	small molecule	nitrofurantoin	J01XE01	ydbK,nfsA,rpsJ,POR,ABCG2	1	1	0	0	0
DB00700	approved	small molecule	eplerenone	C03DA04	NR3C2,CYP3A4,CYP3A5,CYP3A7,CYP11B2	0	0	0	0	0
DB00701	approved	small molecule	amprenavir	J05AE05	pol,CYP3A4,CYP2B6,CYP2C19,CYP2C8,CYP2C9,CYP2D6,CYP3A5,ABCB1,ABCC1	0	0	0	0	0
DB00703	approved	small molecule	methazolamide	S01EC05	CA1,CA2,CA4,CA7,CYP2C19,CYP2C9,CYP2D6,CYP2E1,CYP3A4,SLC22A6	0	0	0	0	0
DB00704	approved, investigational	small molecule	naltrexone	N07BB04	OPRD1,OPRM1,OPRK1,OPRS1,UGT1A1,ABCB1	0	0	0	0	0
DB00705	approved	small molecule	delavirdine	J05AG02	pol,CYP3A4,CYP2D6,CYP3A5,CYP3A7,CYP2C9,CYP2C19,CYP1A2,CYP2C8	0	0	0	0	0
DB00706	approved, investigational	small molecule	tamsulosin	G04CA02	ADRA1A,ADRA1D,ADRA1B,CYP3A4,CYP2D6,ORM1	0	0	0	0	0
DB00709	approved, investigational	small molecule	lamivudine	J05AF05	pol,P,DCK,CMPK1,PGK1,NME1,NME2,PCYT1A,PCYT2,NT5C,ABCC1,SLC22A6,ABCG2,SLC22A1,SLC22A2,SLC22A3,ABCB1,ABCC4,ABCC3,ABCC2	0	0	0	0	0
DB00712	approved, investigational	small molecule	flurbiprofen	M01AE09,M02AA19,R02AX01,S01BC04	PTGS1,PTGS2,CYP2C9,UGT2B7,UGT1A1,UGT1A3,UGT1A9,UGT2B4,ALB,ABCC4,SLC22A6	1	0	0	0	0
DB00713	approved	small molecule	oxacillin	J01CF04	pbp3,pbp2a,pbpA,penA,pbp1b,pbpA,SLC15A1,SLC15A2,SLC15A1,SLC15A2	0	0	0	0	0
DB00714	approved, investigational	small molecule	apomorphine	G04BE07,N04BC07	DRD3,DRD4,DRD2,ADRA2C,ADRA2B,HTR2C,DRD5,HTR1A,HTR2A,HTR2B,ADRA2A,DRD1,HTR1D,HTR1B,CALY	0	0	0	0	0
DB00715	approved, investigational	small molecule	paroxetine	N06AB05	SLC6A4,SLC6A2,HTR2A,CHRM1,CHRM2,CHRM3,CHRM4,CHRM5,CYP2D6,CYP2C9,CYP2B6,CYP2C8,ABCB1	1	1	0	0	0
DB00716	approved	small molecule	nedocromil	R01AC07,R03BC03,S01GX04	CYSLTR1,CYSLTR2,FPR1,PTGDR,HSP90AA1	0	0	0	0	0
DB00717	approved	small molecule	norethindrone	G03AC01,G03DC02	PGR,CYP3A4,CYP3A5,CYP3A7,CYP2C19,ALB,SHBG,ABCB1	0	0	0	0	0
DB00718	approved, investigational	small molecule	adefovir dipivoxil	J05AF08	P,AK2,AK4,NME1,NME2,SLC22A6,ABCC4,ABCC5,SLC22A3,SLC22A8	0	0	0	0	0
DB00721	approved, investigational	small molecule	procaine	C05AD05,N01BA02,S01HA05	SCN10A,GRIN3A,HTR3A,SLC6A3,CHRNA2,KCNMA1,KCNMB1,KCNMB2,KCNMB3,KCNMB4,KCNN4,KCNN1,KCNN2,KCNN3,MAOA,MAOB,BCHE	0	0	0	0	0
DB00725	approved	small molecule	homatropine methylbromide		CHRM2,CHRM1,CHRM4,CHRM5,CHRM3	0	0	0	0	0
DB00726	approved	small molecule	trimipramine	N06AA06	SLC6A4,SLC6A2,SLC6A3,HTR2A,HTR1A,ADRA1A,ADRA1B,DRD2,ADRA2B,HRH1,HTR2C,HTR3A,HTR1D,ADRA2A,DRD1,DRD5,ADRB1,ADRB2,ADRB3,CHRM1,CHRM2,CHRM3,CHRM4,CHRM5,Htr2c,CYP3A4,CYP2D6,CYP2C19,CYP2C9,ABCB1	1	1	0	0	0
DB00728	approved	small molecule	rocuronium		CHRNA2,CHRM2,HTR3A,SLC22A1,SLCO1A2	0	0	0	0	0
DB00731	approved, investigational	small molecule	nateglinide	A10BX03	ABCC8,PPARG,CYP2C9,CYP3A4,CYP3A5,CYP3A7,PTGS1,UGT1A9,CYP2D6,ALB,ORM1,ABCC4,SLC16A1,SLC15A1,SLC15A2,SLC22A6	0	0	0	0	0
DB00734	approved, investigational	small molecule	risperidone	N05AX08	HTR2A,DRD2,DRD3,DRD4,ADRA1A,ADRA1B,HTR1D,HRH1,ADRA2A,ADRA2B,ADRA2C,HTR2C,HTR1A,DRD1,CYP2D6,CYP3A4,CYP3A5,CYP3A7,ABCB1	1	0	0	0	0
DB00738	approved	small molecule	pentamidine		TRDMT1,CYP2C19,CYP1A1,CYP2D6,CYP3A5,CYP4A11,CYP1A2,CYP2C8,CYP3A4	0	0	0	0	0
DB00740	approved, investigational	small molecule	riluzole	N07XX02	SCN5A,SLC7A11,CYP1A2,CYP1A1,ABCG2	0	0	0	0	0
DB00741	approved	small molecule	hydrocortisone	A01AC03,A07EA02,C05AA01,D07AA02,D07XA01,H02AB09,S01BA02,S01CB03,S02BA01	NR3C1,ANXA1,CYP3A4,CYP3A5,CYP3A7,CYP11B1,CYP11B2,CYP2C8,SHBG,ABCB1,ABCG2,SLCO1A2	0	0	0	0	0
DB00744	approved, investigational, withdrawn	small molecule	zileuton		ALOX5,CYP2C9,CYP1A2,CYP3A4,PTGS1,UGT1A9	0	0	1	0	0
DB00745	approved, investigational	small molecule	modafinil	N06BA07	SLC6A3,ADRA1B,CYP2C19,CYP3A4,CYP1A2,CYP2B6,CYP2C9,CYP3A5	1	0	0	0	0
DB00747	approved	small molecule	scopolamine	A04AD01,N05CM05,S01FA02	CHRM1,SI,CHRM2,CHRM3,CHRM4,CHRM5,ABCB1	0	1	0	0	0
DB00748	approved	small molecule	carbinoxamine	R06AA08	HRH1,CYP2B6,CYP2C19,CYP2C8,CYP2C9,CYP2D6,CYP2E1,CYP3A4	0	1	0	0	0
DB00749	approved, investigational	small molecule	etodolac	M01AB08	PTGS2,PTGS1,RXRA,CYP2C9,UGT1A9,UGT1A3,UGT1A10,UGT2B7,ALB,SLC22A6	0	1	0	0	0
DB00751	approved, investigational	small molecule	epinastine	R06AX24,S01GX10	HRH1,HRH2,ADRA1A,ADRA2A,HTR2A,HTR7,CYP2B6,CYP2D6,CYP3A4,ABCB1	0	0	0	0	0
DB00752	approved	small molecule	tranylcypromine	N06AF04	MAOA,MAOB,CYP3A4,CYP2D6,CYP2C9,CYP2C19,CYP1A2,CYP2E1,CYP2A6	0	0	0	1	0
DB00753	approved	small molecule	isoflurane	N01AB06	GABRA1,ATP2C1,GLRA1,GRIA1,KCNA1,ATP5D,CALM1,GABRA1,GABRA2,GABRA3,GABRA4,GABRA5,GABRA6,GABRB1,GABRB2,GABRB3,GABRD,GABRE,GABRG1,GABRG2,GABRG3,GABRP,GABRQ,CYP2E1,CYP2B6,MT-ND1,ALB	0	0	0	0	0
DB00755	approved, investigational, nutraceutical	small molecule	tretinoin	D10AD01,L01XX14	RXRB,RXRG,RARG,ALDH1A1,GPRC5A,NR0B1,ALDH1A2,RARRES1,CYP3A7,CYP2B6,CYP2C8,CYP2C9,CYP3A4,CYP3A5,CYP2A6,CYP2C18,CYP1A1,CYP4A11,CRABP1,CRABP2	1	0	0	0	0
DB00758	approved, nutraceutical	small molecule	clopidogrel	B01AC04	P2RY12,CYP3A4,CYP2B6,CYP3A5,CYP2C19,CYP2C9,CYP1A2,CYP2C8,CES1,ABCB1	1	0	0	0	1
DB00759	approved	small molecule	tetracycline	A01AB13,D06AA04,J01AA07,S01AA09,S02AA08,S03AA02	rpsG,rpsN,rpsC,rpsH,rpsS,PRNP,PADI4,CYP3A4,ALB,SLC22A6,SLC22A8,SLC22A11,SLC22A7	0	0	0	1	0
DB00761	approved, withdrawn	small molecule	potassium chloride	A12BA01,B05XA01	SLC12A2,SLC12A1,SLC12A5,SLC12A6,SLC12A7,SLC12A4,SLC12A2,SLC12A1,SLC12A5,SLC12A6,SLC12A7,SLC12A4	1	0	1	1	0
DB00762	approved, investigational	small molecule	irinotecan	L01XX19	TOP1,TOP1MT,CYP3A4,CYP3A5,CYP2B6,CYP3A7,UGT1A1,UGT1A9,CES1,CES2,BCHE,ALB,SLC22A3,SLCO1B1,ABCC1,ABCG2,ABCB1,ABCC2	1	0	0	0	0
DB00763	approved	small molecule	methimazole	H03BB02	TPO,CYP1A2,CYP2A6,CYP2B6,CYP2C19,CYP2C9,CYP2D6,CYP2E1,CYP3A4	0	0	0	0	0
DB00767	withdrawn	small molecule	benzquinamide		HRH1,CHRM4,CHRM1,CHRM5,CHRM2,CHRM3	0	0	1	0	0
DB00768	approved	small molecule	olopatadine	R01AC08,S01GX09	HRH1,S100A1,S100A12,S100B,S100A13,S100A2,CYP3A4	0	0	0	0	1
DB00770	approved, investigational	small molecule	alprostadil	C01EA01,G04BE01	PTGER2,PTGER1,ABCC5,SLCO2B1,SLCO3A1,ABCC4,SLCO2A1	0	0	0	0	0
DB00773	approved	small molecule	etoposide	L01CB01	TOP2A,TOP2B,CYP3A4,CYP1A2,CYP2C8,CYP2E1,CYP3A5,UGT1A1,GSTT1,GSTP1,PTGS2,PTGS1,ABCC3,ABCC6,ABCB1,ABCC1,ABCC10,ABCC2,ABCG2	0	0	0	0	0
DB00774	approved	small molecule	hydroflumethiazide	C03AA02	SLC12A1,CA1,CA2,CA4,CA9,CA12,ATP1A1,KCNMA1	0	0	0	0	0
DB00776	approved	small molecule	oxcarbazepine	N03AF02	SCN5A,CYP2C19,CYP3A4,CYP3A5,ALB	0	0	0	0	0
DB00777	approved	small molecule	propiomazine	N05CM06	HRH1,HTR2A,HTR2C,DRD2,DRD1,DRD4,ADRA1A,ADRA1B,ADRA1D,CHRM3,CHRM5,CHRM2,CHRM4,CHRM1	0	0	0	0	0
DB00778	approved, withdrawn	small molecule	roxithromycin	J01FA06	rplJ,ABCB1,CYP3A4,CYP1A2,CYP2B6	0	0	1	0	0
DB00780	approved	small molecule	phenelzine	N06AF03	MAOA,MAOB,AOC3,ABAT,GPT,GPT2,GAD65,MAOA,CYP2E1,MAOB,CYP2C19,CYP2C8,CYP3A4,CYP3A43,CYP3A5,CYP3A7	0	0	0	0	0
DB00783	approved, investigational	small molecule	estradiol	G03CA03	ESR1,ESR2,NR1I2,CYP3A4,CYP1A2,CYP3A5,CYP3A7,UGT1A1,CYP1A1,CYP1B1,CYP2C19,CYP2C8,CYP2C9,SHBG,ALB,FABP2,SLC22A2,SLC22A1,SLC22A3,SLCO2B1,SLCO1A2,ABCC10,SLC22A11,ABCG2,SLCO1B1,ABCB1,SLC22A8,SLCO1B3,SLCO1C1,SLCO4A1	0	0	0	0	0
DB00785	approved	small molecule	cryptenamine		CHRM2,CHRM1,CHRM3,CHRM4,CHRM5	0	0	0	0	0
DB00786	approved, investigational	small molecule	marimastat		MMP1,MMP2,MMP3,MMP7,MMP8,MMP10,MMP11,MMP12,MMP13,MMP14,MMP15,MMP16,MMP17,MMP19,MMP20,MMP21,MMP23A,MMP24,MMP25,MMP26,MMP27,MMP28	0	0	0	0	0
DB00787	approved	small molecule	aciclovir	D06BB03,J05AB01,S01AD03	TK,UL30,ORF28,SLC22A1,SLC22A6,SLC22A8,SLC10A2,SLC47A1,SLC47A2	0	0	0	0	0
DB00788	approved	small molecule	naproxen	G02CC02,M01AE02,M02AA12	PTGS2,PTGS1,CYP2C9,CYP1A2,CYP2C8,UGT1A1,UGT2B7,ALB,SLCO1A2,SLC22A6	0	1	0	0	0
DB00790	approved	small molecule	perindopril	C09AA04	ACE,BCHE,ABCB1,SLC15A1,SLC15A2	0	0	0	0	0
DB00794	approved	small molecule	primidone	N03AA03	GABRA1,GABRA2,GABRA3,GABRA4,GABRA5,GABRA6,CHRNA4,CHRNA7,GRIA2,GRIK2,GABRA1,GABRA2,GABRA3,GABRA4,GABRA5,GABRA6,GABRB1,GABRB2,GABRB3,GABRD,GABRE,GABRG1,GABRG2,GABRG3,GABRP,GABRQ,CYP2C19,CYP2C9,CYP3A4,CYP1A2,CYP2B6,CYP2C8	0	0	0	0	0
DB00795	approved	small molecule	sulfasalazine	A07EC01	ALOX5,PTGS2,PTGS1,PPARG,CHUK,IKBKB,SLC7A11,ACAT1,TBXAS1,PLA2G1B,CYP3A5,ABCG2,ABCC2,SLC46A1	0	0	0	0	0
DB00796	approved	small molecule	candesartan	C09CA06	AGTR1,CYP2C9,CYP2C8,UGT1A3,PTGS1,ABCB1	0	0	0	0	0
DB00797	approved	small molecule	tolazoline	C04AB02,M02AX02	ADRA1A,ADRA2A,HRH1,HRH2,ADRA2C,ADRA2B	0	0	0	0	0
DB00798	approved	small molecule	gentamicin	D06AX07,J01GB03,S01AA11,S02AA14,S03AA06	rpsL,LRP2,nadE,DHFR,SLC22A6	0	0	0	0	0
DB00799	approved, investigational	small molecule	tazarotene	D05AX05	RARA,RXRB,RARG,RARB,CYP2C8	0	0	0	0	0
DB00800	approved	small molecule	fenoldopam	C01CA19	DRD5,DRD1,ADRA2B,ADRA2C,ADRA2A,ADRA1B,ADRA1D,ADRA1A	0	0	0	0	0
DB00801	approved, illicit, withdrawn	small molecule	halazepam	N05BA13	GABRA1,GABRA2,GABRA3,GABRA5,GABRG1,GABRG2,GABRG3,GABRB1,GABRB2,GABRB3,GABRD,GABRE,GABRP,GABRR1,GABRR2,GABRR3,GABRA1,GABRA2,GABRA3,GABRA4,GABRA5,GABRA6,GABRB1,GABRB2,GABRB3,GABRD,GABRE,GABRG1,GABRG2,GABRG3,GABRP,GABRQ	0	0	1	0	0
DB00802	approved, illicit	small molecule	alfentanil	N01AH02	OPRM1,CYP3A4,CYP3A7,CYP3A5,ORM1,ALB,ABCB1	0	0	0	0	0
DB00805	approved	small molecule	minaprine	N06AX07	MAOA,HTR2B,HTR2A,HTR2C,ACHE,SLC6A4,DRD1,DRD2,CHRM1,CYP2D6	0	0	0	0	0
DB00806	approved, investigational	small molecule	pentoxifylline	C04AD03	PDE4B,ADORA1,PDE5A,PDE4A,ADORA2A,NT5E,CYP1A2	0	0	0	0	0
DB00811	approved	small molecule	ribavirin	J05AB04	IMPDH1,ADK,L,PB1,NT5C2,ENPP1,ADK,SLC29A1,SLC28A3	0	0	0	0	0
DB00812	approved	small molecule	phenylbutazone	M01AA01,M02AA01	PTGS2,PTGIS,PTGS1,CYP2C9,CYP3A4,SLC22A6,SLC22A8,SLC22A11	0	0	0	1	0
DB00813	approved, illicit, investigational	small molecule	fentanyl	N01AH01,N02AB03	OPRM1,OPRD1,OPRK1,CYP3A4,CYP3A5,CYP3A7,ABCB1	0	0	0	0	1
DB00814	approved	small molecule	meloxicam	M01AC06	PTGS2,PTGS1,CYP2C9,CYP3A4,PGD,CYP2C8,ABCC4	0	1	0	0	0
DB00818	approved, investigational	small molecule	propofol	N01AX10	GABRB2,GABRB3,SCN4A,SCN2A,GABRA1,GABRA2,GABRA3,GABRA4,GABRA5,GABRA6,GABRB1,GABRB2,GABRB3,GABRD,GABRE,GABRG1,GABRG2,GABRG3,GABRP,GABRQ,CYP2C9,CYP2B6,UGT1A8,UGT1A9,UGT1A1,FAAH,CYP2E1,CYP1B1,CYP1A1,CYP1A2,CYP2A6,CYP2C18,CYP2C19,CYP2C8,CYP2D6,CYP3A4,UGT1A6,ALB	0	0	0	1	0
DB00819	approved	small molecule	acetazolamide	S01EC01	CA1,CA14,CA2,CA3,CA4,CA7,AQP1,CYP3A4,SLC22A6	0	0	0	0	0
DB00822	approved	small molecule	disulfiram	N07BB01,P03AA04	ALDH2,DBH,CYP2E1,CYP2C9,CYP3A4,CYP3A5	0	0	0	0	0
DB00824	approved	small molecule	enprofylline		PDE4A,PDE4B,ADORA2B,ADORA1,ADORA2A,ADORA3	0	0	0	0	0
DB00829	approved, illicit	small molecule	diazepam	N05BA01	GABRA1,GABRA2,GABRA3,GABRA5,GABRB1,GABRB2,GABRB3,GABRG1,GABRG2,GABRG3,GABRD,GABRE,GABRP,GABRR1,GABRR2,GABRR3,GABRQ,TSPO,GABRA1,GABRA2,GABRA3,GABRA4,GABRA5,GABRA6,GABRB1,GABRB2,GABRB3,GABRD,GABRE,GABRG1,GABRG2,GABRG3,GABRP,GABRQ,CYP3A4,CYP3A5,CYP3A7,CYP2C19,CYP2C9,CYP2B6,CYP1A2,CYP2C18,CYP2C8,PTGS1,CYP2E1,ALB,ABCB1	1	1	0	0	0
DB00831	approved	small molecule	trifluoperazine	N05AB06	DRD2,CALY,ADRA1A,CALM1,TNNC1,S100A4,XDH,UGT1A4,CYP1A2,ABCB1	0	1	0	0	0
DB00833	approved	small molecule	cefaclor	J01DC04	pbp3,pbpA,MPO,SLC15A1,SLC15A2	0	0	0	0	0
DB00834	approved, investigational	small molecule	mifepristone	G03XB01	PGR,NR3C1,CYP3A4,CYP3A5,CYP3A7,CYP2D6,ABCB1,ABCC1	0	0	0	0	1
DB00835	approved	small molecule	brompheniramine	R06AB01	HRH1,CHRM1,CHRM2,CHRM3,CHRM4,CHRM5,CYP2B6,CYP2C19,CYP2C8,CYP2C9,CYP2D6,CYP2E1,CYP3A4	0	1	0	0	0
DB00836	approved	small molecule	loperamide	A07DA03	OPRM1,OPRD1,OPRK1,CACNA1A,POMC,CALM1,CYP3A4,CYP2C8,CYP2B6,CYP2D6,ABCB1	0	0	0	1	0
DB00842	approved	small molecule	oxazepam	N05BA04	GABRA1,GABRA2,GABRA3,GABRA4,GABRA5,GABRA6,GABRB1,GABRB2,GABRB3,GABRG1,GABRG2,GABRG3,GABRD,GABRE,GABRP,GABRR1,GABRR2,GABRR3,GABRQ,GABRA1,GABRA2,GABRA3,GABRA4,GABRA5,GABRA6,GABRB1,GABRB2,GABRB3,GABRD,GABRE,GABRG1,GABRG2,GABRG3,GABRP,GABRQ,CYP3A4,CYP3A43,CYP3A5,CYP3A7,UGT2B15,UGT2B7,UGT1A9	0	1	0	0	0
DB00843	approved	small molecule	donepezil	N06DA02	ACHE,HTR2A,CYP2D6,CYP3A4,CYP2C9	0	0	0	0	0
DB00845	approved, investigational	small molecule	clofazimine	J04BA01	GK0582,ABCB1,ABCB11,CYP3A4,ABCB11,ABCB1	0	0	0	0	0
DB00848	withdrawn	small molecule	levamisole		CHRNA3,ALPPL2,unc-38,unc-63,lev-1,unc-29	0	0	1	1	0
DB00849	approved	small molecule	methylphenobarbital	N03AA01	GABRA1,GABRA2,GABRA3,GABRA4,GABRA5,GABRA6,CHRNA4,CHRNA7,GRIA2,GRIK2,CYP2C19,CYP2B6	0	0	0	0	0
DB00850	approved	small molecule	perphenazine	N05AB03	DRD2,DRD1,CALM1,CYP2D6,CYP1A2,CYP2B6,CYP2C18,CYP2C19,CYP2C8,CYP2C9,CYP3A4	1	1	0	0	0
DB00851	approved, investigational	small molecule	dacarbazine	L01AX04	POLA2,PGD,CYP1A1,CYP1A2,CYP2E1	0	0	0	0	0
DB00852	approved	small molecule	pseudoephedrine	R01BA02	SLC6A2,SLC6A3,ADRA1A,ADRA2A,SLC6A4,ADRB2,ADRB1,NFATC1,TNF,ATF1,ATF2,ATF3,ATF4,ATF5,ATF6,ATF7,JDP2,FOS,JUN,IL2,MAOA,CYP2D6	0	0	0	0	0
DB00856	approved, withdrawn	small molecule	chlorphenesin	D01AE07	CYP2B,CYP19A1,CYP3A4,XDH,PTGS2,BCHE	0	0	1	0	0
DB00857	approved, investigational	small molecule	terbinafine	D01AE15,D01BA02	SQLE,CYP2C9,CYP1A2,CYP3A4,CYP2C8,CYP2C19,CYP2D6,PTGS1,CYP11A1,CYP19A1	1	0	0	0	0
DB00860	approved	small molecule	prednisolone	A07EA01,C05AA04,D07AA03,D07XA02,H02AB06,R01AD02,S01BA04,S01CB02,S02BA03,S03BA02	NR3C1,CYP3A4,CYP2A6,SERPINA6,SLCO1A2,ABCB1	0	0	0	0	0
DB00861	approved	small molecule	diflunisal	N02BA11	PTGS2,PTGS1,UGT1A8,TTR,ALB,SLC22A6	0	1	0	0	0
DB00862	approved	small molecule	vardenafil	G04BE09	PDE5A,PDE6G,PDE6H,CYP3A4,CYP3A5	0	0	0	0	0
DB00863	approved	small molecule	ranitidine	A02BA02	HRH2,CYP1A2,CYP2C19,CYP2D6,CYP3A4,CYP3A5,SLC22A1,ABCB1,SLC22A8	0	0	0	0	0
DB00864	approved, investigational	small molecule	tacrolimus	D11AH01,L04AD02	FKBP1A,CYP3A7,CYP3A5,CYP3A4,ALB,ORM1,ABCB1,ABCA5	0	0	0	0	0
DB00865	approved, illicit	small molecule	benzphetamine		SLC18A2,ADRA2A,ADRA1A,SLC6A3,CYP3A4,CYP2B6,POR	0	0	0	0	0
DB00869	approved	small molecule	dorzolamide	S01EC03	CA2,CA4,CA1,CYP2C9,CYP3A4	0	0	0	0	0
DB00870	approved, withdrawn	small molecule	suprofen	M01AE07	PTGS1,PTGS2,CYP2C9,UGT1A1,UGT2B7	0	0	1	1	0
DB00875	approved, withdrawn	small molecule	flupentixol	N05AF01	DRD2,HTR2A,DRD1,ADRA1A,CHRM1,DDC,ABCB1	0	0	1	0	0
DB00877	approved, investigational	small molecule	sirolimus	L04AA10	MTOR,FKBP1A,FGF2,CYP3A4,CYP3A5,CYP3A7,ABCB1,SLCO1B1,SLC47A1	0	0	0	0	0
DB00880	approved	small molecule	chlorothiazide	C03AA04	SLC12A3,CA1,CA2,CA4,SLC22A6	0	0	0	0	0
DB00882	approved, investigational	small molecule	clomifene	G03GB02	ESR1,CYP11A1,CYP19A1,CYP1A1,CYP1A2,CYP2A6,CYP2E1,CYP3A4,ABCB1	0	0	0	0	0
DB00887	approved	small molecule	bumetanide	C03CA02	SLC12A1,SLC12A2,SLC12A4,SLC12A5,CFTR,PTGS2,SLC10A1,SLC22A6,SLC22A8,SLC22A11,SLC22A7,SLCO1A2	0	0	0	0	0
DB00889	approved, investigational	small molecule	granisetron	A04AA02	HTR3A,CYP3A4,CYP1A1,CYP2D6,CYP3A5	0	0	0	0	0
DB00893	approved	small molecule	iron dextran		HBB,HBA1,FTH1,FTL,TF	0	0	0	0	0
DB00897	approved	small molecule	triazolam	N05CD05	GABRA1,GABRA2,GABRA3,GABRA4,GABRA5,GABRA6,GABRB1,GABRB2,GABRB3,GABRG1,GABRG2,GABRG3,GABRD,GABRE,GABRP,GABRR1,GABRR2,GABRR3,GABRQ,TSPO,GABRA1,GABRA2,GABRA3,GABRA4,GABRA5,GABRA6,GABRB1,GABRB2,GABRB3,GABRD,GABRE,GABRG1,GABRG2,GABRG3,GABRP,GABRQ,CYP3A4,CYP3A5,CYP3A7,CYP2C8,CYP2C9	0	1	0	1	0
DB00898	approved	small molecule	ethanol	D08AX08,V03AB16,V03AZ01	GABRA1,GRIN3A,GLRA1,GLRA2,CACNB1,HTR3A,GABRA2,CHRNA10,CACNA1C,GABRA5,GABRA4,GABRA3,GRIA1,CACNG1,CHRNA2,GABRA6,GRIA2,GRIA4,GRIA3,CHRNA4,CHRNB2,KCNJ3,KCNJ6,VCAM1,SLC29A1,KCNJ5,CHRNA7,CHRNA9,GABRB1,GABRB3,GABRB2,CACNA1S,CACNA1D,CHRNB4,CHRNA3,CHRNA5,CHRNA6,CHRNB3,GABRG1,GABRG3,GABRE,GABRP,GABRQ,GABRD,SLC29A2,HTR3E,HTR3B,HTR3D,HTR3C,CACNG2,KCNJ9,CYP2E1,CYP1A1,CYP1A2,CYP2B6,CYP2C19,CYP2C9,CYP3A4,CYP4A1…	0	0	0	1	0
DB00900	approved	small molecule	didanosine	J05AF02	pol,PNP,SLC22A6,SLC29A1,SLC29A2	0	0	0	0	0
DB00903	approved	small molecule	ethacrynic acid	C03CC01	ATP1A1,SLC12A1,GSTA2,ALB,SLC22A6	0	0	0	0	0
DB00904	approved	small molecule	ondansetron	A04AA01	HTR3A,HTR4,OPRM1,HTR1A,HTR1B,CYP3A4,CYP1A2,CYP2D6,CYP3A5,CYP3A7,CYP2C9,CYP2E1	0	0	0	0	0
DB00907	approved, illicit	small molecule	cocaine	N01BC01,R02AD03,S01HA01,S02DA02	SLC6A3,SLC6A2,SLC6A4,SCN5A,SCN11A,SCN10A,CHRM1,CHRM2,CYP3A4,CYP3A5,CYP3A7,CYP2D6,CYP2C9,CYP2C8,SLC22A2	0	0	0	0	0
DB00908	approved	small molecule	quinidine	C01BA01	SCN5A,KCNK1,KCNK6,KCNH2,CYP3A4,CYP3A7,CYP2D6,CYP1A2,CYP2E1,CYP1A1,CYP2B6,CYP2C8,CYP2C9,ORM1,SLC22A2,SLC22A1,SLC22A5,ABCB11,ABCB1,SLCO1A2,SLC22A8,ABCC2,SLC22A4,SLCO1B1	1	0	0	0	0
DB00909	approved, investigational	small molecule	zonisamide	N03AX15	SCN1A,SCN2A,SCN3A,SCN4A,SCN5A,SCN9A,SCN11A,SCN1B,SCN2B,SCN3B,SCN4B,CACNA1G,CACNA1H,CACNA1I,CA1,CA2,CA3,CA4,CA5A,CA5B,CA6,CA7,CA8,CA9,CA10,CA11,CA12,CA13,CA14,MAOB,MAOA,CYP3A4,AOX1,CYP2C19	0	0	0	0	0
DB00912	approved, investigational	small molecule	repaglinide	A10BX02	ABCC8,PPARG,CYP3A4,CYP2C8,ALB,SLCO1B1	0	0	0	0	1
DB00914	approved, withdrawn	small molecule	phenformin	A10BA01	PRKAA1,KCNJ8,CYP2D6,SLC22A2,SLC22A1	0	0	1	1	0
DB00915	approved	small molecule	amantadine	N04BB01	M,GRIN3A,DRD2,DDC,MAOB,SLC22A2,SLC22A1,ABCB1	0	0	0	0	0
DB00916	approved	small molecule	metronidazole	A01AB17,D06BX01,G01AF01,J01XD01,P01AB01	rdxA,CYP51A1,CYP2C9,CYP3A4,CYP2C8	0	0	0	0	0
DB00917	approved	small molecule	dinoprostone	G02AD02	PTGER2,PTGER1,PTGER3,PTGER4,CYP11A1,CYP19A1,CYP1A2,SLC22A2,SLC22A1,ABCC5,SLC22A6,SLC22A8,SLC22A11,SLC22A7,ABCC4,SLCO2B1,SLCO1A2,OSTA,OSTB,SLCO2A1,SLCO4A1,SLCO1C1,SLCO3A1,SLCO1B1	0	0	0	1	0
DB00918	approved, investigational	small molecule	almotriptan	N02CC05	HTR1B,HTR1D,MAOA,CYP3A4,CYP2D6,FMO3,CYP1A2,CYP2C19,CYP2E1,CYP2C8	0	0	0	0	0
DB00920	approved	small molecule	ketotifen	R06AX17,S01GX08	HRH1,PDE4A,PDE4B,PDE4D,PDE4C,PDE7A,PDE7B,PDE8A,PDE8B,PGD	0	0	0	0	0
DB00921	approved, illicit, investigational	small molecule	buprenorphine	N02AE01,N07BC01	OPRM1,OPRK1,OPRD1,CYP3A4,CYP3A5,CYP2C9,CYP2C8,CYP3A7,UGT1A9,CYP2D6,CYP2C18,CYP2C19,CYP1A2,CYP2A6,ABCB1,ABCG2	0	0	0	1	0
DB00925	approved	small molecule	phenoxybenzamine	C04AX02	ADRA1A,ADRA2A,ADRA2C,ADRA2B,CALM1,ADRB2,ADRA1B,ADRA1D,CYP3A4,SLC22A2,SLC22A1,SLC22A3	0	0	0	0	0
DB00926	withdrawn	small molecule	etretinate		RARA,RXRA,RARB,RXRG,RXRB,RARG,CYP19A1,CYP26A1,CRABP1	0	0	1	1	0
DB00934	approved	small molecule	maprotiline	N06AA21	SLC6A2,HRH1,CHRM1,CHRM2,CHRM3,CHRM4,CHRM5,ADRA1A,ADRA1B,ADRA1D,HTR2A,HTR2C,HTR7,DRD2,ADRA2A,ADRA2B,ADRA2C,CYP2D6,CYP1A2,ORM1,ABCB1	0	0	0	0	0
DB00935	approved	small molecule	oxymetazoline	R01AA05,R01AB07,S01GA04	ADRA1A,ADRA2A,ADRA2C,ADRA2B,ADRA1B,ADRA1D	0	0	0	0	0
DB00936	approved	small molecule	salicylic acid	D01AE12,S01BC08	PTGS1,PTGS2,AKR1C1,CYP2C9,ALB,SLC22A6,SLC22A10,SLC22A8,SLC22A11,SLCO2B1,ABCB1,SLC16A1,SLC22A7	0	0	0	0	0
DB00938	approved	small molecule	salmeterol	R03AC12	ADRB2,CYP3A4,CYP3A5,CYP3A7,CYP2C8	0	0	0	0	0
DB00939	approved	small molecule	meclofenamic acid	M01AG04,M02AA18	PTGS1,PTGS2,ALOX5,KCNQ2,KCNQ3,SLC22A6,SLCO1C1	0	0	0	0	0
DB00943	approved	small molecule	zalcitabine	J05AF03	pol,DCK,CYP2C9,CYP2D6,CYP3A4,CYP3A43,CYP3A5,CYP3A7,SLC22A6,SLC22A7,SLC29A1,SLC29A2	0	0	0	0	0
DB00945	approved	small molecule	acetylsalicylic acid	A01AD05,B01AC06,N02BA01	PTGS1,PTGS2,AKR1C1,PRKAA1,PRKAA2,PRKAB1,PRKAB2,PRKAG1,PRKAG2,PRKAG3,EDNRA,IKBKB,TP53,HSPA5,RPS6KA3,NFKBIA,NFKB2,NFKB1,CYP2C19,CYP2C8,CYP2C9,ALB,SLC22A6,ABCB1,SLC22A7	0	0	0	0	0
DB00946	approved	small molecule	phenprocoumon	B01AA04	VKORC1,CYP2C8,CYP2C9,CYP3A4,ALB,ORM1	0	0	0	0	0
DB00949	approved	small molecule	felbamate	N03AX10	GRIN2B,GRIN3A,GRIN2A,CYP3A4,CYP2C19,CYP2E1	0	0	0	0	0
DB00950	approved	small molecule	fexofenadine	R06AX26	HRH1,CYP2D6,ABCB1,SLCO2B1,SLCO1A2,SLCO1B1,SLCO1B3	0	0	0	0	0
DB00951	approved	small molecule	isoniazid	J04AC01	katG,inhA,CYP2C8,CYP1A2,CYP3A4,CYP2C19,folA,CYP3A4,CYP2E1,CYP2C9,CYP1A2,CYP2D6,CYP2C19,NAT2,nat,CYP2A6,CYP2C8	1	0	0	0	0
DB00952	approved, investigational	small molecule	naratriptan	N02CC02	HTR1D,HTR1B,HTR1F,HTR1A,MAOA	0	0	0	0	0
DB00953	approved	small molecule	rizatriptan	N02CC04	HTR1D,HTR1B,HTR1F,MAOA,CYP1A2	0	0	0	0	0
DB00958	approved	small molecule	carboplatin	L01XA02	XDH,MPO,GSTT1,MT1A,MT2A,SOD1,GSTP1,GSTM1,NQO1,SLC31A1,SLC31A2,ATP7A,ATP7B,ABCG2,ABCC2	0	0	0	0	0
DB00960	approved	small molecule	pindolol	C07AA03	ADRB1,ADRB2,HTR1A,HTR1B,CYP2D6	0	0	0	0	0
DB00962	approved, illicit, investigational	small molecule	zaleplon	N05CF03	GABRA1,TSPO,CYP3A4,CYP3A5,CYP3A7,AOX1	0	1	0	0	0
DB00966	approved, investigational	small molecule	telmisartan	C09CA07	AGTR1,PPARG,CYP2C19,ABCB1,ABCC2,ABCG2	0	0	0	0	0
DB00967	approved, investigational	small molecule	desloratadine	R06AX27	HRH1,CYP2C19,CYP1A2,CYP2D6,CYP2C9,ABCB1	0	0	0	0	1
DB00969	approved, withdrawn	small molecule	alosetron	A03AE01	HTR3A,CYP2C9,CYP3A4,CYP1A2,CYP2E1	0	0	1	0	0
DB00970	approved	small molecule	dactinomycin	L01DA01	TOP2A,TOP2B,SLC22A5,ABCB1,ABCC6,ABCC1,ABCG2	0	0	0	0	0
DB00972	approved	small molecule	azelastine	R01AC03,R06AX19,S01GX07	HRH1,CYP1A2,CYP3A4,CYP2C19,CYP1A1,CYP3A5,CYP2C9,CYP2C8,CYP2D6,CYP2A6,CYP2B6,CYP2E1,ABCB1	0	0	0	0	0
DB00973	approved	small molecule	ezetimibe	C10AX09	SOAT1,NPC1L1,ANPEP,UGT1A1,UGT1A3,UGT2B15,UGT2B7,CYP3A4,ABCB1,ABCC2,SLCO1B1,ABCG5,ABCC3,ABCG2,ABCG8	0	0	0	0	0
DB00975	approved	small molecule	dipyridamole	B01AC07	PDE10A,ADA,PDE5A,PDE4A,ABCC4,ABCC5,ABCB1	0	1	0	0	0
DB00976	approved	small molecule	telithromycin	J01FA15	CYP3A7,CYP1A2,CYP3A4,CYP3A5,CYP2D6	0	0	0	0	0
DB00977	approved	small molecule	ethinyl estradiol	G03CA01,L02AA03	ESR1,NR1I2,CYP3A4,CYP2C8,ABCB11,SLC10A1,ABCC2,ABCB1	1	0	0	0	0
DB00978	approved	small molecule	lomefloxacin	J01MA07,S01AE04	parC,gyrA,TOP2A,CYP1A2,SLC22A5,ABCC2	0	0	0	0	0
DB00980	approved, investigational	small molecule	ramelteon	N05CH02	MTNR1A,MTNR1B,CYP1A2,CYP2C19,CYP3A4	0	0	0	0	1
DB00983	approved, investigational	small molecule	formoterol	R03AC13	ADRB2,CYP2D6,CYP2C19,CYP2C9,CYP2A6	0	0	0	0	0
DB00987	approved, investigational	small molecule	cytarabine	L01BC01	POLB,CDA,CYP3A4,DCK,NT5E,DCTD,SLC22A2,SLC22A1,ABCC10,SLC29A1	0	0	0	0	1
DB00988	approved	small molecule	dopamine	C01CA04	DRD2,DRD1,DRD5,DRD3,DRD4,SLC6A3,DBH,HTR1A,HTR7,DRD1,DRD5,SLC6A2,SLC6A4,MAOA,MAOB,COMT,DBH,CYP1A2,CYP2C19,CYP2C9,CYP2D6,SLC22A2,SLC22A1,SLC22A3,SLC22A5,POU5F1	0	0	0	0	0
DB00993	approved	small molecule	azathioprine	L04AX01	HPRT1,XDH,TPMT,GSTA1,GSTA2,GSTM1	1	0	0	0	0
DB00996	approved, investigational	small molecule	gabapentin	N03AX12	CACNA2D1,CACNA2D2,CACNA1B,ADORA1,GRIN1,GRIN2A,GRIN2B,GRIN2C,GRIN2D,GRIN3A,GRIN3B,BCAT1	0	0	0	0	0
DB00997	approved, investigational	small molecule	doxorubicin	L01DB01	TOP2A,CYP3A4,CYP2D6,CYP2B6,CYP1B1,CBR1,CBR3,AKR1A1,AKR1C3,NQO1,XDH,NOS1,NOS2,NOS3,NDUFS2,NDUFS3,NDUFS7,POR,ABCB1,ABCC1,ABCC3,ABCC6,ABCG2,SLC22A16,ABCC10,ABCB8,ABCB11,RALBP1,ABCC2	0	0	0	0	1
DB00999	approved	small molecule	hydrochlorothiazide	C03AA03	SLC12A3,CA1,CA2,CA4,CA9,CA12,KCNMA1,SLC22A6	0	0	0	0	0
DB01000	approved	small molecule	cyclacillin		pbpA,pbpA,pbp3,mecA,SLC22A5,SLC15A1,SLC15A2	0	0	0	0	0
DB01004	approved, investigational	small molecule	ganciclovir	J05AB06,S01AD09	UL30,TK,SLC22A1,SLC22A6,SLC22A8,SLC22A7	0	0	0	0	0
DB01007	approved	small molecule	tioconazole	D01AC07,G01AF08	ERG11,CYP51A1,CYP19A1,CYP1A2,CYP2C19,CYP2C8,CYP2C9,CYP2E1,CYP3A4	0	0	0	0	0
DB01008	approved, investigational	small molecule	busulfan	L01AB01	CYP3A4,GSTA2,GSTA1,GSTM1,GSTP1,MGST2	1	0	0	0	0
DB01009	approved	small molecule	ketoprofen	M01AE03,M02AA10	PTGS1,PTGS2,CXCR1,CYP2C9,CYP2C8,ALB,ABCC4,SLCO1A2,SLC22A6,SLC22A8,SLC22A11,SLC22A7	0	1	0	0	1
DB01011	approved	small molecule	metyrapone	V04CD01	CYP11B1,camC,CYP11B2,CYP2A6,CYP3A4,CYP11B1,CYP2E1,ABCC3	0	0	0	0	0
DB01014	approved, investigational	small molecule	balsalazide	A07EC04	PPARG,PTGS2,PTGS1,ALOX5,azr	0	0	0	0	0
DB01015	approved	small molecule	sulfamethoxazole	J01EC01	folP,folC,NAT1,NAT2,CYP2C9,PTGS1,UGT1A9,CYP2C8,CYP3A4,ALB	1	0	0	0	0
DB01016	approved	small molecule	glyburide	A10BB01	ABCC8,KCNJ1,KCNJ5,ABCC9,ABCB11,ABCA1,CFTR,KCNJ11,KCNJ11,KCNJ8,CPT1A,CYP2C9,CYP3A4,CYP2C19,ALB,ABCC3,ABCB11,ABCB1,ABCC1,SLC15A1,SLCO1A2,SLC15A2,SLC22A6,ABCC2,ABCG2,SLC22A7,SLCO2B1	1	1	0	0	0
DB01017	approved, investigational	small molecule	minocycline	A01AB23,J01AA08	rpsI,rpsD,IL1B,ALOX5,VEGFA,CASP1,CASP3,CYCS,SLC22A6,SLC22A8,SLC22A11,SLC22A7	0	0	0	1	0
DB01018	approved, investigational	small molecule	guanfacine	C02AC02	ADRA2A,ADRA2B,CYP3A4,CYP2C9,CYP2C19	0	1	0	0	0
DB01021	approved	small molecule	trichlormethiazide	C03AA06	SLC12A1,ATP1A1,CA1,CA2,CA4,TPMT	0	0	0	0	0
DB01023	approved, investigational	small molecule	felodipine	C08CA02	CACNA1C,CACNA2D1,CACNB2,CACNA1D,CACNA1S,CACNA1H,CACNA2D2,CALM1,PDE1B,PDE1A,NR3C2,TNNC2,TNNC1,CYP3A4,CYP3A5,CYP3A7,CYP2C8,CYP2C9,CYP2D6,ABCB1	0	0	0	0	0
DB01024	approved	small molecule	mycophenolic acid	L04AA06	IMPDH1,IMPDH2,UGT1A1,UGT1A9,UGT2B7,UGT1A7,UGT1A6	1	0	0	0	0
DB01026	approved, investigational	small molecule	ketoconazole	D01AC08,G01AF11,J02AB02	ERG11,AR,CYP21A2,CYP19A1,CYP3A4,CYP2D6,CYP2C9,CYP2C19,CYP3A5,CYP3A7,CYP2C8,CYP1A2,CYP1A1,CYP11A1,CYP11B1,CYP1B1,CYP26A1,CYP2A6,CYP2B6,CYP51A1,ABCB11,ABCB1,SLCO1A2	0	0	0	1	1
DB01028	approved	small molecule	methoxyflurane	N02BG09	GABRA1,GRIA1,GLRA1,ATP2C1,KCNA1,ATP5D,MT-ND1,GABRA1,GABRA2,GABRA3,GABRA4,GABRA5,GABRA6,GABRB1,GABRB2,GABRB3,GABRD,GABRE,GABRG1,GABRG2,GABRG3,GABRP,GABRQ,CYP2E1,CYP1A2,CYP2A6,CYP2B6,CYP2C9,CYP2D6,CYP3A4	0	0	0	0	0
DB01029	approved, investigational	small molecule	irbesartan	C09CA04	AGTR1,JUN,CYP2C8,CYP2C9,UGT1A3,PTGS1,CYP1A2,CYP2D6,CYP3A4	0	0	0	0	0
DB01030	approved, investigational	small molecule	topotecan	L01XX17	TOP1,TOP1MT,CYP3A4,ABCG2,ABCB1	0	0	0	0	1
DB01032	approved	small molecule	probenecid	M04AB01	SLC22A6,SLC22A11,SLC22A8,PANX1,CYP2C9,CYP2C19,CYP2C8,CYP3A4,ALB,SLC22A2,SLC22A1,ABCC3,ABCC4,ABCC5,SLC16A7,SLC22A5,ABCC6,ABCB1,ABCC1,SLCO1A2,SLC16A1,SLC10A1,SLC22A6,SLC22A10,SLC22A8,ABCC2,ABCC11,SLC22A11,SLCO1C1,SLC22A7,SLC22A12,SLC2A9	0	0	0	0	0
DB01033	approved	small molecule	mercaptopurine	L01BB02	HPRT1,PPAT,IMPDH1,IMPDH2,TPMT,XDH,AOX1,SLC22A8,ABCC4,ABCC5,SLC28A2,SLC28A3,SLC29A1,SLC29A2	1	0	0	0	1
DB01035	approved	small molecule	procainamide	C01BA02	SCN5A,DNMT1,CYP2D6,BCHE,SLC22A2,SLC22A1,SLC22A3,SLC22A5,SLC22A4	0	0	0	0	0
DB01036	approved, investigational	small molecule	tolterodine	G04BD07	CHRM3,CHRM2,CHRM5,CHRM1,CHRM4,CYP3A4,CYP2D6,CYP2C9,CYP2C19	1	0	0	0	0
DB01037	approved, investigational	small molecule	selegiline	N04BD01	MAOB,MAOA,CYP2B6,CYP3A4,CYP2A6,CYP1A2,CYP2C19,CYP2C8,CYP2C9,CYP2D6,CYP2E1,ABCB1	0	0	0	0	0
DB01039	approved	small molecule	fenofibrate	C10AB05	PPARA,mmp20,CYP2C8,CYP2C9,CYP3A4	0	0	0	0	0
DB01041	approved, investigational, withdrawn	small molecule	thalidomide	L04AX02	CRBN,TNF,NFKB1,FGFR2,PTGS2,ORM1,ORM2,CYP2C19,CYP1A1,CYP2E1,CYP2C9,PTGS1,PTGS2,CYP3A5,CYP1A2	0	0	1	1	0
DB01043	approved, investigational	small molecule	memantine	N06DX01	GRIN3A,GRIN2A,GRIN2B,HTR3A,CHRFAM7A,DRD2,GRIN1,CYP2B6,CYP2A6,CYP2C19,SLC22A2	0	0	0	0	1
DB01044	approved, investigational	small molecule	gatifloxacin	J01MA16,S01AE06	gyrA,gyrB,parC,parE,ALB	0	0	0	1	0
DB01045	approved	small molecule	rifampicin	J04AB02	rpoB,rpoC,NR1I2,SLCO1B1,SLCO1A2,SLCO1B3,CYP51A1,ALB,SLCO2B1,CYP2C9,CYP1A2,CYP2C8,CYP3A4,CYP2B6,UGT1A1,CYP2C19,CYP2A6,CYP2E1,CYP3A43,CYP3A5,CYP3A7,CYP4A11,ABCB1,SLCO1B3,ABCC1,SLCO2B1,ABCB11,SLCO1A2,SLC22A7,SLCO1B1,ABCC5,ABCC2,ABCC3	0	0	0	0	0
DB01049	approved	small molecule	ergoloid mesylate	C04AE01	ADRA2A,ADRA2B,ADRA2C,ADRA1A,ADRA1B,ADRA1D,SLCO2B1,HTR1A,HTR1B,HTR1D,HTR1E,HTR1F,HTR2A,HTR2B,HTR2C,HTR3A,HTR3B,HTR3C,HTR3D,HTR3E,HTR4,HTR6,HTR7,DRD1,DRD2,GABRA1,GABRA2,GABRA3,GABRA4,GABRA5,GABRA6,GABRB1,GABRB2,GABRB3,GABRD,GABRE,GABRG1,GABRG2,GABRG3,GABRP,GABRQ,CYP3A4	0	0	0	0	0
DB01050	approved	small molecule	ibuprofen	C01EB16,G02CC01,M01AE01,M02AA13	PTGS2,PTGS1,BCL2,THBD,PLAT,FABP2,PPARG,CFTR,CYP2C9,CYP2C8,CYP2C19,UGT1A1,UGT1A3,UGT1A9,UGT2B4,UGT2B7,PTGS1,PTGS2,ALB,SLCO2B1,ABCB1,ABCC4,ABCC1,SLCO1A2,SLC22A6,SLC22A8,SLC22A11	0	1	0	0	0
DB01051	approved	small molecule	novobiocin		gyrB,topA,ABCB11,SLC22A6,SLC22A8,SLC22A11,ABCG2	0	0	0	1	0
DB01053	approved	small molecule	benzylpenicillin	J01CE01,S01AA14	pbp3,bla,SLC22A8,SLC15A1,SLC15A2,SLC22A5,SLC15A1,SLC15A2,SLC22A6,SLC22A8,SLC22A4,SLC22A11,SLCO2B1,SLCO4A1,SLCO3A1,SLCO1B1	0	0	0	1	0
DB01054	approved	small molecule	nitrendipine	C08CA08	CACNA1C,CACNA2D1,CACNB2,CACNG1,CACNA1D,CACNA1S,CACNA2D2,CACNA1H,CYP3A4,CYP3A5,CYP3A7,ABCB1	0	0	0	1	0
DB01058	approved	small molecule	praziquantel	P02BA01	CYP3A4,CYP1A2,CYP2C19,CYP2D6,CYP3A43,CYP3A5,CYP3A7	0	0	0	0	0
DB01059	approved	small molecule	norfloxacin	J01MA06,S01AE02	parC,gyrA,TOP2A,CYP1A2,CYP3A4,CYP3A5,CYP3A7,CYP1A1,CYP2A6,SLC22A5,SLC22A6	0	0	0	0	0
DB01060	approved	small molecule	amoxicillin	J01CA04	pbpA,CYP2C19,SLC15A1,SLC15A2,SLC22A6	0	0	0	0	0
DB01062	approved, investigational	small molecule	oxybutynin	G04BD04	CHRM3,CHRM2,CHRM1,CYP3A4,CYP2C8,CYP2D6,CYP3A5	0	0	0	0	0
DB01064	approved	small molecule	isoprenaline	C01CA02,R03AB02,R03CB01	ADRB1,ADRB2,ADRB3,MAPK1,PIK3R1,PIK3R2,PIK3R3,PDE4,CYP1A1	0	0	0	1	0
DB01065	approved, nutraceutical	small molecule	melatonin	N05CH01	MTNR1A,MTNR1B,ESR1,RORB,CALM1,MPO,EPX,CALR,ASMT,NQO2,CYP1A1,CYP1A2,CYP1B1,CYP2C19,CYP2C9,ASMT,IDO1,MPO,CYP19A1,SLC22A8	0	0	0	0	0
DB01068	approved, illicit	small molecule	clonazepam	N03AE01	GABRA1,GABRA2,GABRA3,GABRA4,GABRA5,GABRA6,GABRB1,GABRB2,GABRB3,GABRD,GABRE,GABRG1,GABRG2,GABRG3,GABRP,GABRQ,TSPO,CYP3A4,CYP2E1,NAT2,ALB	0	1	0	0	0
DB01069	approved	small molecule	promethazine	D04AA10,R06AD02	HRH1,DRD2,CHRM1,CHRM2,CHRM3,CHRM4,CHRM5,ADRA1A,HTR2A,CALM1,CYP2D6,CYP2B6,CYP2C9,ABCB1	0	1	0	0	0
DB01072	approved, investigational	small molecule	atazanavir	J05AE08	pol,CYP3A4,CYP2C9,ABCB1,ABCC1	0	0	0	0	0
DB01073	approved	small molecule	fludarabine	L01BB05	RRM1,POLA1,DCK,SLC29A1,SLC28A3	0	0	0	0	0
DB01074	approved	small molecule	perhexiline	C08EX02	CPT1A,CPT2,CYP2D6,CYP2B6,CYP3A4	0	0	0	0	0
DB01075	approved	small molecule	diphenhydramine	D04AA32,R06AA02	HRH1,CYP2D6,CYP1A2,CYP2C9,CYP2C19,CYP2C18,CYP2B6,PTGS1,SLC22A2,SLC22A1,SLC22A5	0	1	0	0	0
DB01076	approved	small molecule	atorvastatin	C10AA05	HMGCR,DPP4,AHR,CYP3A4,CYP3A5,CYP3A7,CYP2C8,CYP2D6,CYP2C9,CYP2C19,CYP2B6,UGT1A1,UGT1A3,UGT2B7,ABCB1,SLCO1A2,SLCO1B1,ABCC4,ABCC5,ABCC1,SLCO2B1,SLCO1B3,ABCC2	0	0	0	0	0
DB01079	investigational, withdrawn	small molecule	tegaserod	A06AX06	HTR4,HTR2B,HTR2C,HTR2A,CYP1A2,CYP2C8,CYP2C9,CYP2D6,CYP2E1,SLC6A4	0	0	1	1	0
DB01083	approved, investigational	small molecule	orlistat	A08AB01	PNLIP,LIPF,FASN,CYP3A4,PLA2G4A	0	0	0	0	0
DB01085	approved	small molecule	pilocarpine	N07AX01,S01EB01	CHRM3,CHRM1,CHRM2,CYP2A6,CYP2E1,CYP3A4	0	0	0	0	0
DB01087	approved	small molecule	primaquine	P01BA03	KRT7,NQO2,CYP3A4,CYP1A2,CYP2D6,CYP1A1,CYP1B1	1	0	0	0	0
DB01088	approved, investigational	small molecule	iloprost	B01AC11	PTGIR,PTGER1,PDE4A,PDE4B,PDE4C,PDE4D,PLAT,SLCO2B1,SLCO2A1,SLCO3A1	0	0	0	0	0
DB01092	approved	small molecule	ouabain	C01AC01	ATP1A1,CYP1A1,SLCO1A2,SLC22A8,SLCO4C1,SLCO1B3,SLCO1C1,SLCO1B1	0	0	0	0	0
DB01094	approved	small molecule	hesperetin		SOAT1,SOAT2,MTTP,CYP1A2,ABCG2	0	0	0	0	0
DB01095	approved	small molecule	fluvastatin	C10AA04	HMGCR,CYP1A1,CYP1A2,CYP3A4,CYP3A5,CYP2B6,CYP2C8,CYP2C9,CYP2C19,CYP2D6,UGT1A1,UGT1A3,UGT2B7,SLCO1B1,SLCO1B3,SLCO2B1,SLC15A1	0	0	0	0	0
DB01097	approved, investigational	small molecule	leflunomide	L04AA13	DHODH,AHR,PTK2B,CYP2C9,CYP1A2,ABCG2	0	0	0	0	0
DB01098	approved	small molecule	rosuvastatin	C10AA07	HMGCR,CYP2C9,CYP2C19,CYP3A4,CYP3A5,ALB,ABCC1,ABCC4,SLCO1A2,SLCO1B1,SLCO1B3,SLCO2B1,SLC7A11,ABCB11,ABCG2	0	0	0	0	0
DB01100	approved	small molecule	pimozide	N05AG02	DRD2,DRD3,KCNH2,CALM1,CYP3A5,CYP3A7,CYP3A4,CYP1A2,CYP2C19,CYP2D6,CYP2E1,ABCB1	1	1	0	0	0
DB01101	approved, investigational	small molecule	capecitabine	L01BC06	TYMS,TYMP,CES1,DPYD,CDA,CYP2C9	1	0	0	0	0
DB01103	approved	small molecule	quinacrine	P01AX05	PLA2G6,PLA2G4A,PLCL1,HNMT,CYP3A4,CYP3A5,SLC22A2,ABCB1	0	0	0	1	0
DB01104	approved	small molecule	sertraline	N06AB06	SLC6A4,SLC6A3,CYP3A4,CYP2D6,CYP2C19,CYP2C9,CYP2B6,CYP1A2,MAOB,MAOA,CYP2B,ABCB1	0	0	0	0	0
DB01107	approved, illicit, withdrawn	small molecule	methyprylon	N05CE02	GABRA1,GABRA1,GABRA2,GABRA3,GABRA4,GABRA5,GABRA6,GABRB1,GABRB2,GABRB3,GABRD,GABRE,GABRG1,GABRG2,GABRG3,GABRP,GABRQ,CYP2D6	0	0	1	1	0
DB01110	approved, investigational	small molecule	miconazole	A01AB09,A07AC01,D01AC02,G01AF04,J02AB01,S02AA13	ERG11,NOS3,NOS2,KCNMA1,KCNMB1,KCNMB2,KCNMB3,KCNMB4,KCNN4,KCNN1,KCNN2,KCNN3,KCNH2,KCNH6,KCNH7,CYP3A4,CYP2D6,CYP2C9,CYP11B1,CYP19A1,CYP1A2,CYP2A6,CYP2B6,CYP2C19,CYP2E1,ABCB1	0	0	0	0	0
DB01114	approved	small molecule	chlorphenamine	R06AB04	HRH1,SLC6A4,SLC6A2,SLC6A3,CYP3A7,CYP3A4,CYP2D6,CYP3A5,SLC22A2,SLC22A1	0	0	0	0	0
DB01115	approved	small molecule	nifedipine	C08CA05	CACNA1C,CACNA2D1,CACNB2,CACNA1D,CACNA1S,CALM1,KCNA1,CACNA1H,CYP3A4,CYP3A5,CYP3A7,CYP1A2,CYP2A6,CYP2C8,CYP2D6,CYP2E1,CYP1A1,CYP2B6,CYP2C9,ABCC3,ABCB1,ABCC2	0	1	0	0	0
DB01118	approved, investigational	small molecule	amiodarone	C01BD01	KCNH2,ADRB1,CACNA1H,CACNA2D2,CYP3A4,CYP2C8,CYP2D6,CYP2C9,CYP1A2,CYP2C19,CYP1A1,CYP3A5,CYP3A7,CYP2A6,ABCB1	0	1	0	0	0
DB01119	approved	small molecule	diazoxide	C02DA01,V03AH01	KCNJ11,CA1,CA2,ATP1A1,KCNMA1,SLC12A3,GLUL	0	0	0	0	0
DB01120	approved	small molecule	gliclazide	A10BB09	ABCC8,VEGFA,CYP2C9,CYP2C19,ALB	0	0	0	0	0
DB01124	approved	small molecule	tolbutamide	A10BB03,V04CA01	ABCC8,KCNJ1,CYP2C9,CYP2C8,CYP2C19,CYP2C18,SLC15A1,SLCO1A2,SLC22A6,SLC15A2,SLCO2B1	0	0	0	0	0
DB01128	approved	small molecule	bicalutamide	L02BB03	AR,CYP3A4,CYP2C19,CYP2C9,CYP2D6	0	0	0	1	0
DB01129	approved, investigational	small molecule	rabeprazole	A02BC04	ATP4A,CYP3A4,CYP2C19,CYP1A1,CYP1A2,CYP2C9,CYP2D6,ABCG2	1	1	0	0	0
DB01131	approved	small molecule	proguanil	P01BB01	DHFR,CYP2C19,CYP2D6,CYP1A2,CYP2C9,CYP2E1,CYP3A4	0	0	0	0	0
DB01132	approved, investigational	small molecule	pioglitazone	A10BG03	PPARG,CYP2C8,CYP3A4,PTGS1,CYP2C19,CYP2C9,CYP2D6,SLCO1B3,SLCO1B1	0	0	0	0	1
DB01136	approved, investigational	small molecule	carvedilol	C07AG02	ADRB1,ADRA1A,NDUFC2,ADRB2,VEGFA,NPPB,GJA1,KCNH2,VCAM1,ADRA1D,ADRA1B,ADRA2C,ADRA2B,ADRA2A,SELE,HIF1A,XDH,CYP2C9,CYP2D6,CYP1A2,CYP3A4,CYP1A1,CYP2E1,PTGS1,ABCB1	1	0	0	0	0
DB01137	approved, investigational	small molecule	levofloxacin	J01MA12,S01AE05	parC,gyrA,TOP2A,CYP1A2,CYP3A4,ABCB1,SLC22A6,SLC22A2,SLC22A4	0	0	0	0	0
DB01138	approved	small molecule	sulfinpyrazone	M04AB02	ABCC2,ABCC1,CYP2C9,CYP3A4,CYP2B6,CYP2C8,FABP2,ABCC3,ABCC4,ABCC5,ABCC6,ABCB1,ABCC1,ABCC2	0	0	0	0	0
DB01140	approved, withdrawn	small molecule	cefadroxil	J01DB05	pbp3,pbpA,pbp1b,penA,SLC15A1,SLC22A5,SLC22A6,SLC15A2,SLC22A8	0	0	1	0	0
DB01142	approved	small molecule	doxepin	N06AA12	HRH1,HRH2,SLC6A2,SLC6A4,HTR2A,HTR2B,HTR2C,CHRM1,CHRM2,CHRM3,CHRM4,CHRM5,ADRA1A,ADRA1B,ADRA1D,HTR1A,ADRA2A,ADRA2B,ADRA2C,DRD2,HTR6,HRH4,KCNH2,CYP2D6,CYP2C19,CYP2C9,CYP1A2,CYP3A4,ORM1,ABCB1	1	1	0	0	0
DB01144	approved	small molecule	diclofenamide	S01EC02	CA1,CA2,CA4,CA7,CYP2C9	0	0	0	0	0
DB01147	approved	small molecule	cloxacillin	J01CF02	pbpA,ampC,pbp2a,penA,pbpB,dacA,ALB,SLC15A1,SLC15A2,SLC22A6	0	0	0	0	0
DB01149	approved, withdrawn	small molecule	nefazodone	N06AX06	HTR2A,HTR2C,SLC6A4,HTR1A,SLC6A2,SLC6A3,ADRA1B,ADRA2A,ADRA1A,CYP3A5,CYP3A7,CYP3A4,CYP2B,CYP2D6,ABCB1	1	0	1	1	0
DB01151	approved	small molecule	desipramine	N06AA01	SLC6A2,SLC6A4,HTR2A,ADRB2,ADRB1,SMPD1,HRH1,ADRA1A,ADRA1B,ADRA1D,CHRM1,CHRM2,CHRM3,CHRM4,CHRM5,snf,HTR1A,HTR2C,DRD2,ADRA2A,ADRA2B,ADRA2C,CYP2D6,CYP2C19,CYP2C18,CYP1A2,CYP3A4,CYP2A6,CYP2B6,CYP2E1,ORM1,ABCB1,SLC22A1,SLC22A2,SLC22A3,SLC22A5,SLC22A4	1	1	0	0	0
DB01156	approved	small molecule	bupropion	N06AX12	SLC6A3,SLC6A2,CHRNA3,CYP2B6,CYP2D6,CYP1A2,CYP2A6,CYP2C8,CYP2C9,CYP2E1,CYP3A4,ORM1	0	0	0	0	0
DB01159	approved	small molecule	halothane	N01AB01	KCNK3,KCNK9,KCNMA1,GRIN3A,GRIN3B,GRIN2A,GLRA1,RHO,KCNJ6,KCNJ3,MT-ND1,KCNN4,ATP5D,ATP2C1,GABRA1,GNG2,NPSR1,GABRA1,GABRA2,GABRA3,GABRA4,GABRA5,GABRA6,GABRB1,GABRB2,GABRB3,GABRD,GABRE,GABRG1,GABRG2,GABRG3,GABRP,GABRQ,CYP2E1,CYP3A4,CYP2A6,CYP2B6,CYP2C9,CYP2D6,ALB	0	0	0	0	0
DB01160	approved	small molecule	dinoprost tromethamine		PTGFR,PTGIR,SLC22A2,SLC22A6,SLC22A7,SLC22A8,SLC22A11,SLCO2A1,SLCO3A1	0	0	0	0	0
DB01161	approved	small molecule	chloroprocaine	N01BA04	SCN10A,GRIN3A,CHRNA10,HTR3A,SLC6A3,BCHE	0	0	0	0	0
DB01162	approved	small molecule	terazosin	G04CA03	ADRA1A,ADRA1B,ADRA1D,KCNH2,KCNH6,KCNH7,ABCB1	0	1	0	0	0
DB01165	approved	small molecule	ofloxacin	J01MA01,S01AE01,S02AA16	parC,gyrA,TOP2A,CYP1A2,SLC22A5,ABCC1,SLC22A6,ABCC2,SLC22A4	0	0	0	0	0
DB01166	approved	small molecule	cilostazol	B01AC23	PDE3A,CYP3A5,CYP3A7,CYP2C19,CYP3A4,CYP1A2,CYP2D6	0	0	0	0	0
DB01167	approved, investigational	small molecule	itraconazole	J02AC02	CYP51A1,ERG11,CYP3A5,CYP3A7,CYP3A4,CYP2D6,CYP2B6,CYP1A1,CYP2E1,ABCB1	0	0	0	0	0
DB01169	approved, investigational	small molecule	arsenic trioxide	L01XX27	IKBKB,TXNRD1,JUN,CCND1,MAPK3,MAPK1,AKT1,CYP1A1,CYP1B1,CYP3A4,ABCC2,ABCB1	1	0	0	0	0
DB01171	approved	small molecule	moclobemide	N06AG02	MAOA,MAOA,MAOB,CYP2C19,CYP2D6,CYP1A2,CYP2C9	0	0	0	0	0
DB01173	approved	small molecule	orphenadrine		GRIN2D,GRIN1,GRIN3B,GRIN3A,HRH1,SLC6A2,SCN10A,CYP2B6,CYP3A4,CYP2E1	0	1	0	0	0
DB01174	approved	small molecule	phenobarbital	N03AA02	GABRA1,CHRNA4,CHRNA7,GRIA2,GRIK2,GRIN1,GRIN2A,GRIN2B,GRIN2C,GRIN2D,GRIN3A,GRIN3B,CYP2C19,CYP2C9,CYP2B6,CYP2C8,CYP3A4,CYP1A2,CYP2A6,CYP2E1,CYP3A5,CYP4A11,CYP1A1,CYP1B1,CYP2C18,CYP3A7,CYP4B1,ABCB1,ABCC3,ABCB11,ABCC1,SLCO2A1,ABCC2	0	1	0	1	0
DB01175	approved, investigational	small molecule	escitalopram	N06AB10	SLC6A4,SLC6A3,SLC6A2,ADRA1A,CHRM1,HRH1,CYP3A4,CYP2C19,CYP2D6	0	0	0	0	0
DB01179	approved	small molecule	podofilox	D06BB04	TOP2A,TUBA4A,TUBB,CYP2C19,CYP3A4	0	0	0	0	0
DB01181	approved	small molecule	ifosfamide	L01AA06	CYP2B6,CYP3A4,CYP3A5,CYP2C19,CYP2C9,CYP2C8,CYP2A6,CYP2C18,PTGS1,CYP3A7	0	0	0	0	0
DB01182	approved	small molecule	propafenone	C01BC03	SCN5A,KCNH2,CYP2D6,CYP3A4,CYP1A2,CYP2C9,CYP2C8,ABCB1	1	0	0	0	0
DB01183	approved	small molecule	naloxone	V03AB15	OPRM1,OPRD1,OPRK1,CREB1,ESR1,TLR4,CYP2C8,CYP3A4,ALB,SLCO1A2,ABCB1	0	0	0	0	0
DB01184	approved, investigational	small molecule	domperidone	A03FA03	DRD2,DRD3,CYP3A5,CYP3A7,CYP3A4,CYP1A2,CYP2B6,CYP2C8,CYP2D6,ABCB1	0	0	0	0	0
DB01185	approved, illicit	small molecule	fluoxymesterone	G03BA01	AR,ESR1,PRLR,NR3C1,SHBG	0	0	0	0	0
DB01186	approved, withdrawn	small molecule	pergolide	N04BC02	DRD2,DRD3,DRD4,HTR1A,HTR2B,HTR2A,HTR1D,ADRA2B,ADRA2A,ADRA2C,DRD5,DRD1,HTR1B,HTR2C,ADRA1A,ADRA1B,ADRA1D,CYP3A4,CYP2D6	0	0	1	1	0
DB01189	approved	small molecule	desflurane	N01AB07	GABRA1,GABRA2,GABRA3,GABRA4,GABRA5,GABRA6,GABRB1,GABRB2,GABRB3,GABRD,GABRE,GABRG1,GABRG2,GABRG3,GABRP,GABRQ,GLRA1,GRIA1,KCNA1,ATP2C1,ATP5D,MT-ND1,ALB	0	0	0	0	0
DB01191	approved, illicit, withdrawn	small molecule	dexfenfluramine	A08AA04	SLC6A4,HTR2C,CYP2D6,CYP1A2,CYP2A6,CYP2C19,CYP2C9,CYP2E1	0	0	1	1	0
DB01193	approved	small molecule	acebutolol	C07AB04	ADRB1,ADRB2,CYP2D6,SLC22A1,ABCB1	0	0	0	0	0
DB01194	approved	small molecule	brinzolamide	S01EC04	CA2,CA1,CA4,CA5A,CYP3A4	0	0	0	0	0
DB01196	approved	small molecule	estramustine	L01XX11	MAP2,MAP1A,ESR1,ESR2,CYP3A4,ABCB1	0	0	0	0	0
DB01197	approved	small molecule	captopril	C09AA01	ACE,MMP2,LTA4H,CYP2D6,ALB,ABCB1,SLC15A1,SLC22A6	0	0	0	0	0
DB01198	approved	small molecule	zopiclone	N05CF01	GABRA1,GABRA2,GABRA3,GABRA5,TSPO,CYP3A4,CYP2C8,CYP2C9,PTGS1,CYP2E1	0	0	0	1	0
DB01199	approved	small molecule	tubocurarine	M03AA02	CHRNA2,HTR3A,ACHE,SLC22A1,SLC22A2	0	0	0	0	0
DB01200	approved, investigational	small molecule	bromocriptine	G02CB01,N04BC01	DRD2,DRD3,HTR1D,ADRA2A,HTR1A,ADRA2C,ADRA2B,HTR2B,DRD4,HTR2A,HTR1B,HTR2C,DRD5,DRD1,ADRA1A,ADRA1B,ADRA1D,HTR7,CYP3A4,CYP1A2,ABCB1	0	0	0	0	0
DB01201	approved	small molecule	rifapentine	J04AB05	rpoC,CYP2C9,CYP3A4,CYP2C8,CYP2D6,CYP3A43,CYP3A5,CYP3A7	0	0	0	0	0
DB01204	approved, investigational	small molecule	mitoxantrone	L01DB07	TOP2A,CYP2E1,CYP1B1,CYP3A4,ABCB1,ABCC1,ABCG2	0	0	0	0	0
DB01205	approved	small molecule	flumazenil	V03AB25	GABRA1,GABRG2,GABRA5,GABRA1,GABRA2,GABRA3,GABRA4,GABRA5,GABRA6,GABRB1,GABRB2,GABRB3,GABRD,GABRE,GABRG1,GABRG2,GABRG3,GABRP,GABRQ	0	0	0	0	0
DB01208	approved	small molecule	sparfloxacin	J01MA09	parC,gyrA,TOP2A,SLC22A5,ABCC2,ABCB1	0	0	0	0	0
DB01211	approved	small molecule	clarithromycin	J01FA09	rplJ,ABCB1,KCNH2,CYP3A4,SLCO1B1,SLCO1B3,CYP3A4,CYP3A5,CYP3A7,CYP2C19,CYP1A2,ABCB1,SLC22A7	0	0	0	0	0
DB01212	approved	small molecule	ceftriaxone	J01DD04	penA,SLC22A11,SLC22A6,SLC22A8,SLC15A1,GLUL,ALB,SLC15A1,SLC15A2,SLC22A6,SLC22A8,SLC22A11	0	0	0	0	0
DB01213	approved	small molecule	fomepizole	V03AB34	ADH1A,ADH1B,ADH1C,CAT,CYP2E1,CYP2A6	0	0	0	0	0
DB01215	approved, illicit	small molecule	estazolam	N05CD04	GABRA1,GABRA2,GABRA3,GABRA5,GABRG1,GABRG2,GABRG3,GABRB1,GABRB2,GABRB3,GABRD,GABRE,GABRP,GABRR1,GABRR2,GABRR3,GABRA1,GABRA2,GABRA3,GABRA4,GABRA5,GABRA6,GABRB1,GABRB2,GABRB3,GABRD,GABRE,GABRG1,GABRG2,GABRG3,GABRP,GABRQ,CYP3A4	0	1	0	0	0
DB01216	approved	small molecule	finasteride	D11AX10,G04CB01	SRD5A2,SRD5A1,AKR1D1,CYP3A5,CYP3A7,CYP3A4	0	0	0	0	0
DB01217	approved, investigational	small molecule	anastrozole	L02BG03	CYP19A1,CYP19A1,CYP1A2,CYP2C9,CYP3A4	1	0	0	0	0
DB01218	approved	small molecule	halofantrine	P01BX01	KCNH2,CYP2D6,CYP3A4,CYP3A5,CYP2C8	0	0	0	0	0
DB01221	approved	small molecule	ketamine	N01AX03	GRIN3A,TACR1,DRD2,OPRD1,SLC6A2,OPRK1,OPRM1,CHRM1,CHRM2,CHRM3,CHRM4,CHRM5,HTR2A,HTR2B,HTR2C,HTR1A,HTR1B,HTR1D,HTR1E,HTR1F,CYP2C9,CYP3A4,CYP2B6,PTGS1,CYP2C8,ABCB1	0	0	0	0	0
DB01223	approved	small molecule	aminophylline	R03DA05	PDE3A,ADORA1,ADORA3,HDAC2,CYP1A2,CYP2E1,CYP3A4	0	0	0	1	0
DB01224	approved	small molecule	quetiapine	N05AH04	HTR2A,DRD2,HTR1A,HTR1B,HTR1D,HTR1E,HTR2C,HTR3A,HTR6,HTR7,DRD1,DRD5,DRD3,DRD4,HRH1,ADRA1A,ADRA1B,ADRA1D,ADRA2A,ADRA2B,ADRA2C,CHRM1,CHRM2,CHRM3,CHRM4,CHRM5,CYP3A5,CYP3A7,CYP3A4,CYP2C19,CYP2D6,ABCB1	0	1	0	0	0
DB01227	approved	small molecule	levomethadyl acetate	N07BC03	OPRM1,CHRNB4,CHRNA3,CYP3A5,CYP3A7,CYP3A4,CYP19A1	0	0	0	1	0
DB01229	approved	small molecule	paclitaxel	L01CD01	TUBB1,BCL2,NR1I2,MAP4,MAP2,MAPT,CYP2C9,CYP3A5,CYP3A7,CYP2C8,CYP3A4,CYP19A1,CYP1B1,ABCB11,ABCB1,ABCC1,ABCC10,SLCO1B3,ABCG2,ABCC2	0	0	0	0	1
DB01232	approved, investigational	small molecule	saquinavir	J05AE01	pol,CYP3A7,CYP3A5,CYP3A4,CYP11A1,CYP2C19,CYP2C8,CYP2C9,CYP2D6,ORM1,ALB,ABCB1,SLC22A1,SLCO1A2,ABCG2,SLCO1B1,ABCC1,ABCC2	0	0	0	0	0
DB01233	approved, investigational	small molecule	metoclopramide	A03FA01	DRD2,CHRM1,HTR4,HTR3A,CYP2D6,CYP11B1,CYP11B2,CYP17A1	1	1	0	0	0
DB01234	approved, investigational	small molecule	dexamethasone	A01AC02,C05AA09,D07AB19,D07XB05,D10AA03,H02AB02,R01AD03,S01BA01,S01CB01,S02BA06,S03BA01	NR3C1,NR0B1,ANXA1,NOS2,CYP3A4,CYP3A5,CYP3A7,CYP2C9,CYP11A1,CYP17A1,CYP19A1,CYP1A1,CYP1B1,CYP2A6,CYP2B6,CYP2C19,CYP2C8,CYP2D6,CYP2E1,CYP3A43,CYP4A11,ABCB11,ABCB1,ABCC2,SLCO1A2,ABCG2	0	0	0	0	1
DB01235	approved	small molecule	l-dopa	N04BA01	DRD1,DRD5,DRD2,DRD3,DRD4,DDC,CYP2D6,SLC15A1,SLC16A10,SLC7A5,SLC7A8	0	0	0	0	0
DB01236	approved	small molecule	sevoflurane	N01AB08	GABRA1,GLRA1,GRIA1,KCNA1,ATP2C1,ATP5D,MT-ND1,GABRA1,GABRA2,GABRA3,GABRA4,GABRA5,GABRA6,GABRB1,GABRB2,GABRB3,GABRD,GABRE,GABRG1,GABRG2,GABRG3,GABRP,GABRQ,CYP2E1,CYP2A6,CYP2B6,CYP3A4,ALB	0	0	0	0	0
DB01238	approved, investigational	small molecule	aripiprazole	N05AX12	HTR2A,DRD2,HTR1A,HTR1B,HTR1D,HTR1E,HTR2C,HTR3A,HTR6,HTR7,DRD1,DRD5,DRD3,DRD4,HRH1,ADRA1A,ADRA1B,ADRA2A,ADRA2B,ADRA2C,CHRM1,CHRM2,CHRM3,CHRM4,CHRM5,CYP3A5,CYP3A7,CYP2D6,CYP3A4	1	1	0	0	1
DB01239	approved, withdrawn	small molecule	chlorprothixene	N05AF03	DRD2,DRD1,DRD3,HTR2A,HTR2B,HTR2C,HRH1,CHRM1,CHRM2,CHRM3,CHRM4,CHRM5,ABCB1	0	0	1	0	0
DB01241	approved	small molecule	gemfibrozil	C10AB04	PPARA,CYP2C8,CYP1A2,CYP3A4,CYP2C19,CYP2C9,SLCO1B1	0	0	0	1	0
DB01242	approved	small molecule	clomipramine	N06AA04	SLC6A4,HTR2A,HTR2B,HTR2C,SLC6A2,GSTP1,snf,CYP2D6,CYP2C19,CYP1A2,CYP3A4,ALB,ABCB1	1	1	0	0	0
DB01244	approved, withdrawn	small molecule	bepridil	C08EA02	CACNA1A,CACNA1H,CACNA2D2,ATP1A1,KCNQ1,TNNC1,CALM1,PDE1B,PDE1A,CYP2D6,ABCB1	0	0	1	0	0
DB01248	approved, investigational	small molecule	docetaxel	L01CD02	TUBB1,BCL2,MAP2,MAP4,MAPT,NR1I2,CYP3A4,CYP3A5,CYP3A7,CYP1B1,ABCB1,ABCC10,SLCO1B3,SLC22A7,ABCG2,ABCC2,ABCC1	0	0	0	0	1
DB01254	approved, investigational	small molecule	dasatinib	L01XE06	ABL1,SRC,EPHA2,LCK,YES1,KIT,PDGFRB,STAT5B,ABL2,FYN,CYP3A4,CYP1A1,CYP1A2,CYP1B1,CYP3A5,FMO3,ABCB1,ABCG2	1	0	0	0	0
DB01259	approved, investigational	small molecule	lapatinib	L01XE07	EGFR,ERBB2,CYP3A4,CYP3A5,CYP2C8,CYP2C19,ABCB1,TAP1	1	0	0	0	1
DB01267	approved	small molecule	paliperidone	N05AX13	HTR2A,DRD2,HRH1,ADRA1A,ADRA1B,DRD4,HTR1D,DRD3,HTR2C,ADRA2A,ADRA2B,ADRA2C,HTR1A,DRD1,CYP3A4,CYP2D6,CYP3A5	0	1	0	0	1
DB01268	approved, investigational	small molecule	sunitinib	L01XE04	PDGFRB,FLT1,KIT,KDR,FLT4,FLT3,CSF1R,PDGFRA,CYP3A5,CYP3A7,CYP3A4,ABCC4,ABCB1,ABCC2,ABCG2	0	0	0	0	0
DB01274	approved, investigational	small molecule	arformoterol		ADRB2,CYP2D6,CYP2C19,CYP2A6,CYP2C9	1	0	0	0	0
DB01283	approved, investigational	small molecule	lumiracoxib	M01AH06	PTGS2,PTGS1,CYP2C9,CYP2C19,UGT1A9,CYP1A2	0	0	0	1	1
DB01285	approved	biotech	corticotropin	H01AA01	MC2R,CRH,HSD3B2,CYP27B1,CYP24A1	0	0	0	0	0
DB01296	approved	small molecule	glucosamine	M01AX05	NFKB2,TNF,IFNG,csn,CYP2C19,CYP2E1	0	0	0	0	0
DB01303	approved	small molecule	oxtriphylline	R03DA02	PDE3A,PDE4A,ADORA2A,ADORA1,HDAC2,CYP1A2,SLC22A7	0	0	0	0	0
DB01320	approved	small molecule	fosphenytoin	N03AB05	SCN5A,CYP2C9,CYP2C8,CYP2C19,CYP3A4,CYP2B6,ALB	0	0	0	0	0
DB01325	approved	small molecule	quinethazone	C03BA02	CA1,CA2,SLC12A1,SLC12A2,SLC12A3	0	0	0	0	0
DB01326	approved	small molecule	cefamandole	J01DC03	pbpA,SLC22A6,SLC22A8,SLC22A11,SLC22A7	0	0	0	0	0
DB01327	approved	small molecule	cefazolin	J01DB04	mrcA,mrcB,pbpC,mrdA,ftsI,PON1,TPMT,ALB,ABCC4,SLC22A6,SLC22A8,SLC22A11	0	0	0	0	0
DB01328	approved	small molecule	cefonicid	J01DC06	mrcA,ftsI,mrcB,dacB,mrdA,ALB	0	0	0	0	0
DB01329	approved	small molecule	cefoperazone	J01DD12	ftsI,mrcB,mrdA,mrcA,ponB,dacC,mrcA,dacA,dacB,ALB,SLC22A6,SLC22A8,SLC22A11,SLC22A7	0	0	0	0	0
DB01332	approved	small molecule	ceftizoxime	J01DD07	mecA,mrcA,mrcB,ftsI,SLC15A1	0	0	0	0	0
DB01333	approved	small molecule	cefradine	J01DB09	mrcA,CYP3A4,SLC22A5,SLC15A1,SLC15A2,SLC22A6	0	0	0	0	0
DB01337	approved	small molecule	pancuronium	M03AC01	CHRNA2,CHRM2,CHRM3,BCHE,SLC22A1,SLC22A2	0	0	0	0	0
DB01346	approved	small molecule	quinidine barbiturate		GABRA1,GABRA2,SCN5A,KCNK1,GRIA2	0	0	0	0	0
DB01351	approved, illicit	small molecule	amobarbital	N05CA02	GABRA1,GABRA2,GABRA3,GABRA4,GABRA5,GABRA6,CHRNA4,CHRNA7,GRIA2,GRIK2,CYP2A6	0	1	0	1	0
DB01352	approved, illicit	small molecule	aprobarbital	N05CA05	GABRA1,GABRA2,GABRA3,GABRA4,GABRA5,GABRA6,CHRNA4,CHRNA7,GRIA2,GRIK2	0	0	0	1	0
DB01353	approved, illicit	small molecule	butethal	N05CA03	GABRA1,GABRA2,GABRA3,GABRA4,GABRA5,GABRA6,CHRNA4,CHRNA7,GRIA2,GRIK2	0	0	0	0	0
DB01354	approved	small molecule	heptabarbital	N05CA11	GABRA1,GABRA2,GABRA3,GABRA4,GABRA5,GABRA6,CHRNA4,CHRNA7,GRIA2,GRIK2	0	0	0	1	0
DB01355	approved	small molecule	hexobarbital	N01AF02,N05CA16	GABRA1,GABRA2,GABRA3,GABRA4,GABRA5,GABRA6,CHRNA4,CHRNA7,GRIA2,GRIK2,CYP2C19,CYP2C9,PTGS1,CYP2E1,CYP1A2,CYP3A4	0	0	0	1	0
DB01359	approved, investigational	small molecule	penbutolol	C07AA23	ADRB1,ADRB2,HTR1A,HTR1B,ORM1	0	0	0	0	0
DB01361	approved	small molecule	troleandomycin	J01FA08	rpmF,rplD,CYP2C19,CYP3A5,CYP2C9,CYP3A43,CYP2A6,CYP2C18,CYP2C8,CYP3A4,ABCB1	0	0	0	0	0
DB01363	approved, nutraceutical, withdrawn	small molecule	ephedra		SLC6A3,SLC6A2,ADRA2A,ADRA2B,ADRA2C,MAOA,MAOB,ADRB1,ADRB2,ADRB3,SLC6A4,SLC18A2,SLC18A1	0	0	1	1	0
DB01364	approved	small molecule	ephedrine	C01CA26,R01AA03,R01AB05,R03CA02,S01FB02	SLC6A2,ADRA1A,SLC18A2,ACHE,BCHE	0	0	0	1	0
DB01365	approved	small molecule	mephentermine	C01CA11	ADRA1A,ADRA1B,ADRA1D,ADRA2A,ADRA2B,ADRA2C,ADRB1,ADRB2,ADRB3	0	0	0	0	0
DB01373	nutraceutical	small molecule	calcium		CACNA1C,ATP2C1,TNNC2,TNNC1,SPTBN1,S100B,CAST,COMP,CALM1	0	0	0	0	0
DB01381	approved, nutraceutical	small molecule	ginkgo biloba	N06DX02	SLC6A2,PLA2G2A,GLRA1,GABRA1,GABRB2,GABRG2,CYP2C9	0	0	0	1	0
DB01388	withdrawn	small molecule	mibefradil		CACNA1G,CACNA1H,CACNA1C,CACNA1D,CACNA1F,CACNA1I,CACNA1S,CACNB1,CACNB2,CACNB3,CACNB4,CYP3A4,CYP1A2,CYP2D6,CYP3A5,CYP3A7,CYP11B1,CYP11B2,CYP1A1,ABCB1	0	0	1	1	0
DB01390	approved	small molecule	sodium bicarbonate	B05CB04,B05XA02	SLC4A4,SLC4A7,SLC4A8,SLC4A5,SLC4A10	0	0	0	0	0
DB01392	approved	small molecule	yohimbine	G04BE04	ADRA2A,ADRA2B,ADRA2C,HTR1A,HTR1B,HTR1D,DRD2,DRD3,HTR2A,HTR2C,KCNJ1,KCNJ10,KCNJ11,KCNJ12,KCNJ14,KCNJ15,KCNJ8,HTR2B,CYP2D6,CYP3A4	0	0	0	0	0
DB01393	approved	small molecule	bezafibrate	C10AB02	PPARA,PPARD,PPARG,CYP1A1,CYP2C8,CYP3A4,SLCO1B1	0	0	0	0	0
DB01394	approved	small molecule	colchicine	M04AC01	TUBB1,TUBB,CYP3A4,CYP2B6,CYP2C8,CYP2C9,CYP2E1,ABCB4,SLC22A3,ABCB1,ABCC1	0	0	0	0	0
DB01395	approved	small molecule	drospirenone		PGR,NR3C2,AR,PTGS2,BCHE	1	0	0	0	0
DB01396	approved	small molecule	digitoxin	C01AA04	ATP1A1,CYP3A4,CYP11A1,ALB,SLCO1A2,SLCO4C1,ABCB1	0	0	0	0	0
DB01403	approved	small molecule	methotrimeprazine	N05AA02	DRD2,DRD1,DRD5,DRD3,DRD4,HTR2A,HTR2C,HRH1,CHRM1,CHRM2,CHRM3,CHRM4,CHRM5,ADRA1A,ADRA1B,ADRA1D,ADRA2A,ADRA2B,ADRA2C,CYP2D6,CYP2E1,CYP1A2	0	0	0	0	0
DB01406	approved	small molecule	danazol	G03XA01	ESR1,AR,PGR,GNRHR,GNRHR2,CCL2,CYP19A1,CYP3A4,SHBG	0	0	0	0	0
DB01407	approved	small molecule	clenbuterol	R03AC14,R03CC13	ADRB2,ADRB1,ADRB3,NGF,TNF,CYP1A1,CYP1A2	0	0	0	0	0
DB01409	approved	small molecule	tiotropium		CHRM3,CHRM1,CHRM2,CYP2D6,CYP3A4,SLC22A5,SLC22A4	0	0	0	0	0
DB01410	approved, investigational	small molecule	ciclesonide	R01AD13,R03BA08	NR3C1,CYP3A4,CYP2D6,CES1,SERPINA6	0	0	0	0	0
DB01411	approved	small molecule	pranlukast	R03DC02	CYSLTR1,TNF,IL5,RNASE3,NFKB1,MUC2,CYP3A4,CYP2C9,ABCC2	0	0	0	0	0
DB01412	approved	small molecule	theobromine	C03BD01,R03DA07	ADORA1,ADORA2A,PDE4B,CYP1A2,CYP2E1	0	0	0	0	0
DB01413	approved	small molecule	cefepime	J01DE01	mrdA,ftsI,pbpB,pbpA,SLC22A5,SLC15A1,SLC15A2	0	0	0	0	0
DB01415	approved	small molecule	ceftibuten	J01DD14	ftsI,mrcA,mrcB,mrdA,SLC15A1,SLC15A2	0	0	0	0	0
DB01418	approved	small molecule	acenocoumarol	B01AA07	VKORC1,CYP2C9,CYP1A2,CYP2C19,CYP3A4,ALB,ORM1	0	0	0	0	0
DB01424	approved, withdrawn	small molecule	aminophenazone	N02BB03	CYP2C19,CYP1A2,CYP2C8,CYP2C9,CYP2D6,CYP3A4,CYP2C18,CYP17A1,CYP3A7,SLC22A6	0	0	1	1	0
DB01435	approved	small molecule	antipyrine	N02BB01,S02DA03	PTGS2,PTGS1,CYP2C8,CYP2C9,CYP1A2,CYP2C19,CYP3A4,CYP2A6,CYP2B6,CYP2C18,CYP2D6,CYP2E1,SLC22A6	0	0	0	0	0
DB01437	approved, illicit	small molecule	glutethimide	N05CE01	GABRA1,GABRA1,GABRA2,GABRA3,GABRA4,GABRA5,GABRA6,GABRB1,GABRB2,GABRB3,GABRD,GABRE,GABRG1,GABRG2,GABRG3,GABRP,GABRQ,CYP11A1,CYP2D6	0	0	0	1	0
DB01440	approved, illicit	small molecule	gamma hydroxybutyric acid		SLC52A2,GABRB1,SLC16A7,SLC16A1,SLC16A3	0	0	0	0	0
DB01442	experimental, illicit	small molecule	mmda		HTR2A,SLC6A3,SLC6A4,SLC6A2,SLC18A2,SLC18A1,MAOA,MAOB	0	0	0	0	0
DB01454	experimental, illicit	small molecule	3,4-methylenedioxymethamphetamine		SLC6A4,SLC18A2,SLC6A3,HTR2A,HTR2B,HTR2C,SLC6A2,SLC6A2,SLC6A3,SLC6A4	0	0	0	0	0
DB01466	approved, illicit	small molecule	ethylmorphine	R05DA01,S01XA06	OPRM1,CYP2D6,POR,CYP2B6,CYP3A4,CYP3A7	0	0	0	0	0
DB01472	experimental, illicit	small molecule	4-methoxyamphetamine		SLC6A3,SLC6A4,SLC18A2,ADRA1A,ADRA2A,MAOA,MAOB,CYP2D6	0	0	0	0	0
DB01483	illicit	small molecule	barbital		GABRA1,GABRA2,GABRA3,GABRA4,GABRA5,GABRA6,CHRNA4,CHRNA7,GRIA2,GRIK2	0	0	0	1	0
DB01496	experimental, illicit	small molecule	barbituric acid derivative		GABRA1,GABRA2,GABRA3,GABRA4,GABRA5,GABRA6,CHRNA4,CHRNA7,GRIA2,GRIK2	0	0	0	0	0
DB01497	illicit	small molecule	etorphine		OPRM1,OPRD1,OPRK1,OPRL1,TRIM13,POMC	0	0	0	0	0
DB01520	experimental, illicit	small molecule	tenocyclidine		GRIN3A,GRIN3B,GRIN2A,GRIN2C,GRIN2B,GRIN2D,CHRFAM7A	0	0	0	0	0
DB01544	approved, illicit	small molecule	flunitrazepam	N05CD03	TSPO,GABRA2,GABRA4,GABRA5,GABRA6,GABRA3,CYP2C19,UGT2B7,CYP1A2,CYP2A6,CYP2B6,CYP2C9,CYP3A4,CYP2E1,UGT1A1,UGT1A3	0	0	0	0	0
DB01558	approved, illicit	small molecule	bromazepam	N05BA08	GABRA1,GABRA2,GABRA3,GABRA4,GABRA5,GABRA6,GABRB1,GABRB2,GABRB3,GABRG1,GABRG2,GABRG3,GABRD,GABRE,GABRP,GABRR1,GABRR2,GABRR3,GABRQ,CYP3A4,CYP1A2,CYP2C19,CYP2E1	0	0	0	0	0
DB01559	approved, illicit	small molecule	clotiazepam	N05BA21	GABRA1,GABRA2,GABRA3,GABRA5,GABRG1,GABRG2,GABRG3,GABRB1,GABRB2,GABRB3,GABRD,GABRE,GABRP,GABRR1,GABRR2,GABRR3,CYP2B6,CYP2C18,CYP2C19,CYP3A4	0	0	0	0	0
DB01565	experimental, illicit	small molecule	dihydromorphine		OPRM1,OPRD1,OPRK1,TRIM13,POMC	0	0	0	0	0
DB01567	approved, illicit	small molecule	fludiazepam	N05BA17	GABRA1,GABRA2,GABRA3,GABRA5,GABRG1,GABRG2,GABRG3,GABRB1,GABRB2,GABRB3,GABRD,GABRE,GABRP,GABRR1,GABRR2,GABRR3	0	0	0	0	0
DB01576	approved, illicit	small molecule	dextroamphetamine		SLC18A2,SLC6A2,SLC6A3,TAAR1,ADRA1A,ADRA1B,CYP2D6	0	0	0	0	0
DB01577	approved, illicit	small molecule	methamphetamine		SLC6A3,SLC6A4,SLC6A2,SLC18A2,SLC18A1,TAAR1,ADRA2A,ADRA2B,ADRA2C,MAOA,MAOB,CYP2D6,SLC22A3,SLC22A5	0	0	0	1	0
DB01583	approved	small molecule	liotrix		THRA,THRB,CYP2C8,TTR,SERPINA7,ALB,SLCO1A2,SLCO1B1,SLCO1B3,SLCO4C1,SLC10A1,SLCO1C1,SLCO4A1,SLC22A8,SLC16A2,SLC16A10,ABCB1	0	0	0	0	0
DB01586	approved, investigational	small molecule	ursodeoxycholic acid	A05AA02	AKR1C2,CYP2E1,ABCB11,SLCO1A2,ABCC2,ABCC4,SLC10A2,SLC10A1	0	0	0	0	0
DB01587	approved	small molecule	ketazolam	N05BA10	TSPO,GABRA1,GABRB1,GABRG1,GABRD,GABRE,CYP3A4,ALB,ABCB1	0	0	0	0	0
DB01588	approved, illicit	small molecule	prazepam	N05BA11	GABRA1,GABRA2,GABRA3,GABRA5,GABRG1,GABRG2,GABRG3,GABRB1,GABRB2,GABRB3,GABRD,GABRE,GABRP,GABRR1,GABRR2,GABRR3,GABRA1,GABRA2,GABRA3,GABRA4,GABRA5,GABRA6,GABRB1,GABRB2,GABRB3,GABRD,GABRE,GABRG1,GABRG2,GABRG3,GABRP,GABRQ,CYP3A4	0	0	0	0	0
DB01589	approved, illicit	small molecule	quazepam	N05CD10	GABRA1,GABRA2,GABRA3,GABRA5,GABRG1,GABRG2,GABRG3,GABRB1,GABRB3,GABRD,GABRE,GABRP,GABRR1,GABRR2,GABRR3,GABRA1,GABRA2,GABRA3,GABRA4,GABRA5,GABRA6,GABRB1,GABRB2,GABRB3,GABRD,GABRE,GABRG1,GABRG2,GABRG3,GABRP,GABRQ,CYP2C19,CYP2C9,CYP3A4	0	1	0	0	0
DB01591	approved	small molecule	solifenacin	G04BD08	CHRM3,CHRM1,CHRM2,CHRM4,CHRM5,CYP3A4	0	0	0	0	0
DB01594	approved	small molecule	cinolazepam	N05CD13	GABRA1,GABRA2,GABRA3,GABRA5,GABRG1,GABRG2,GABRG3,GABRB1,GABRB2,GABRB3,GABRD,GABRE,GABRP,GABRR1,GABRR2,GABRR3	0	0	0	0	0
DB01595	approved	small molecule	nitrazepam	N05CD02	GABRA1,GABRA2,GABRA3,GABRA4,GABRA5,GABRA6,GABRB1,GABRB2,GABRB3,GABRG1,GABRG2,GABRG3,GABRD,GABRE,GABRP,GABRR1,GABRR2,GABRR3,GABRQ,SCN1A,CYP3A4,CYP2E1,ABCB1	0	0	0	0	0
DB01601	approved	small molecule	lopinavir		pol,CYP3A4,CYP2D6,CYP2C19,CYP1A2,CYP2B6,CYP2C9,ABCB1	0	0	0	0	0
DB01614	approved	small molecule	acepromazine	N05AA04	DRD2,DRD1,HTR2A,HTR1A,ADRA1A,ADRA1B,ALB,SLC22A1	0	0	0	0	0
DB01621	approved	small molecule	pipotiazine	N05AC04	DRD2,DRD1,HTR2A,HTR1A,CYP3A4,CYP2D6,CYP1A2,CYP2C19,ALB,SLC22A1	0	0	0	0	0
DB01622	approved	small molecule	thioproperazine	N05AB08	DRD2,DRD1,HTR2A,HTR1A,ADRA1A,ADRA1B,ALB,SLC22A1	0	0	0	0	0
DB01623	approved	small molecule	thiothixene	N05AF04	DRD2,DRD1,HTR2A,CYP1A2,CYP2D6,ALB,SLC22A1	0	1	0	0	0
DB01624	approved, investigational	small molecule	zuclopenthixol	N05AF05	DRD1,DRD5,DRD2,ADRA1A,ADRA2A,HTR2A,HRH1,CYP2D6	0	0	0	0	0
DB01628	approved, investigational	small molecule	etoricoxib	M01AH05	PTGS2,CYP3A4,CYP2C9,CYP2D6,CYP1A2,CYP2C19,CYP2E1	0	0	0	0	0
DB01632	experimental	small molecule	alpha-phosphoribosylpyrophosphoric acid		HGPRTase,APRT,trpD,HPRT1,pyrE,UCKL1	0	0	0	0	0
DB01643	experimental	small molecule	thymidine-5'-phosphate		tmk,DTYMK,TK,dnaQ,rmlA,TYMS,thyA,topA	0	0	0	0	0
DB01645	investigational	small molecule	genistein		ESR2,TOP2A,PTK2B,NCOA1,ESR1,NCOA2,CYP1A2,TTR,ABCB1,ABCC1,ABCG2	0	0	0	0	0
DB01660	experimental	small molecule	adenosine-5'-diphosphate monothiophosphate		recA,BST1,recA,recA,SYN1,BCKDK	0	0	0	0	0
DB01677	experimental	small molecule	fumarate		mdh,fccA,SO_0970,ME2,FAH	0	0	0	0	0
DB01694	experimental	small molecule	d-tartaric acid		dlgD,B3GAT1,TREM1,DDX6,TT_P0059,HIF1AN,serA,lpxA,ATP6V1C1,rmlC,VC_0232,phnA,SP_1951	0	0	0	0	0
DB01698	experimental	small molecule	rutin		AKR1C3,CYP2C8,CYP2C9,CYP2D6,CYP3A4	0	0	0	0	0
DB01708	nutraceutical	small molecule	dehydroepiandrosterone	A14AA07	ksi,SULT2A1,choB,HSD17B1,SULT2B1,PPARA,ESR1,SIGMAR1,ESR2,NR1I2,NR1I3,GABRA1,GABRA2,GABRA3,GABRA4,GABRA5,GABRA6,GABRB1,GABRB2,GABRB3,GABRD,GABRE,GABRG1,GABRG2,GABRG3,GABRP,GABRQ,GRIN1,GRIN2A,GRIN2B,GRIN2C,GRIN2D,GRIN3A,GRIN3B,CYP3A4,CYP3A7	0	0	0	1	0
DB01717	experimental	small molecule	bis(adenosine)-5'-pentaphosphate		adk,adk,AK2,AK8,adk,AK1	0	0	0	0	0
DB01727	experimental	small molecule	isocitric acid		icd,icd,ACO2,IDH2,IDH1,prpB	0	0	0	0	0
DB01752	experimental	small molecule	s-adenosyl-l-homocysteine		hemK,PAPS,cbiF,PCMT1,PNMT,cmaA2,rsrIM,TM_0488,PRMT3,HNMT,rsmH,ermC',TRDMT1,GNMT,trmL,pvuIIM,DAM,pcaA,PRMT1,cysG,hhaIM,SETD7,trmD,mmaA2,DPH5,rdmB,trmD,cobA,TTHA0667,cheR,taqIM,pcm,COMTD1,dnrK,GAMT,HNMT	0	0	0	0	0
DB01762	experimental	small molecule	acetoacetic acid		FAH,SLC16A7,SLC16A1,SLC16A3,SLC5A8	0	0	0	0	0
DB01769	experimental	small molecule	double oxidized cysteine		PTPN1,PREP,CDK2deltaT,PARK7,def,def,sucP,GK2698,CRYBB1,aglA,thiM,CDC25B	0	0	0	0	0
DB01812	experimental	small molecule	adenosine-3'-5'-diphosphate		HS3ST1,SULT2B1,RNASE2,SULT1A1,HS3ST3A1,RNASE1,SULT2A1,SULT1E1,NDST1,acpS,SULT1B1,topA	0	0	0	0	0
DB01819	experimental	small molecule	phosphoenolpyruvate		aroG,kdsA,ENO3,synC,PCK1,kdsA,aroF,SLCO2A1	0	0	0	0	0
DB01839	experimental	small molecule	1,2-propanediol		F13A1,linB,cs1,fucO,dhaB1	0	0	0	0	0
DB01863	experimental	small molecule	inositol 1,3,4,5-tetrakisphosphate		AKT1,PLEKHA4,BTK,DAPP1,ITPKA,CYTH2,CYTH3,PDPK1	0	0	0	0	0
DB01873	experimental, investigational	small molecule	epothilone d		TUBA3C,TUBB,TUBB1,TUBB2C,TUBB4,TUBA4A,TUBB3,TUBA1C,TUBA8,TUBA1B,TUBA1A	0	0	0	0	0
DB01892	nutraceutical	small molecule	hyperforin		PTGS1,NR1I2,ALOX5,ABCC2,SLCO1B1	0	0	0	0	0
DB01915	experimental	small molecule	s-hydroxycysteine		C3,azu,GSTP1,ACAT2,GSTA1,PMP2,phbA,apr	0	0	0	0	0
DB01942	experimental	small molecule	formic acid		HMOX1,RNASE1,pyrD,dhlB,bla,katA,ffh,mgsA,CTBP1,pgl,citE,CASK,gmk,buk2,A2LD1,PVALB,ACYP2,BC_2969,astA,yvyI,NOS1,TM_1223,ycdX,phzD1,oxdC,actIII,GPHN,BC_1747,CYTH2,gcdA,TM_0065,katA,TM_1070,GST,HGPRTase,glsA1,glsA1,moaE,TM_1131,fbpA,gyrB,ygbM,hemB,aroA,apr,FGF1,def,pabB,CA2,SLC16A3	0	0	0	0	0
DB01955	experimental	small molecule	1,4-butanediol		MAN1B1,PLA2G2A,PLA2G2E,rsuA,mepA	0	0	0	0	0
DB01972	experimental	small molecule	guanosine-5'-monophosphate		GUK1,pleD,43,DLG4,GMPR,PDE5A,HINT1,ATIC,pyrR,purF,TGM3,gpt,cobU,purF	0	0	0	0	0
DB01992	nutraceutical	small molecule	coenzyme a		acs,DBI,frc,CRAT,caiB,pflB,glcB,mvaA,coaD,acpS,paiA,aacC1,lacA,HMGCR,fadR,KAT5,dapD,ACAT2,phbA,vatD,CS,fabH,frc,coaA,rimL,yvbK,aac(6')-Iy,BC_2038,HI_0827,fabH,mshD,KAT2A,BH0798,KAT2B,menB,cit,aac,aac(6')-Ii,sfp,PA3270,cysE,gltA,fcbC,glmU,aac	0	0	0	0	0
DB02007	experimental	small molecule	alpha-d-glucose-6-phosphate		HK1,algC,glvA,PYGM,otsA,glmS,bglT,GPI,AKR1B1	0	0	0	0	0
DB02010	experimental	small molecule	staurosporine		LCK,PIM1,ITK,SYK,MAPKAPK2,GSK3B,CSK,CDK2deltaT,PIK3CG,PDPK1,PRKCQ,ZAP70,ABCB1	0	0	0	0	0
DB02032	experimental	small molecule	1-(3-mercapto-2-methyl-propionyl)-pyrrolidine-2-carboxylic acid		ACE,blaFEZ-1,blaB1,cphA,VC_A1006	0	0	0	0	0
DB02052	experimental	small molecule	indirubin-3'-monoxime		CDK5,CDK1,GSK3B,CDK5R1,CDK2deltaT	0	0	0	0	0
DB02059	experimental	small molecule	adenosine-5-diphosphoribose		rfbG,EEF2,GAPDH,fucO,SIRT5,pobA,nudF,MT1739,nudE,ndx4,SIRT3	0	0	0	0	0
DB02078	experimental	small molecule	1-methoxy-2-[2-(2-methoxy-ethoxy]-ethane		lolB,PFN2,lolB,AGR_C_2535,cysE,FYN,PPIF,BCE_3424,SPO2066,tkt2	0	0	0	0	0
DB02123	experimental	small molecule	glycochenodeoxycholic acid		hdhA,ABCB11,SLCO1A2,SLC10A2,SLC10A1	0	0	0	0	0
DB02142	experimental	small molecule	pyridoxamine-5'-phosphate		alr,hemL,hisC,dat,aspC,gabT,CCBL1,hisC,BCAT2,arnB	0	0	0	0	0
DB02153	experimental	small molecule	3-sulfinoalanine		pdxY,blm,PAPOLA,aroH,GSR,luxS,clcD,dmsA,PRDX2,def,mvaS,tthHB8IM,FABP4	0	0	0	0	0
DB02175	experimental	small molecule	malonic acid		rsbQ,panD,SRC,SCO1207,SNRPA,rimL	0	0	0	0	0
DB02196	experimental	small molecule	uridine-diphosphate-n-acetylgalactosamine		EXTL2,UAP1,GALE,wecB,ABO,murG	0	0	0	0	0
DB02210	experimental	small molecule	hexane-1,6-diol		NE0143,HRAS,NR3C1,E,ruvB,PLA2G1B	0	0	0	0	0
DB02262	experimental	small molecule	orotic acid		pyrDA,pyrE,DHODH,pyrD,pyrC	0	0	0	0	0
DB02266	experimental	small molecule	flufenamic acid		PTGS2,PTGS1,AKR1C3,AR,TTR,SLC22A6	0	0	0	0	0
DB02338	experimental	small molecule	nadph dihydro-nicotinamide-adenine-dinucleotidephosphate		TXNRD1,zwf,PTR1,gfo,DPYD,AASS	0	0	0	0	0
DB02342	investigational	small molecule	2-methoxyestradiol		HIF1A,COMT,CYP1A1,CYP1B1,CYP19A1,SHBG	0	0	0	0	0
DB02377	experimental	small molecule	guanine		TM_1596,PNP,xapA,gpt,GCH1	0	0	0	0	0
DB02379	experimental	small molecule	beta-d-glucose		PYGM,xylA,GCK,fhuA,galM,celA1,glk,lecB,BH0236,TM_0024,xynA,celB,cenC,celS,mglB,GLT6D1,GNPDA1,spoII,NUDT9,SMARCA5,amyA,entB,AMY1A,malP,stxB,NCAN,gdhB,amy,celB,cslB,aspA,cel5A,LCTL,ams,AMY2A,moxC,Acel_0614,mglB,eco,mutY,KRTAP5-2,SIGLEC1,nplT,xynA,lamB,tvaI,lamB,MB,LGALS2,PTGS1,HK1,treZ,amyE,ppgmk,cex,budC,cgt,celCCG,LGALS7,ctxB,KRTAP5-3,dmsA,celC307,AMY2B,engF,tvaII,celD,botB,stxB2e,tetX,xylA,amyP,…	0	0	0	0	0
DB02431	experimental	small molecule	cytidine-5'-triphosphate		cca,rfbF,ispD,tagD,ispD,kpsU,UCK2,coaBC	0	0	0	0	0
DB02452	experimental	small molecule	thymidine-5'-triphosphate		rmlA,rmlA2,4,rmlA,TK2,tdk,nrdE,TK1,NRDD,tmk	0	0	0	0	0
DB02467	experimental	small molecule	s-oxymethionine		celA1,RAB5A,celB,mauC,thyA	0	0	0	0	0
DB02482	experimental	small molecule	phosphonothreonine		RHO,PRKACA,PRKACB,CDK7,cobD,S100A11,MAPK12,PRKCQ,AURKA,MAPK1	0	0	0	0	0
DB02494	experimental	small molecule	alpha-hydroxy-beta-phenyl-propionic acid		pdh,RPL10L,RPL13A,RPL23,RPL15,RPL19,RPL23A,RSL24D1,RPL26L1,RPL8,RPL37,RPL3,RPL11,NHP2L1,CPA1	0	0	0	0	0
DB02506	experimental	small molecule	2,6,8-trimethyl-3-amino-9-benzyl-9-methoxynonanoic acid		PPP1CA,PPP2R1A,PPP2CA,PPP2R5C,PPP2R2A	0	0	0	0	0
DB02527	experimental	small molecule	cyclic adenosine monophosphate		HCN2,PRKAR1A,PRKAR2B,cyaB2,mll3241,crp,ABCC4,ABCC5,ABCC11,SLC22A6,SLC22A8,SLC22A7	0	0	0	0	0
DB02546	approved, investigational	small molecule	vorinostat	L01XX38	HDAC1,HDAC2,HDAC3,HDAC6,HDAC8,acuC1	0	0	0	0	1
DB02552	experimental	small molecule	geranyl diphosphate		ispF,ispDF,ispF,FDPS,GGPS1,Rv1086,uppS	0	0	0	0	0
DB02580	experimental	small molecule	1-(2-methoxy-ethoxy)-2-{2-[2-(2-methoxy-ethoxy]-ethoxy}-ethane		PFN2,bpuJIR,nir,SAV4671,GSU1007,AFE_1514,gpmA,purA,SYNAS_17590,RUMGNA_03254,VP2116	0	0	0	0	0
DB02596	experimental	small molecule	alpha,beta-methyleneadenosine-5'-triphosphate		folK,panC,nadE,NMNAT3,cyaC,lipJ,carA	0	0	0	0	0
DB02659	approved	small molecule	cholic acid		FECH,ADH1C,ESRRG,FABP6,COX4I1,MT-CO1,MT-CO2,MT-CO3,COX5A,COX5B,COX6C,COX7B,COX7C,COX8A,COX6A2,COX6B1,COX7A1,PLA2G1B,CES1,DKFZp686P18130,cbh,FABP1,ABCB11,ABCB1,ABCC1,SLCO1A2,SLC10A2,ABCC2,SLCO1B1,ABCC3,ABCC4,SLC10A1,SLC22A8,SLC22A7,SLCO1B3	0	0	0	0	0
DB02701	experimental	small molecule	nicotinamide		eta,LDHA,PARP1,SIRT5,BST1,CYP2D6,CYP2E1,CYP3A4	0	0	0	0	0
DB02703	approved	small molecule	fusidic acid	D06AX01,D09AA02,J01XC01,S01AA13	fusA,cat,cat3,ABCB11,ABCC2	0	0	0	0	0
DB02709	experimental, investigational	small molecule	resveratrol		NQO2,CSNK2A1,PTGS1,PTGS2,CYP1A2,CYP1A1,CYP1B1,CYP3A4,TTR	0	0	0	0	0
DB02726	experimental	small molecule	2-phosphoglycolic acid		nagB,pfkA,TPI1,PKM2,tpiA,mgsA,ENO2,tpiA,aroG,PKLR,TPI,yniC,ENO3	0	0	0	0	0
DB02733	experimental	small molecule	purvalanol		CRK2,CDK4,MAPK1,MAPK3,CDK2deltaT,SRPK2	0	0	0	0	0
DB02740	experimental	small molecule	3-indolebutyric acid		tyrB,B2M,TRAC,TRBC1,HLA-A	0	0	0	0	0
DB02761	experimental	small molecule	s-mercaptocysteine		MST,c-des,sseA,hcp,TST,TTHA1028,glpE,hcp,sufS	0	0	0	0	0
DB02772	experimental	small molecule	sucrose		bgl3,ams,blaCTX-M-9a,blaCTX-M-14,hmuO,ATOX1,C22orf28,scrY,sacB,blaCTX-M-27,algD,ACTA1,ampC,nos,LYZ,maf	0	0	0	0	0
DB02843	experimental	small molecule	alpha-d-glucose-1-phosphate		algC,PYGM,rmlA,malP,agp	0	0	0	0	0
DB02901	experimental, illicit	small molecule	dihydrotestosterone		HSD17B1,AR,CYP11A1,CYP17A1,CYP19A1,SHBG,ABCB1	0	0	0	0	0
DB02930	experimental	small molecule	phosphothiophosphoric acid-adenylate ester		purT,cag-alfa,PFKFB1,PMS2,dnaX,pknB,recQ	0	0	0	0	0
DB03010	experimental, investigational	small molecule	epothilone b		TUBA3C,TUBB,TUBB1,TUBB2C,TUBB4,TUBA4A,TUBB3,TUBA1C,TUBA8,TUBA1B,TUBA1A	0	0	0	0	0
DB03026	experimental	small molecule	phosphoglycolohydroxamic acid		TPI1,mgsA,rhaD,fucA,kbaY,fbaA	0	0	0	0	0
DB03059	experimental	small molecule	acetoacetyl-coenzyme a		menB,mvaS,mvaS,HADH,phbA,ACADS,ECHS1	0	0	0	0	0
DB03088	experimental	small molecule	pyroglutamic acid		VEGFA,AMY2A,IGLC1,TFF2,cycA,ADAM28,nir,KRTAP5-2,HCRT,CCL8,AMY2B,ANG,cslB,AMY1A,AMY2A	0	0	0	0	0
DB03127	experimental	small molecule	benzamidine		KLK6,PRSS2,PRSS3,ATOX1,DCI,sprT,ST14,PLAU,PRSS1,CSNK2A1	0	0	0	0	0
DB03144	experimental	small molecule	n-omega-hydroxy-l-arginine		NOS3,nos,NOS2,ARG1,NOS1	0	0	0	0	0
DB03147	approved	small molecule	flavin adenine dinucleotide		glf,hmp,thiO,POR,GCDH,ACADM,DAO,putA,phr,MAOA,ACADS,IL4I1,fadH,xecC,pobA,NOS1,NQO1,pobA,SO_0970,ERO1LB,GSR,fprA,CYB5R3,choA,thyX,pox5,trxB,gor,metF,soxA,TPR,NQO2,IVD,XDH,choB,dmg,npr,DPYD,petH,dld,cysJ,TXNRD1,fpr,ACAD8,AIFM1,bphA4,PSPTO1126,phrB,phr,nadB,cry,DLD,ifcA,CYB5R1,MAOB,FDXR,ACOX1,murB,GFER,murB,hmp,pheA2,metF,camA,lpdA,glf,abfD,pchF,ahpF,m-6,GR2,pamO,benC,TT_C0779,fkbI,lpdV,lpd,ahpF,pet…	0	0	0	0	0
DB03152	experimental	small molecule	b-2-octylglucoside		polA,aqpZ,TGM3,puhA,aqpZ,petB,petA,petC,RHO	0	0	0	0	0
DB03206	experimental	small molecule	1-deoxynojirimycin		MAN1B1,MSDC,xylA,bglA,cgt	0	0	0	0	0
DB03222	experimental	small molecule	2'-deoxyadenosine 5'-triphosphate		4,POLB,nrdE,NRDD,recA,recA	0	0	0	0	0
DB03247	experimental	small molecule	riboflavin monophosphate		tmd,roo,TM_0857,morB,frp,RPS6KA4,phzG,HAO2,DR_A0214,fldA,fni,nox,DvMF_2023,BC_1844,POR,PPCDC,phzG,gltS,pdxH,nfnB,aroC,fadH,pyrDA,BLVRB,HAO1,PNPO,RFK,nfsA,NOS1,pyrD,DPYD,DHODH,onr,azoR,epiD,azoR,aroC,isiB,DVU_2680,isiB,SMU_260,moxC,TM_0096,nrdI,pad1,mdlB,azr,fldA,SGK1,nfnB,fprA,fni,POR	0	0	0	0	0
DB03256	experimental	small molecule	5-formyl-5,6,7,8-tetrahydrofolate		dmg,glyA,gcvT,arnA,FTCD	0	0	0	0	0
DB03280	experimental	small molecule	p1-(5'-adenosyl)p5-(5'-thymidyl)pentaphosphate		DTYMK,tmk,TK,TK,tmk	0	0	0	0	0
DB03297	experimental	small molecule	benzylsulfinic acid		HPN,estB,rsbQ,SOD2,CMA1,apr	0	0	0	0	0
DB03309	experimental	small molecule	n-cyclohexyltaurine		P/V,nirS,EN2,rph,SULT2B1	0	0	0	0	0
DB03317	experimental	small molecule	heme c		nrfA,cycA,psbV,cycM,nirM,cyd,Ddes_2150,glbN,CYP2C9,Ddes_2038,ccpA,DvMF_2499,cycP,cytc3,nirS,hmcA,cycA,qheDH,nirS,cc4,CYCS	0	0	0	0	0
DB03323	experimental	small molecule	maltose		AMY2B,aglA,malE,treZ,malE,spoII,amyM,malP	0	0	0	0	0
DB03345	experimental	small molecule	beta-mercaptoethanol		E,GLO1,PNPO,gfo,SERPINA1,LGALS1,ninB,SCMH1,pdxH,HP_0602	0	0	0	0	0
DB03374	experimental	small molecule	3,5-diiodotyrosine		PKIA,PRKACA,BH0413,PRSS1,nikA,IYD	0	0	0	0	0
DB03382	experimental	small molecule	s-oxy cysteine		panD,PREP,ppx,Rv2991,tpx,SOD1,npr	0	0	0	0	0
DB03389	experimental	small molecule	alpha-d-xylopyranose		cslB,cslA,cex,galM,BH2105,xynA,xlnA,xlnA,xyl,LCT,xynC,spoII	0	0	0	0	0
DB03397	experimental	small molecule	uridine-diphosphate-n-acetylglucosamine		glmU,UAP1,murA,GALE,glmU,galE,EXTL2,MGAT1	0	0	0	0	0
DB03401	experimental	small molecule	d-myo-inositol-1,4,5-triphosphate		CYTH2,EPN1,PLCD1,RDX,SPTBN1,ITPR1,ITPKA	0	0	0	0	0
DB03403	experimental	small molecule	cytidine-5'-monophosphate		ispDF,CMPK1,ispF,cmk,UCK2,kpsU,ispF,cst-II,coaBC	0	0	0	0	0
DB03413	experimental	small molecule	deoxyuridine-5'-diphosphate		DUT,dut,dut,Tcdut,pol	0	0	0	0	0
DB03419	experimental	small molecule	uracil		rsuA,UL2,ung,DPYD,UCKL1,udg,pdp	0	0	0	0	0
DB03435	experimental	small molecule	uridine-5'-diphosphate		EXTL2,GLT6D1,spsA,CMPK1,bgt,galE,B3GAT3,wecB,ABO,galT,pol,B3GAT1,otsA,galE,GYG1	0	0	0	0	0
DB03461	experimental	small molecule	2'-monophosphoadenosine 5'-diphosphoribose		ADH1B,POR,aroE,adh,fcl,asd,fadH,ME1,pntB,fabG,icd,AKR1B1,zwf,AKR1C2,HSD17B1,NNT,HSD11B1,SPR,PTR1,DCXR,IDH1,folA,AKR1C1,NOS1,G6PD,DHFR,hldD,MTHFD1,AKR1C3,BLVRB,icd,CRYZ,DHRS11,HMGCR,MDH1,ydhF,ptr2,HSD17B8,AKR1A1,actIII,DECR1,TM_0441,Tb11.02.2310,yhdN,petH,mtdA,TM_0920,FDXR,petH,dkgA,iolS,gapN,PTGR1,cysJ,AKR1B10,TM_0820,aldH,DHRS4L1,TM_1009	0	0	0	0	0
DB03467	experimental	small molecule	naringenin		ttgR,SLCO2B1,ABCB1,ABCC1,ABCG2	0	0	0	0	0
DB03496	experimental, investigational	small molecule	flavopiridol		CDK2deltaT,CDK5,CDK9,CDK1,CDK6,EGFR,CDK4,CDK8,CDK7,PYGM,ABCG2	0	0	0	0	0
DB03499	experimental	small molecule	malate ion		kaiB,fumC,glcB,ME2,CS,synC	0	0	0	0	0
DB03541	experimental	small molecule	10-propargyl-5,8-dideazafolic acid		THYA,thyA,thyA,NQO2,TYMS,DHRS4L1	0	0	0	0	0
DB03553	experimental	small molecule	glutaric acid		aspC,gadA,ilvE,SLC22A6,SLC22A8,SLC22A11,SLC22A7	0	0	0	0	0
DB03566	experimental	small molecule	spermidine		potD,TXNRD1,aacC1,SLC22A4,SLC22A1	0	0	0	0	0
DB03600	experimental	small molecule	decanoic acid		fabB,FURIN,pab,GLTP,lipB,tcp14,ALB	0	0	0	0	0
DB03615	experimental	small molecule	ribostamycin		aac(6')-Iy,aac,P4HB,rpsL,aac	0	0	0	0	0
DB03661	experimental	small molecule	cysteinesulfonic acid		blaVIM-2,TM_1080,CTSL1,prx,def,GLIPR2,TM_1158,def,fabH,PTPN1,luxS,1,CDC25B	0	0	0	0	0
DB03685	experimental	small molecule	uridine-5'-monophosphate		rsuA,UCKL1,galT,thyA,GLT6D1,LSM6,upp,B4GALT1,ISG20,pyrF,pyrR,upp,arnA	0	0	0	0	0
DB03721	experimental	small molecule	o-sialic acid		L5,SIGLEC1,AZGP1,L5,CES1,tetX,ctxB,botB,SELP,MBL2,SELE,REG1A,entB,NA,HN,CES1	0	0	0	0	0
DB03740	experimental	small molecule	2-(acetylamino)-2-deoxy-a-d-glucopyranose		lecB,env,IGHG1,ACE,ACHE,GBA,pdaA,SIGLEC7,HN	0	0	0	0	0
DB03754	experimental	small molecule	tris(hydroxymethyl)aminomethane		lytA,cc4,CANT1,nlpI,dps,HI_1317,NEIL1,ctxB,AMD1,bioB,VEGFA,pgl,DCN	0	0	0	0	0
DB03758	experimental	small molecule	radicicol		HSP90AB1,HSP90B1,DLAT,PDK3,phoQ	0	0	0	0	0
DB03766	experimental	small molecule	propanoic acid		cpo,GPHN,cumD,alr,FABP4	0	0	0	0	0
DB03783	withdrawn	small molecule	phenacetin		PTGS1,CYP1A2,CYP2D6,CYP1A1,CYP2A13,CYP2A6,CYP2C19,CYP2C9,CYP2E1,CYP3A4,SLC22A6	0	0	1	1	0
DB03793	experimental	small molecule	benzoic acid		oxyR,malT,pptA,DAO,HRSP12,clcA,RAB9A,cumD,cpo,nfnB,chqB,repA,PRDX5,eltB,cocE,SLCO2B1,SLC22A8,SLC16A1	0	0	0	0	0
DB03796	experimental	small molecule	palmitic acid		PAEP,HNF4G,CYP2C8,TRAPPC3,TM_1468,RHO,SEC14L2,PPT1,PMP2,LALBA,FABP4,FABP5,FABP3,FABP2,ALB,ABCB1	0	0	0	0	0
DB03800	experimental	small molecule	2'-deoxyuridylic acid		THYA,dut,thyA,thyA,TYMS,thyX,pol,dut	0	0	0	0	0
DB03801	experimental	small molecule	lysine nz-carboxylic acid		hyuA,bla,lhyD,iadA,bla,dadX,HP_0602,TM_0306,bla,murD,alr,murE,opd,fgs,pyrC,CDK2deltaT	0	0	0	0	0
DB03814	experimental	small molecule	2-(n-morpholino)-ethanesulfonic acid		ACHE,glmS,DFR1,nirK,HSD11B1,glmU,hcp,lysA,yicI,limA,manA,B4GALT1,ABL,dsbC,gapA,mdlB,nir,hslO,yebR,PP3533,QDPR,ASL,ymdB,ARL3,blaB,HI_1679,L3MBTL1,BCHE,rnz,PRDX6,mglB,pep,SFTPA1,aroG,SCO1207,IRGC,CMA1,GSTP1,BCHE	0	0	0	0	0
DB03880	experimental	small molecule	batimastat		MMP8,MMP12,MMP16,ADAM28,ADAMTS5	0	0	0	0	0
DB03884	experimental	small molecule	3-phenylpyruvic acid		pdh,HAO1,ipdC,CV_3270,bacB,pheA,SLC16A3	0	0	0	0	0
DB03900	experimental	small molecule	2-methyl-2-propanol		RNASE1,TPI1,METAP2,bphC,CALM1	0	0	0	0	0
DB03904	experimental	small molecule	urea		ARG1,CA2,CTNNB1,yedY,folA,SLC14A2,SLC14A1	0	0	0	0	0
DB03909	experimental	small molecule	adenosine-5'-[beta, gamma-methylene]triphosphate		fgs,cheA,murC,gntK,purT,INSR,ATP2A1,PDXK,PGK1,pknB,rbsK,STM4066,buk2,KIF1A	0	0	0	0	0
DB03929	experimental	small molecule	d-serine		GLRA1,GRIN1,SERPINB3,shp,SLC16A10,SLC6A14	0	0	0	0	0
DB03940	experimental	small molecule	oxamic acid		ldh,LDHA,LDHB,pflB,SLC16A3	0	0	0	0	0
DB03959	experimental	small molecule	n,o6-disulfo-glucosamine		FGF2,FGF1,HS3ST3A1,HGF,C3L,ANXA5	0	0	0	0	0
DB03963	experimental	small molecule	s-(dimethylarsenic)cysteine		TLR2,UL80,gag-pol,NOS3,COPG,XRCC4,msrA	0	0	0	0	0
DB03991	experimental	small molecule	2-deoxy-2,3-dehydro-n-acetyl-neuraminic acid		HN,nedA,NA,HN,NEU2	0	0	0	0	0
DB04074	experimental	small molecule	alpha-ketoisovalerate		panB,cefE,leuA,BCAT2,SLC16A7,SLC16A1,SLC16A3	0	0	0	0	0
DB04077	experimental	small molecule	glycerol		nrdB,mutY,TRDMT1,glpF,dctD,ADH1B,ITPR1,PAEP,NAGA,cc4,bfr,TGFBR2,argG,eno,ARF1,mexA,PAPSS1,hisD,mutL,HPGDS,celCCG,GSTP1,PLA2G2E,ISYNA1,CYP2E1,ABCB1	0	0	0	0	0
DB04083	experimental	small molecule	n'-pyridoxyl-lysine-5'-monophosphate		TM_1744,mdeA,metB,CCBL1,ODC1,bioA,PYGM,AGXT,aspC	0	0	0	0	0
DB04099	experimental	small molecule	deamido-nad+		nadE,NMNAT1,nadD,NMNAT3,nadE,nadE	0	0	0	0	0
DB04132	experimental	small molecule	s-hexylglutathione		GLO1,GSTM4,GSTP1,GST,GSTA1,GSTT2,GSTA1	0	0	0	0	0
DB04133	experimental	small molecule	degraded cephaloridine		blaZ,pbpA,SLC22A5,SLC22A6,SLC22A8,SLC22A11	0	0	0	0	0
DB04137	experimental	small molecule	guanosine-5'-triphosphate		RAB5A,engB,P2,UCKL1,HRAS,RND3,RHEB,folE,PFKFB1,A103R,ARF1,mobA,odcI,GLUD1,ADSSL1,RAP2A	0	0	0	0	0
DB04141	experimental	small molecule	2-hexyloxy-6-hydroxymethyl-tetrahydro-pyran-3,4,5-triol		ABO,CYC1,MT-CYB,UQCRC1,UQCRC2,UQCRH,UQCRQ,UQCRFS1,UQCRB,UQCR10,SDHA,SDHB,SDHD,ETFDH,SDHC	0	0	0	0	0
DB04147	experimental	small molecule	lauryl dimethylamine-n-oxide		fecA,fadL,crcA,MAOB,tesB,pufL,pufM,puhA,ctaDII,ctaC,pufC,puhA,pufL,pufM,puhA,DSTN,RHO,cycA,NFE2L1,shc,btuB,ceaC,fptA,PMP2,ompW,tonB,cirA,cia,CFL1,glpG,ompG,papC,nanC,puhA,pufL,pufM,porB,mll3241,amtB,pbp2,DHODH,traO,traF,traN,PFL_1329,MAOB	0	0	0	0	0
DB04216	experimental	small molecule	quercetin		HCK,PIK3CG,UGT3A1,ATP5A1,ATP5B,ATP5C1,PIM1,ttgR,HIBCH,fabZ,STK17B,CYP2C8,ABCC1,ABCC2,SLC16A7,SLCO2B1,ABCB1,SLC16A1,ABCG2	0	0	0	0	0
DB04224	experimental	small molecule	oleic acid		GLTP,PMP2,FABP7,FABP4,FABP3,FABP1,ALB,GC	0	0	0	0	0
DB04233	experimental	small molecule	(hydroxyethyloxy)tri(ethyloxy)octane		ompX,ompA,opmA,ompF,fadL,shc,btuB,CLPS,PNLIP,RHO,sll1541,ompG,ompW,hia,oprP,oprD,opdK,papC,ompC,tbuX,Pput_2883,PA4589,TT_C0834,estA	0	0	0	0	0
DB04272	nutraceutical	small molecule	citric acid	A09AB04	eda,mobA,fumC,pgl,nfnB,gag-pro-pol,IL4I1,MIF,CTDSP1,dxr,trpA,nedA,HGS,YPTB1668,ITEVIR,12,MDH2,purE,rplD,CPB1,PII,TM_0857,bfrA,sspA,cit,rtcA,LSM6,PLEKHA1,fbpA,TM_0570,nadD,nusB,C8G,nrdF,glnA1,gltA,Tb11.02.2310,ftsZ,APRT,ANG,rmlA,blm,BC_1747,UCK2,TNFSF13B,yfiH,BHMT,rpiA,trpS,guaA,AKR1B1,ITPA,CS,17,HS3ST3A1,TM_1436,PDE5A,pcaB,SRC,pdc,RNASE1,icd,GNMT,RNASE3,penP,SLCO2B1	0	0	0	0	0
DB04299	experimental	small molecule	maleic acid		GOT1,aspC,TPR,aspC,tyrB	0	0	0	0	0
DB04310	experimental	small molecule	2-[(formyl-hydroxy-amino)-methyl]-heptanoic acid [1-(2-hydroxymethyl-pyrrolidine-1-carbonyl)-2-methyl-propyl]-amide		def,def,def,def,def,def1,def2,def,def,PDF	0	0	0	0	0
DB04315	experimental	small molecule	guanosine-5'-diphosphate		ADSSL1,fusA,TUFM,der,nudD,engB,EIF2S3,GNAI1,ffh,GNAT1,tufB,RAB9A,NME1,RHEB,CDC42,tufA,ARF1,EEF2,relA,RAP2A,EFTUD1,ARL1,RAN,RAB7A,IRGC,GSPT1,RAB5A,HRAS,EEF1A1,RHOA,ARF4,TGM2,GMDS,RAB11A,RALA,purA,tuf,ARL5B,ftsZ,TGM3,rab6,RAB8B,ARF6,ARL3,NME2,gca,RAC1,rsgA,SAR1B,Adss,ARL5A	0	0	0	0	0
DB04343	experimental	small molecule	glyoxalate, glyoxylate		glcB,icl,glcB,Rv3853,SLC16A3	0	0	0	0	0
DB04348	experimental	small molecule	taurocholic acid		CEL,FABP6,ABCB11,ABCC1,SLCO1A2,SLC10A2,ABCC2,SLCO1B1,SLC22A1,ABCC3,ABCC4,ABCB1,SLC22A6,ABCC10,SLC22A8,SLCO4A1,ABCC11,SLCO1C1,SLCO3A1,ABCG2,SLCO2B1,SLC16A1,SLC10A1,OSTA,OSTB,SLCO1B3,SLC7A11	0	0	0	0	0
DB04355	experimental	small molecule	uridine-5'-monophosphate glucopyranosyl-monophosphateester		GYG1,GALE,otsA,rmlA,galE,bgt,GLT6D1	0	0	0	0	0
DB04395	experimental	small molecule	phosphoaminophosphonic acid-adenylate ester		hslU,EPHB2,trwB,CFTR,VCP,TRPM7,KIF1A,CCT3,TM_0588,SRPK2,MAPK12,clpB,epsE,phoQ,parE,GALK1,recA,RAD51,kdpB,GSK3B,DTYMK,cheA,IGF1R,PIM1,dhaK,coaA,HK1,purT,LCK,CSNK2A1,EPHA2,argG,MAPK10,metK,murC,envZ,gyrB,mutL,KIF2C,ITPKA,TOP2B,GSS,ispE,PFKFB4,aphA,DAPK1,arsA,ACTA1,argB	0	0	0	0	0
DB04398	experimental	small molecule	lactic acid		putA,DR_0842,SLC16A7,SLCO2B1,SLC16A1,SLC16A10,SLCO2A1,SLC16A3	0	0	0	0	0
DB04400	experimental	small molecule	7,8-dihydrobiopterin		TH,PCBD1,PAH,PTR1,NOS2,folB	0	0	0	0	0
DB04444	experimental	small molecule	tetrafluoroaluminate ion		argB,GNAI1,ATP2A1,GNAT1,CMPK1,MYH11,MYH14,recA,rbsK	0	0	0	0	0
DB04447	experimental	small molecule	1,4-dithiothreitol		paiA,acpS,hisD,aroE,LGALS1,CAMK2A,rpmA,ALDH1A1,ohr,pcaB,TRPM7,ugl,moaA,bca,MSRA,torD,AXIN1,PPIB,ams,thyA,TPI1,GSTZ1,HMGCR,prfA	0	0	0	0	0
DB04464	experimental	small molecule	n-formylmethionine		gshA,RNASE1,CLPP,RABGGTA,RABGGTB,pufC,puhA,pufL,pufM,SERPINC1,B2M,MT-ND1,HLA-B,narG,narH,narI,S100G,rub,COX4I1,MT-CO1,MT-CO2,MT-CO3,COX5A,COX5B,COX6C,COX7B,COX7C,COX8A,COX6A2,COX6B1,COX7A1,fmt,S100B,hld,UBC,atpH,ulaG,spg	0	0	0	0	0
DB04465	experimental	small molecule	lactose		GLT6D1,GLTP,entB,nedA,xlnA,lacZ,tetX	0	0	0	0	0
DB04485	experimental	small molecule	deoxythymidine		TK,TK2,rmlA,tsx,tmk,TK,udp,SLC22A1,SLC28A3	0	0	0	0	0
DB04493	experimental	small molecule	fructose-6-phosphate		FBP1,PFKFB1,pfkA,PFKFB4,GPI	0	0	0	0	0
DB04510	experimental	small molecule	3-phosphoglyceric acid		PGK1,pgk/tpi,TPI,gpmI,PGAM2,TPI1	0	0	0	0	0
DB04519	experimental	small molecule	caprylic acid		fabB,tesA,SLC22A6,SLC22A8,SLC22A11	0	0	0	0	0
DB04522	experimental	small molecule	phosphonoserine		PRKACA,spoIIAA,pilE1,phoA,SERPINB3,xynY,RHO,TAOK2,KCNC4,REG1A,SMAD2,glsA1,cysG,ptsH,CFTR,PDPK1,PIM1,PRKCQ,PYGL,algC,PYGM	0	0	0	0	0
DB04530	experimental	small molecule	s,s-(2-hydroxyethyl)thiocysteine		SERPINB5,rmlC,PDE1B,SNX3,licT,CYTH2,thyA,PDE4B,TYMS,PRKACA,PIM1,ARG1,lacZ,icd,malE,hemB	0	0	0	0	0
DB04552	approved	small molecule	niflumic acid	M01AX02,M02AA17	PLA2G1B,PTGS2,CLCNKA,PTGS1,PLA2G4A,UGT1A9,SLC16A7,SLC16A1	0	0	0	0	0
DB04557	experimental	small molecule	arachidonic acid		PTGS1,CYP2C9,FABP4,ALB,FABP2,SLCO2A1	0	0	0	0	0
DB04566	experimental	small molecule	inosinic acid		guaB,ADSSL1,hpt,purA,HGPRTase,PYGM,purA,IMPDH2	0	0	0	0	0
DB04574	approved	small molecule	estropipate		ESR1,ESR2,CYP3A4,CYP1A2,CYP2C9,SHBG,ALB,SLC22A1	0	0	0	0	0
DB04630	experimental	small molecule	aldosterone		NR3C2,CYP11B1,CYP11B2,CYP17A1,ABCB1,SLC22A5,SLCO1A2	0	0	0	0	0
DB04714	experimental	small molecule	isopentenyl pyrophosphate		uppS,FDPS,GGPS1,ispF,uppS,ispH	0	0	0	0	0
DB04716	experimental	small molecule	2-(1,1-dimethylethyl)9-fluoro-3,6-dihydro-7h-benz[h]-imidaz[4,5-f]isoquinolin-7-one		JAK2,DAPK3,JAK1,JAK3,TYK2	0	0	0	0	0
DB04725	investigational	small molecule	licofelone		PLA2G2E,PTGS2,ALOX5,CYP2C9,CYP2C8,CYP2J2,CYP2B7,UGT1A3	0	0	0	0	0
DB04786	approved	small molecule	suramin		P2RY2,SIRT5,FSHR,RYR1,F2,PLA2G2A,C3L,ARSA,PLA2G4A	0	0	0	0	0
DB04794	approved	small molecule	bifonazole	D01AC10	ERG11,CYP2B6,CYP19A1,CYP2C19,CYP2E1,CYP3A4	0	0	0	0	0
DB04799	experimental	small molecule	5-n-undecyl-6-hydroxy-4,7-dioxobenzothiazole		CYC1,MT-CYB,UQCRC1,UQCRC2,UQCRH,UQCRQ,UQCRFS1,UQCR11,UQCRB,UQCR10	0	0	0	0	0
DB04821	withdrawn	small molecule	nomifensine		SLC6A2,SLC6A3,MAOB,MAOA,MPO,ORM1	0	0	1	1	0
DB04841	approved	small molecule	flunarizine	N07CA03	CACNA1G,CACNA1H,CACNA1I,HRH1,CALM1,CYP2D6,CYP2B6,CYP2C9,CYP1A1,CYP1A2,CYP2A6	0	0	0	0	0
DB04855	approved	small molecule	dronedarone	C01BD07	ADRA1A,ADRA1B,ADRA1D,ADRA2A,ADRA2B,ADRA2C,ADRB1,KCNH2,CACNA1C,CACNA1D,CACNA1F,CACNA1S,CACNB1,CACNB2,CACNB3,CACNB4,SCN1A,KCNK2,CYP3A4,CYP2D6,ALB,ABCB1	0	1	0	0	1
DB04868	approved, investigational	small molecule	nilotinib	L01XE08	ABL1,KIT,CYP3A4,CYP2C8,CYP2C9,CYP2D6,CYP2B6,ABCB1,ABCG2,UGT1A1	1	0	0	0	1
DB04871	approved	small molecule	lorcaserin	A08AA11	HTR2C,CYP1A2,CYP2A6,CYP2B6,CYP2C19,CYP2D6,CYP3A4,FMO1,CYP1A1	0	0	0	0	1
DB04889	investigational	small molecule	bicifadine		SLC6A2,SLC6A4,DRD2,CYP2D6,MAOB	0	0	0	0	0
DB04896	approved	small molecule	milnacipran	N06AX17	SLC6A4,SLC6A2,GRIN1,GRIN2A,GRIN2B,GRIN2C,GRIN2D,GRIN3A,GRIN3B	0	0	0	0	0
DB04905	investigational	small molecule	tesmilifene		ABCB1,HRH1,CYP3A4,CYP2D6,CYP1A1	0	0	0	0	0
DB04920	approved	small molecule	clevidipine	C08CA16	CACNA1F,CACNA1S,CACNA1D,CACNA1C,CYP2C9,CYP2D6,CYP2E1,CYP2C19,CYP1A2,CYP3A4,BCHE	0	0	0	0	0
DB04938	approved	small molecule	ospemifene	G03XC05	ESR1,CYP3A4,CYP2C9,CYP2C19,CYP2B6	0	0	0	0	0
DB04946	approved	small molecule	iloperidone	N05AX14	HTR2A,DRD2,DRD1,DRD3,DRD4,HTR1A,HTR6,HTR7,ADRA1A,HRH1,ADRA2C,CYP2D6,CYP3A4,CYP3A5,CYP3A7,CYP2E1,CYP1A2	1	1	0	0	1
DB04953	approved	small molecule	ezogabine	N03AX21	KCNQ2,KCNQ3,KCNQ4,KCNQ5,UGT1A1,UGT1A3,UGT1A4,UGT1A9,CYP2A6,NAT2	0	0	0	0	0
DB04957	investigational	small molecule	azimilide		KCNE1,KCNQ1,KCNH2,CYP1A1,CYP3A4,CYP3A5	0	0	0	0	0
DB05014	investigational	small molecule	xl999		FGFR3,FGFR1,KDR,FLT3,PDGFRB,RET	0	0	0	0	0
DB05047	illicit, investigational	small molecule	cx717		GRIA4,BDNF,GRIA1,GRIA2,GRIA3	0	0	0	0	0
DB05066	investigational	small molecule	av411		IL1B,TNF,IL6,IL10,NTF3,GDNF,NTF4	0	0	0	0	0
DB05087	investigational	small molecule	ganaxolone		GABRA1,GABRA2,GABRA3,GABRA4,GABRA5,GABRA6	0	0	0	0	0
DB05109	approved, investigational	small molecule	trabectedin	L01CX01	CYP3A4,CYP2C9,CYP2D6,CYP2E1,CYP2C19,PTGS1	0	0	0	0	0
DB05147	investigational	small molecule	cyt997		TUBA1A,TUBA1B,TUBA1C,TUBA4A,TUBA3C,TUBA3E,TUBA4B,TUBB1,TUBB2A,TUBB2B,TUBB2C,TUBB3,TUBB4,TUBB,TUBB6	0	0	0	0	0
DB05210	investigational	small molecule	sf1126		PIK3R1,PIK3R2,PIK3R3,PRKDC,MTOR	0	0	0	0	0
DB05216	investigational	small molecule	mp470		KIT,MET,RET,PDGFRA,FLT3,RAD51	0	0	0	0	0
DB05241	investigational	small molecule	xl765		PIK3CA,PIK3CG,PIK3CD,PIK3CB,MTOR	0	0	0	0	0
DB05260	approved, investigational	small molecule	gallium nitrate		RRM2,ATP6V1B2,BGLAP,PPI,IL1B,TF,TFR2,TFRC	0	0	0	0	0
DB05266	approved, investigational	small molecule	ibudilast	R03DC04	PDE4A,PDE4B,PDE4C,PDE4D,PDE3A	0	0	0	0	0
DB05271	approved	small molecule	rotigotine	N04BC09	DRD3,DRD4,DRD2,DRD5,DRD1,HTR1A,ADRA2B,CYP3A4,CYP2D6,CYP1A2	0	0	0	0	0
DB05294	approved	small molecule	vandetanib	L01XE12	VEGFA,EGFR,PTK6,TEK,FMO1,FMO3,CYP3A4,ORM1,ALB,ABCC1,ABCG2	0	0	0	0	1
DB05492	investigational	small molecule	epicept np-1		OPRM1,HTR2A,HTR2B,HTR2C,ADRA1A,ADRA1B,ADRA1D,ADRA2A,ADRA2B,ADRA2C,HRH1,OPRL1	0	0	0	0	0
DB05521	approved	small molecule	telaprevir	J05AE11	NS3/4A,CYP3A4,ALB,ORM1,ABCB1	1	0	0	0	0
DB05740	investigational	small molecule	rpi-78m		CHRNA2,CHRNB2,CHRNA7,CHRNA4,CHRNA10,CHRNA9	0	0	0	0	0
DB05752	investigational	small molecule	alks 27		CHRM1,CHRM2,CHRM3,CHRM4,CHRM5	0	0	0	0	0
DB05767	investigational	small molecule	hmpl-004		TNF,IL1B,IL6,NFKB2,NFKB1	0	0	0	0	0
DB05804	investigational	small molecule	dehydroepiandrosterone sulfate		CYP19A1,CYP3A7,PTGS2,SLC22A8,SLCO1A2,SLCO1B1,SLCO1B3,SLCO2B1,SLC10A6	0	0	0	0	0
DB05812	approved	small molecule	abiraterone	L02BX03	CYP17A1,CYP3A4,SULT2A1,CYP2D6,CYP2C8,ALB,ORM1,ABCC1	0	0	0	0	0
DB06042	investigational	small molecule	zen-012		TUBB,TUBB1,TUBB3,TUBB4,TOP2A,TOP2B	0	0	0	0	0
DB06080	investigational	small molecule	abt-869		FLT3,FLT1,KDR,FLT4,KIT,CSF1R	0	0	0	0	0
DB06089	investigational	small molecule	ica-105665		KCNQ1,KCNQ3,KCNQ4,KCNQ5,KCNQ2	0	0	0	0	0
DB06144	approved, withdrawn	small molecule	sertindole	N05AE03	DRD2,HTR2A,HTR2C,HTR6,KCNH2,ADRA1A,ADRA1B,ADRA1D,CYP2D6,CYP3A4	0	0	1	1	0
DB06148	approved	small molecule	mianserin	N06AX03	ADRA2A,HTR2A,HTR2C,HRH1,SLC6A2,SLC6A4,HRH4,HTR1A,ADRA2C,HTR2B,HTR1F,ADRA2B,DRD3,OPRK1,SLC6A3,HTR7,DRD2,HTR6,ADRA1A,ADRA1B,ADRA1D,DRD1,DRD5,CYP2D6,CYP3A4,CYP1A2,CYP2B6	0	0	0	1	0
DB06151	approved	small molecule	acetylcysteine	R05CB01,S01XA08,V03AB23	ACY1,CHUK,IKBKB,GSS,SLC7A11,GRIN2B,GRIN1,GRIN2A,GRIN2D,GRIN3A,SLCO1B1,SLC22A6	0	0	0	0	0
DB06201	approved	small molecule	rufinamide	N03AF03	GRM5,SCN9A,CES1,CYP2E1,CYP3A4,ALB	0	0	0	0	0
DB06204	approved	small molecule	tapentadol	N02AX06	OPRM1,SLC6A2,OPRK1,OPRD1,HTR3A,SLC6A4,UGT1A9,UGT2B7,CYP2D6,CYP2C9,CYP2C19	0	0	0	0	0
DB06207	approved	small molecule	silodosin	G04CA04	ADRA1A,ADRA1B,ADRA1D,CYP3A4,UGT2B7,ABCB1,ABCB4	0	0	0	0	0
DB06209	approved	small molecule	prasugrel	B01AC22	P2RY12,CES2,CYP3A4,CYP2B6,CYP2C9,CYP2C19,ALB	1	0	0	0	0
DB06210	approved	small molecule	eltrombopag	B02BX05	MPL,CYP2C8,CYP1A2,UGT1A1,UGT1A3,SLCO1B1	1	0	0	0	0
DB06216	approved	small molecule	asenapine	N05AH05	DRD2,HTR2A,HTR1A,HTR1B,HTR2B,HTR2C,HTR5A,HTR6,HTR7,ADRA2A,ADRA2B,ADRA2C,ADRA1A,DRD1,DRD3,DRD4,HRH1,HRH2,ADRB1,ADRB2,CYP1A2,CYP2D6,UGT1A4,CYP3A4	0	1	0	0	0
DB06228	approved	small molecule	rivaroxaban	B01AF01	F10,CYP3A4,CYP2J2,CYP3A5,ABCB1	0	0	0	0	0
DB06262	approved, investigational	small molecule	droxidopa		ADRA1A,ADRA1B,ADRA1D,ADRA2A,ADRA2B,ADRA2C,ADRB1,ADRB2,ADRB3,PAH,DDC,SLC6A2,SLC16A10	0	0	0	0	0
DB06268	approved, investigational, withdrawn	small molecule	sitaxentan	C02KX03	EDNRA,EDNRB,CYP2C9,CYP3A4,CYP2C19	0	0	1	0	0
DB06287	approved	small molecule	temsirolimus	L01XE09	MTOR,CYP3A4,CYP3A5,CYP3A7,CYP2D6,ABCB1	0	0	0	0	0
DB06290	approved	small molecule	simeprevir	J05AE14	CYP3A4,CYP1A2,ALB,ABCB1,SLCO1B1	1	0	0	0	0
DB06292	approved	small molecule	dapagliflozin	A10BX09	SLC5A2,CYP1A1,CYP1A2,CYP2A6,CYP2C9,CYP2D6,CYP3A4,UGT1A9,UGT2B4,UGT2B7,ABCB1	0	0	0	0	0
DB06335	approved	small molecule	saxagliptin	A10BH03	DPP4,CYP3A4,CYP3A5,ABCC1,SLCO4C1,SLC22A8	0	0	0	0	0
DB06414	approved	small molecule	etravirine	J05AG04	CYP3A4,CYP2C9,CYP2C19,ABCB1,ABCB4	0	0	0	0	0
DB06589	approved	small molecule	pazopanib	L01XE11	FLT1,KDR,FLT4,PDGFRA,PDGFRB,KIT,FGFR3,ITK,FGF1,SH2B3,CYP3A4,CYP2D6,CYP2C8,CYP1A2,ABCB1,ABCG2,SLCO1B1,UGT1A1	1	0	0	0	1
DB06594	approved, investigational	small molecule	agomelatine	N06AX22	HTR2C,MTNR1A,MTNR1B,CYP1A2,CYP2C9	0	0	0	0	0
DB06605	approved	small molecule	apixaban	B01AF02	F10,CYP3A4,CYP1A2,CYP2C8,CYP2C9,CYP2C19,CYP2J2,CYP3A5,ABCB1,ABCG2	0	0	0	0	0
DB06616	approved	small molecule	bosutinib	L01XE14	BCR,ABL1,LYN,HCK,SRC,CDK2deltaT,MAP2K1,MAP2K2,MAP3K2,CAMK2G,CYP3A4,ABCB1	1	0	0	0	0
DB06626	approved, investigational	small molecule	axitinib	L01XE17	FLT1,KDR,FLT4,CYP3A4,CYP3A5,CYP1A2,CYP2C19,UGT1A1,ABCB1,SLCO1B1	0	0	0	0	0
DB06637	approved	small molecule	dalfampridine	N07XX07	KCNA1,KCNA2,KCNA3,KCNA4,KCNA5,KCNA6,KCNA7,KCNA10,KCNB1,KCNB2,KCNC1,KCNC2,KCNC3,KCND1,KCND2,KCND3,CYP2E1	0	0	0	0	0
DB06684	approved	small molecule	vilazodone	N06AX24	HTR1A,CYP3A4,CYP2C18,CYP2D6,SLC6A4	0	0	0	0	0
DB06694	approved	small molecule	xylometazoline	R01AA07,R01AB06,S01GA03	ADRA1A,ADRA2A,ADRA2B,ADRA1B,ADRA1D,ADRA2C	0	0	0	0	0
DB06695	approved	small molecule	dabigatran etexilate	B01AE07	F2,CES1,CES2,UGT1A9,UGT2B7,UGT2B15,NQO2,ABCB1	0	0	0	0	0
DB06697	approved	small molecule	artemether	P01BE02	CYP3A4,CYP3A5,CYP2B6,CYP2C9,CYP2C19,CYP2D6	0	0	0	0	0
DB06702	approved	small molecule	fesoterodine	G04BD11	CHRM3,CHRM4,CHRM1,CHRM2,CHRM5,CYP3A4,CYP2D6,ABCB1	0	0	0	0	0
DB06710	approved	small molecule	methyltestosterone	G03BA02,G03EK01	AR,CYP19A1,CYP2B6,CYP3A4,ALB,SHBG,SLCO1A2,SLC22A8	0	1	0	0	0
DB06712	approved	small molecule	nilvadipine	C08CA10	CACNA1C,CACNA2D1,CACNB2,CACNA1D,CACNA1S,CACNA2D3,CYP3A4,CYP1A2,CYP2A6,CYP2C19,CYP2C8,CYP2C9,CYP2E1	0	0	0	0	0
DB06729	approved	small molecule	sulfaphenazole	J01ED08	folP,CYP2C9,CYP2A6,CYP2B6,CYP2C8,CYP2D6	0	0	0	0	0
DB06738	approved	small molecule	ketobemidone	N02AB01	OPRM1,OPRK1,OPRD1,GRIN1,GRIN2A,GRIN2B,GRIN2C,GRIN2D,GRIN3A,GRIN3B,PTGS1,CYP2C9,CYP3A4,UGT1A9,CYP2B6,CYP2C19,CYP2C8	0	0	0	0	0
DB06741	investigational	small molecule	gavestinel		GRIN1,GRIN2A,GRIN2B,GRIN2C,GRIN2D,GRIN3A,GRIN3B,CYP2C9,UGT1A1,UGT1A3,UGT1A9,UGT2B4	0	0	0	0	0
DB06770	approved	small molecule	benzyl alcohol		CYP2C8,CYP1A1,ALDH2,CYP2B6,CYP1A2,CYP2E1,CYP2D6,CYP3A4	0	0	0	1	0
DB06772	approved	small molecule	cabazitaxel	L01CD04	TUBA4A,TUBB1,CYP3A4,CYP3A5,CYP2C8,ABCB1,ABCG2,SLCO1B1,SLCO1B3	0	0	0	0	0
DB06779	approved	small molecule	dalteparin	B01AB04	SERPINC1,VEGFA,TFPI,SELP,HPSE	0	0	0	0	0
DB07080	experimental	small molecule	n-(2,2,2-trifluoroethyl)-n-{4-[2,2,2-trifluoro-1-hydroxy-1-(trifluoromethyl)ethyl]phenyl}benzenesulfonamide		NR1H2,NCOA2,RXRB,NR1H3,NCOA1,NR1I2	0	0	0	0	0
DB07374	experimental	small molecule	anisomycin		RPL10L,RPL13A,RPL23,RPL15,RPL19,RPL23A,RSL24D1,RPL26L1,RPL8,RPL37,RPL3,RPL11,NHP2L1	0	0	0	0	0
DB07401	experimental	small molecule	methyl (2z)-2-(2-{[6-(2-cyanophenoxy)pyrimidin-4-yl]oxy}phenyl)-3-methoxyacrylate		CYC1,MT-CYB,UQCRC1,UQCRC2,UQCRH,UQCRQ,UQCRFS1,UQCR11,UQCRB,UQCR10	0	0	0	0	0
DB07475	experimental	small molecule	n-[(1r)-1-(dihydroxyboryl)-3-methylbutyl]-n-(pyrazin-2-ylcarbonyl)-l-phenylalaninamide		PSMA1,PSMA2,PSMA3,PSMA4,PSMA5,PSMA6,PSMA7,PSMB1,PSMB2,PSMB3,PSMB4,PSMB5,PSMB6,PSMB7	0	0	0	0	0
DB07574	experimental	small molecule	2-mercapto-n-[1,2,3,10-tetramethoxy-9-oxo-5,6,7,9-tetrahydro-benzo[a]heptalen-7-yl]acetamide		STMN4,TUBB2B,TUBA1A,TUBA1C,TUBA1B	0	0	0	0	0
DB07636	experimental	small molecule	5-heptyl-6-hydroxy-1,3-benzothiazole-4,7-dione		MT-CYB,UQCRFS1,CYC1,UQCRB,UQCR10	0	0	0	0	0
DB07664	experimental	small molecule	5-amino-3-{[4-(aminosulfonyl)phenyl]amino}-n-(2,6-difluorophenyl)-1h-1,2,4-triazole-1-carbothioamide		CSNK1G3,SLK,CAMK4,CLK3,ABL2	0	0	0	0	0
DB07690	experimental	small molecule	(3alpha,5beta,12alpha)-3,12-dihydroxycholan-24-oic acid		ksi,ppcA,EFTUD1,cbh,aldA,acrB,ctaD,ctaC	0	0	0	0	0
DB07752	experimental	small molecule	farnesyl		GNGT1,GNB1,PDC,KRAS,FNTA,FNTB,RABGGTA,RABGGTB,CHM	0	0	0	0	0
DB07763	experimental	small molecule	(5s)-3-anilino-5-(2,4-difluorophenyl)-5-methyl-1,3-oxazolidine-2,4-dione		CYC1,MT-CYB,UQCRC1,UQCRC2,UQCRH,UQCRQ,UQCRFS1,UQCR11,UQCRB,UQCR10	0	0	0	0	0
DB07778	experimental	small molecule	famoxadone		CYC1,MT-CYB,UQCRC1,UQCRC2,UQCRH,UQCRQ,UQCRFS1,UQCR11,UQCRB,UQCR10	0	0	0	0	0
DB07780	experimental	small molecule	farnesyl diphosphate		FNTA,FNTB,KRAS,ispF,FDPS,uppS,nisZ,GGPS1,Rv1086,RABGGTA,RABGGTB	0	0	0	0	0
DB07841	experimental	small molecule	geranylgeranyl diphosphate		FNTA,PGGT1B,FNTB,GGPS1,FDPS,RABGGTA,RABGGTB	0	0	0	0	0
DB07954	experimental	small molecule	3-isobutyl-1-methylxanthine		PDE5A,PDE3B,PDE7A,PDE4D,PDE9A,PDE8A,PDE2A,PDE6G	0	0	0	0	0
DB08231	experimental	small molecule	myristic acid		PKIA,PRKACA,fadR,PECI,RCVRN,CALM1,luxF,ABL1,lpxC,HNF4A,NCOA1,nef,fhuA,FKBP1A,PPP3R1,PPP3CA,MT1417,gag-pol,TRAPPC3,INS,GM2A,ARF6,LY96,tonB,gag,gag-pol,ARF1,GUCA1A,Rv0233,PVR,TLR4,ALB,FABP2,APOM	0	0	0	0	0
DB08235	experimental	small molecule	n-[2-(2-methyl-1h-indol-3-yl)ethyl]thiophene-2-carboxamide		ARPC1B,ACTR2,ACTR3,ARPC2,ARPC3,ARPC4,ARPC5	0	0	0	0	0
DB08236	experimental	small molecule	(2s)-2-(3-bromophenyl)-3-(5-chloro-2-hydroxyphenyl)-1,3-thiazolidin-4-one		ARPC1B,ACTR2,ACTR3,ARPC2,ARPC3,ARPC4,ARPC5	0	0	0	0	0
DB08330	experimental	small molecule	methyl (2z)-3-methoxy-2-{2-[(e)-2-phenylvinyl]phenyl}acrylate		CYC1,MT-CYB,UQCRC1,UQCRC2,UQCRH,UQCRQ,UQCRFS1,UQCR11,UQCRB,UQCR10	0	0	0	0	0
DB08342	experimental	small molecule	s-palmitoyl-l-cysteine		TRAPPC6A,TRAPPC3,TRAPPC6B,TRAPPC5,TRAPPC4,TRAPPC1	0	0	0	0	0
DB08348	experimental	small molecule	n~2~,n~2~-dimethyl-n~1~-(6-oxo-5,6-dihydrophenanthridin-2-yl)glycinamide		eta,EEF2,toxA,PARP3,PARP15	0	0	0	0	0
DB08437	experimental	small molecule	puromycin		RPL10L,RPL13A,RPL23,RPL15,RPL19,RPL23A,RSL24D1,RPL26L1,RPL8,RPL37,RPL3,RPL11,aat	0	0	0	0	0
DB08453	experimental	small molecule	2-nonyl-4-hydroxyquinoline n-oxide		CYC1,MT-CYB,UQCRC1,UQCRC2,UQCRH,UQCRQ,UQCRFS1,UQCR11,UQCRB,UQCR10,petB,petA,petC,petD,petG,petL,petM,petN	0	0	0	0	0
DB08515	experimental	small molecule	(3ar,6r,6as)-6-((s)-((s)-cyclohex-2-enyl)(hydroxy)methyl)-6a-methyl-4-oxo-hexahydro-2h-furo[3,2-c]pyrrole-6-carbaldehyde		PSMA1,PSMA2,PSMA3,PSMA4,PSMA5,PSMA6,PSMA7,PSMB1,PSMB2,PSMB3,PSMB4,PSMB5,PSMB6,PSMB7	0	0	0	0	0
DB08689	experimental	small molecule	ubiquinone-1		pufC,puhA,pufL,pufM,SDHA,SDHB,SDHD,SDHC,dsbA,dsbB,nrfC,TT_C0155,TT_C0153	0	0	0	0	0
DB08690	experimental	small molecule	ubiquinone-2		sdhA,sdhB,sdhC,sdhD,CYC1,MT-CYB,UQCRC1,UQCRC2,UQCRH,UQCRQ,UQCRFS1,UQCR11,UQCRB,UQCR10,pufC,puhA,pufL,pufM,dsbB,petB,petA,petC,pufL,pufM,puhA	0	0	0	0	0
DB08795	approved	small molecule	azidocillin	J01CE04	pbp2a,pbp1b,pbp3,pbpA,penA,SLC22A5,SLC15A1,SLC15A2	0	0	0	0	0
DB08807	approved	small molecule	bopindolol	C07AA17	ADRB1,ADRB2,HTR1A,HTR1B,ADRB3	0	0	0	0	0
DB08811	approved	small molecule	tofisopam	N05BA23	PDE4A,PDE10A,PDE3A,PDE2A,CYP3A4	0	0	0	0	0
DB08815	approved	small molecule	lurasidone	N05AE05	DRD2,HTR2A,HTR7,HTR1A,ADRA2C,ADRA2A,CYP3A4	0	0	0	0	0
DB08818	approved	small molecule	hyaluronan	D03AX05,M09AX01,R01AX09,S01KA01	CD44,ICAM1,HMMR,NCAN,VCAN,C1QBP,HAPLN1,HAPLN3,HAPLN4,HABP2,LAYN,STAB2,TNFAIP6,IMPG2,HABP4	0	0	0	0	0
DB08820	approved	small molecule	ivacaftor	R07AX02	CFTR,CYP3A4,ALB,ORM1,ABCB1	1	0	0	0	0
DB08828	approved	small molecule	vismodegib	L01XX43	SMO,CYP2C9,CYP3A4,CYP2C8,CYP2C19,ALB,ORM1,ABCB1,ABCG2	0	0	0	0	0
DB08834	approved, investigational	small molecule	tauroursodeoxycholic acid		Cyp3a1,Cyp3a2,Cyp2a1,Cyp2a2,Cyp2b1,Cyp2b2,Cyp2b9,SLCO1A2,SLC7A11	0	0	0	0	0
DB08837	experimental	small molecule	tetraethylammonium		kcsA,CHRNA9,Kcnma1,SLC22A1,SLC22A2,SLC22A3,SLC22A4,SLC22A5,SLC22A8	0	0	0	0	0
DB08838	experimental, investigational	small molecule	agmatine		ADRA2C,NISCH,CHRNA1,GRIN1,KCNJ1,CACNA1B,ASIC3,SLC22A1,SLC22A2,SLC22A3,SLC7A7	0	0	0	0	0
DB08846	investigational	small molecule	ellagic acid		CA1,CA2,CA3,CA4,CA5A,CA5B,CA6,CA7,CA9,CA12,CA14,CSNK2A1,PRKACA,PRKCA,PRKCB,SYK,SQLE,CYP1A1,CYP2E1,SLC22A6,SLC22A11	0	0	0	0	0
DB08860	approved	small molecule	pitavastatin	C10AA08	HMGCR,UGT2B7,UGT1A3,CYP2C9,CYP2C8,ALB,ORM1,SLCO1B1,SLCO1B3,SLCO2B1,SLC10A1,ABCG2,ABCB1,ABCC2	0	0	0	0	0
DB08864	approved	small molecule	rilpivirine	J05AG05	pol,NR1I2,CYP3A4,CYP2C19,CYP2B6,CYP1A2,ABCB1,ABCG2,SLCO1B1,SLCO1B3	0	0	0	0	0
DB08868	approved, investigational	small molecule	fingolimod	L04AA27	S1PR5,CYP4F2,SPHK1,CYP2D6,CYP2E1,CYP3A4,CYP4F12	0	0	0	0	0
DB08875	approved	small molecule	cabozantinib	L01XE26	MET,KDR,RET,CYP3A4,CYP2C9	0	0	0	0	0
DB08881	approved	small molecule	vemurafenib	L01XE15	BRAF,CYP1A2,CYP2D6,CYP3A4,ALB,ORM1,ABCC1,ABCG2	1	0	0	0	0
DB08884	approved	small molecule	gadoxetate		SLCO1B1,SLCO1B3,ABCC3,ABCC2,ABCC4	0	0	0	0	0
DB08889	approved	small molecule	carfilzomib	L01XX45	PSMB5,PSMB8,PSMB1,PSMB9,PSMB2,PSMB10,ABCB1	0	0	0	0	0
DB08893	approved	small molecule	mirabegron	G04BD12	ADRB3,CYP3A4,CYP2D6,BCHE,ALB,ORM1,ABCB1,SLCO1A2	0	0	0	0	0
DB08895	approved	small molecule	tofacitinib	L04AA29	JAK2,JAK1,JAK3,CYP3A4,CYP2C19,ALB	0	0	0	0	0
DB08896	approved	small molecule	regorafenib	L01XE21	RET,FLT1,KDR,FLT4,KIT,PDGFRA,PDGFRB,FGFR1,FGFR2,TEK,DDR2,NTRK1,EPHA2,RAF1,BRAF,MAPK11,FRK,ABL1,CYP3A4,UGT1A9,CYP2C8,CYP2C9,CYP2B6,CYP2C19,UGT1A1,ABCB1,ABCG2	0	0	0	0	0
DB08897	approved	small molecule	aclidinium		CHRM1,CHRM2,CHRM3,CHRM4,CHRM5,BCHE	0	0	0	0	0
DB08899	approved	small molecule	enzalutamide	L02BB04	AR,CYP2C8,CYP3A4,CYP2C9,CYP2C19,CYP2B6,CYP2D6,CYP3A5,ALB,ABCB1	0	0	0	0	0
DB08901	approved	small molecule	ponatinib	L01XE24	ABL1,BCR,KIT,RET,TEK,FLT3,FGFR1,FGFR2,FGFR3,FGFR4,LCK,SRC,LYN,KDR,PDGFRA,CYP3A4,CYP2C8,CYP2D6,CYP3A5,ABCB1,ABCG2,ABCB11	1	0	0	0	0
DB08907	approved	small molecule	canagliflozin	A10BX11	SLC5A2,SLC5A1,UGT1A9,UGT2B4,CYP3A4,ALB,ORM1,ABCB1,ABCC2	0	0	0	0	0
DB08910	approved	small molecule	pomalidomide	L04AX06	CRBN,TNF,PTGS2,CYP1A2,CYP3A4,ABCB1	0	0	0	0	0
DB08912	approved	small molecule	dabrafenib	L01XE23	BRAF,RAF1,SIK1,NEK11,LIMK1,CYP3A4,CYP2C8,ABCB1,ABCG2,SLCO1B1,SLCO1B3,SLC22A6,SLC22A8	1	0	0	0	0
DB08916	approved	small molecule	afatinib	L01XE13	EGFR,ERBB2,ERBB4,ABCB1,ABCG2	1	0	0	0	0
DB08918	approved	small molecule	levomilnacipran		SLC6A4,SLC6A2,CYP3A4,CYP2C8,CYP2C19,CYP2D6,CYP2J2,ABCB1	0	0	0	0	0
DB08930	approved	small molecule	dolutegravir	J05AX12	pol,UGT1A1,POU2F2,CYP3A4,CYP3A43,CYP3A5,CYP3A7	0	0	0	0	0
DB08932	approved	small molecule	macitentan	C02KX04	EDNRA,EDNRB,CYP3A4,CYP2C19,ALB	0	0	0	0	0
DB09054	approved	small molecule	idelalisib		AOX1,CYP2C8,CYP2C19,CYP2B6,CYP3A4,ABCG2,ABCB1,SLCO1B1,SLCO1B3	0	0	0	0	0
DB09074	approved	small molecule	olaparib		PARP1,PARP2,PARP3,CYP3A4,CYP2B6	0	0	0	0	0
DB09076	approved	small molecule	umeclidinium		CHRM1,CHRM2,CHRM3,CHRM4,CHRM5,CYP2D6,ABCB1	0	0	0	0	0
DB09078	approved	small molecule	lenvatinib		FLT1,KDR,FLT4,FGFR1,FGFR2,FGFR3,FGFR4,KIT,CYP3A4,AOX1,ABCB1,ABCG2	0	0	0	0	0
DB09079	approved	small molecule	nintedanib		FLT1,KDR,FLT4,FGFR1,FGFR2,FGFR3,FLT3,LCK,LYN,SRC,ABCB1	0	0	0	0	0
